# Supplementary material for: Efficient access to 1,3,4-trisubstituted pyrroles via gold-catalysed cycloisomerization of 1,5-diynes
Source: Royal Society of Chemistry journal article supplement (doi:10.1039/d1ob02393d), 2022-01-01
Supplement: d1ob02393d1.pdf [file d1ob02393d1.pdf]

## Supplementary Information

### Efficient Access to 1,3,4-Trisubstituted Pyrroles via Gold-Catalysed Cycloisomerization of 1,5-Diynes

Qiuling Wan<sup>a</sup>, Luoting Xin<sup>b</sup>, Jian Zhang<sup>b\*</sup> and Xueliang Huang<sup>c\*</sup>

<sup>a</sup>*College of Chemistry and Materials Science, Fujian Normal University, Fuzhou, Fujian 350007, P. R. China.*

<sup>b</sup>*State Key Laboratory of Structural Chemistry, Fujian Institute of Research on the Structure of Matter, Chinese Academy of Sciences, Fuzhou, Fujian 350002, P. R. China.  
zhj@fjirsm.ac.cn.*

<sup>c</sup>*Key Laboratory of Chemical Biology and Traditional Chinese Medicine Research, Ministry of Education of China, Key Laboratory of the Assembly and Application of Organic Functional Molecules of Hunan Province, College of Chemistry and Chemical Engineering, Hunan Normal University, Changsha, Hunan 410081, China.  
huangxl@hunnu.edu.cn*

#### Table of Content

|                                                           |            |
|-----------------------------------------------------------|------------|
| <b>General information .....</b>                          | <b>S2</b>  |
| <b>General Procedure for the Synthesis of diynes.....</b> | <b>S2</b>  |
| <b>General procedure for the synthesis of pyrrol.....</b> | <b>S10</b> |
| <b>Crystal structure .....</b>                            | <b>S20</b> |
| <b>References .....</b>                                   | <b>S21</b> |
| <b>NMR Spectra.....</b>                                   | <b>S22</b> |

## General information

Unless otherwise indicated, all reagents were used as received from commercial suppliers without further purification. Reaction progress was monitored by thin layer chromatography (TLC). Visualization was achieved by ultraviolet light (254 nm). Flash column chromatography was performed using silica gel 60 (200-300 mesh, Merck and co.). All  $^1\text{H}$  NMR,  $^{13}\text{C}$  NMR spectra were recorded on Bruker AV-III 400 in  $\text{CDCl}_3$ . Chemical shifts were given in parts per million (ppm,  $\delta$ ), referenced to the peak of tetramethylsilane, defined at  $\delta = 0.00$  ( $^1\text{H}$  NMR), or the solvent peak of  $\text{CDCl}_3$ , defined at  $\delta = 77.16$  ( $^{13}\text{C}$  NMR). Coupling constants were quoted in Hz ( $J$ ).  $^1\text{H}$  NMR Spectroscopy splitting patterns were designated as singlet (s), doublet (d), triplet (t), quartet (q), pentet (p), septet (se), octet (o). Splitting patterns that could not be interpreted or easily visualized were designated as multiplet (m). Mass spectra were recorded on a high resolution mass spectrometer ESI-QTOF.

## General Procedure for the Synthesis of diynes

Compounds diynes (**1a**, **1c**, **1d**, **1e**, **1f**, **1n**) were prepared according to the known procedure. The data of new compounds are described below.<sup>1-9</sup>

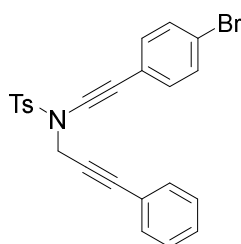

### N-((4-bromophenyl)ethynyl)-4-methyl-N-(3-phenylprop-2-yn-1-yl)benzenesulfonamide (**1b**)

Compound **1b** was obtained as white solid;  $R_f = 0.6$  (petroleum ether : ethyl acetate = 5 : 1);  $^1\text{H}$  NMR (400 MHz,  $\text{CDCl}_3$ , TMS)  $\delta$  7.90 (d,  $J = 8.4$  Hz, 2H), 7.43-7.40 (m, 2H), 7.32-7.23 (m, 7H), 7.17-7.15 (m, 2H), 4.56 (s, 2H), 2.36 (s, 3H);  $^{13}\text{C}$  NMR (101 MHz,  $\text{CDCl}_3$ )  $\delta$  145.2, 134.4, 133.1, 131.8, 131.7, 129.8, 128.8, 128.4, 128.3, 122.2, 122.1, 121.8, 86.7, 83.2, 81.1, 70.5, 43.0, 21.7; HRMS (ESI)  $m/z$  calcd for  $\text{C}_{24}\text{H}_{18}\text{BrNO}_2\text{SNa}^+$  ( $\text{M}+\text{Na}$ ) $^+$  486.0134, found 486.0139.

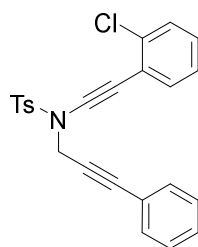

### N-((2-chlorophenyl)ethynyl)-4-methyl-N-(3-phenylprop-2-yn-1-yl)benzenesulfonamide (**1g**)

Compound **1g** was obtained as white solid;  $R_f = 0.55$  (petroleum ether : ethyl acetate = 5 : 1);  $^1\text{H}$  NMR (400 MHz,  $\text{CDCl}_3$ , TMS)  $\delta$  7.96 (d,  $J = 8.4$  Hz, 2H), 7.43-7.41 (m, 1H), 7.37-7.34 (m, 1H), 7.28-7.22 (m, 5H), 7.20 -7.15 (m, 4H), 4.59 (s, 2H), 2.33 (s, 3H);  $^{13}\text{C}$  NMR (101 MHz,  $\text{CDCl}_3$ )  $\delta$  145.1, 135.7, 134.4, 133.0, 131.8, 129.8, 129.3, 128.9, 128.7, 128.4, 128.2, 126.5, 122.8, 122.1, 87.1, 86.7, 81.1, 68.6, 43.1, 21.7; HRMS (ESI)  $m/z$  calcd for  $\text{C}_{24}\text{H}_{18}\text{ClNO}_2\text{SNa}^+$  ( $\text{M}+\text{Na}$ ) $^+$  442.0639, found 442.0639.

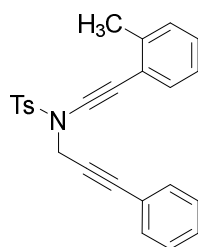

#### 4-methyl-N-(3-phenylprop-2-yn-1-yl)-N-(o-tolyethynyl)benzenesulfonamide (**1h**)

Compound **1h** was obtained as white solid;  $R_f = 0.57$  (petroleum ether : ethyl acetate = 5 : 1);  $^1\text{H}$  NMR (400 MHz,  $\text{CDCl}_3$ , TMS)  $\delta$  7.91 (d,  $J = 8.0$  Hz, 2H), 7.37 (d,  $J = 7.6$  Hz, 1H), 7.27-7.22 (m, 5H), 7.18-7.10 (m, 5H), 4.57 (s, 2H), 2.35 (s, 3H), 2.33 (s, 3H);  $^{13}\text{C}$  NMR (101 MHz,  $\text{CDCl}_3$ )  $\delta$  145.0, 140.2, 134.4, 131.8, 131.7, 129.7, 129.4, 128.7, 128.4, 128.2, 128.1, 125.6, 122.5, 122.1, 86.5, 85.8, 81.3, 70.1, 43.1, 21.7, 20.8; HRMS (ESI)  $m/z$  calcd for  $\text{C}_{25}\text{H}_{21}\text{NO}_2\text{SNa}^+$  ( $\text{M}+\text{Na}$ ) $^+$  422.1185, found 422.1187.

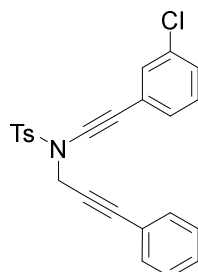

#### N-((3-chlorophenyl)ethynyl)-4-methyl-N-(3-phenylprop-2-yn-1-yl)benzenesulfonamide (**1i**)

Compound **1i** was obtained as white solid;  $R_f = 0.6$  (petroleum ether : ethyl acetate = 5 : 1);  $^1\text{H}$  NMR (400 MHz,  $\text{CDCl}_3$ , TMS)  $\delta$  7.90 (d,  $J = 8.0$  Hz, 2H), 7.357-7.353 (m, 1H), 7.31-7.21 (m, 8H), 7.19-7.16 (m, 2H), 4.56 (s, 2H), 2.37 (s, 3H).;  $^{13}\text{C}$  NMR (101 MHz,  $\text{CDCl}_3$ )  $\delta$  145.2, 134.4, 134.2, 131.8, 131.3, 129.8, 129.64, 129.62, 128.8, 128.4, 128.33, 128.26, 124.6, 122.1, 86.8, 83.4, 81.1, 70.3, 43.0, 21.7. HRMS (ESI)  $m/z$  calcd for  $\text{C}_{24}\text{H}_{18}\text{ClNO}_2\text{SNa}^+$  ( $\text{M}+\text{Na}$ ) $^+$  442.0639, found 442.0641.

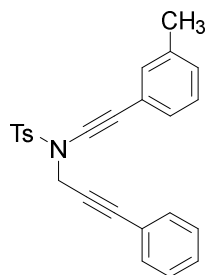

**4-methyl-N-(3-phenylprop-2-yn-1-yl)-N-(m-tolylethynyl)benzenesulfonamide (1j)**

Compound **1j** was obtained as white solid;  $R_f = 0.6$  (petroleum ether : ethyl acetate = 5 : 1);  $^1\text{H NMR}$  (400 MHz,  $\text{CDCl}_3$ , TMS)  $\delta$  7.91 (d,  $J = 8.0$  Hz, 2H), 7.29-7.21 (m, 6H), 7.19-7.16 (m, 4H), 7.10-7.08 (m, 1H), 4.55 (s, 2H), 2.34 (s, 3H), 2.30 (s, 3H);  $^{13}\text{C NMR}$  (101 MHz,  $\text{CDCl}_3$ )  $\delta$  145.0, 138.1, 134.4, 132.3, 131.8, 129.7, 129.0, 128.73, 128.72, 128.4, 128.29, 128.27, 122.6, 122.2, 86.6, 81.8, 81.3, 71.4, 43.1, 21.7, 21.3; HRMS (ESI)  $m/z$  calcd for  $\text{C}_{25}\text{H}_{21}\text{NO}_2\text{SNa}^+$  ( $\text{M}+\text{Na}$ ) $^+$  422.1185, found 422.1187.

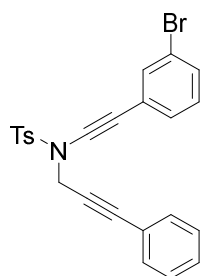

**N-((3-bromophenyl)ethynyl)-4-methyl-N-(3-phenylprop-2-yn-1-yl)benzenesulfonamide (1k)**

Compound **1k** was obtained as pale yellow solid;  $R_f = 0.6$  (petroleum ether : ethyl acetate = 5 : 1);  $^1\text{H NMR}$  (400 MHz,  $\text{CDCl}_3$ , TMS)  $\delta$  7.90 (d,  $J = 8.0$  Hz, 2H), 7.52-7.51 (m, 1H), 7.42-7.39 (m, 1H), 7.31-7.24 (m, 6H), 7.19-7.13 (m, 3H), 4.56 (s, 2H), 2.36 (s, 3H);  $^{13}\text{C NMR}$  (101 MHz,  $\text{CDCl}_3$ )  $\delta$  145.2, 134.3, 134.2, 131.8, 131.1, 130.0, 129.8, 128.8, 128.33, 128.32, 124.8, 122.2, 122.0, 86.8, 83.5, 81.1, 70.1, 43.0, 21.7; HRMS (ESI)  $m/z$  calcd for  $\text{C}_{24}\text{H}_{18}\text{BrNO}_2\text{SNa}^+$  ( $\text{M}+\text{Na}$ ) $^+$  486.0134, found 486.0139.

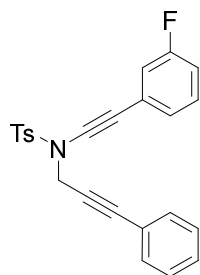

**N-((3-fluorophenyl)ethynyl)-4-methyl-N-(3-phenylprop-2-yn-1-yl)benzenesulfonamide (1l)**

Compound **1l** was obtained as white solid;  $R_f = 0.6$  (petroleum ether : ethyl acetate = 5 : 1);  $^1\text{H NMR}$  (400 MHz,  $\text{CDCl}_3$ , TMS)  $\delta$  7.90 (d,  $J = 7.6$  Hz, 2H), 7.30-7.22 (m, 6H), 7.17-7.16 (m, 3H), 7.07 (d,  $J = 9.2$  Hz, 1H), 6.98 (t,  $J = 8.0$  Hz, 1H), 4.56 (s, 2H), 2.35 (s, 3H);  $^{13}\text{C NMR}$  (101 MHz,  $\text{CDCl}_3$ )  $\delta$  162.4 (d,  $J = 247.2$  Hz), 145.2, 134.3, 131.7, 130.0 (d,  $J = 8.8$  Hz), 129.8, 128.8, 128.32, 128.29, 127.4 (d,  $J = 2.9$  Hz), 124.6 (d,  $J = 9.8$  Hz), 122.0, 118.2 (d,  $J = 22.8$  Hz), 115.3 (d,  $J = 21.2$  Hz), 86.7, 83.1, 81.1, 70.4, 42.9, 21.7;  $^{19}\text{F NMR}$  (376 MHz,  $\text{CDCl}_3$ )  $\delta$  -113.09; HRMS (ESI)  $m/z$  calcd for  $\text{C}_{24}\text{H}_{18}\text{FNO}_2\text{SNa}^+$  ( $\text{M}+\text{Na}$ ) $^+$  426.0935, found 426.0935.

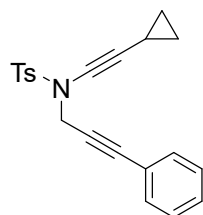

**N-(cyclopropylethynyl)-4-methyl-N-(3-phenylprop-2-yn-1-yl)benzenesulfonamide (1m)**

Compound **1m** was obtained as yellow solid;  $R_f = 0.6$  (petroleum ether : ethyl acetate = 5 : 1);  $^1\text{H NMR}$  (400 MHz,  $\text{CDCl}_3$ , TMS)  $\delta$  7.85 (d,  $J = 8.0$  Hz, 2H), 7.31-7.23 (m, 5H), 7.15-7.13 (m, 2H), 4.41 (s, 2H), 2.35 (s, 3H), 1.35-1.29 (m, 1H), 0.81-0.76 (m, 2H), 0.67-0.63 (m, 2H);  $^{13}\text{C NMR}$  (100 MHz,  $\text{CDCl}_3$ )  $\delta$  144.7, 134.3, 131.7, 129.5, 128.6, 128.3, 128.2, 122.2, 86.2, 81.5, 75.5, 68.4, 42.9, 21.7, 9.0, -0.6; HRMS (ESI)  $m/z$  calcd for  $\text{C}_{21}\text{H}_{19}\text{NO}_2\text{SNa}^+$  ( $\text{M}+\text{Na}$ ) $^+$  372.1029, found 372.1029.

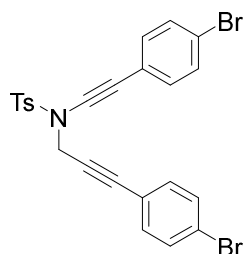

**N-((4-bromophenyl)ethynyl)-N-(3-(4-bromophenyl)prop-2-yn-1-yl)-4-methylbenzenesulfonamide (1o)**

Compound **1o** was obtained as pale yellow solid;  $R_f = 0.6$  (petroleum ether : ethyl acetate = 5 : 1);  $^1\text{H NMR}$  (400 MHz,  $\text{CDCl}_3$ , TMS)  $\delta$  7.89 (d,  $J = 8.0$  Hz, 2H), 7.42 (d,  $J = 8.8$  Hz, 2H), 7.39 (d,  $J = 8.8$  Hz, 2H), 7.30 (d,  $J = 8.0$  Hz, 2H), 7.23 (d,  $J = 8.8$  Hz, 2H), 7.02 (d,  $J = 8.8$  Hz, 2H), 4.53 (s, 2H), 2.38 (s, 3H);  $^{13}\text{C NMR}$  (101 MHz,  $\text{CDCl}_3$ )  $\delta$  145.2, 134.3, 133.2, 133.0, 131.7, 131.6, 129.8,

128.4, 123.2, 122.3, 121.7, 121.0, 85.6, 83.1, 82.4, 70.5, 42.9, 21.8; HRMS (ESI)  $m/z$  calcd for  $C_{24}H_{17}Br_2NO_2SNa^+$  ( $M+Na$ ) $^+$  565.9219, found 565.9222.

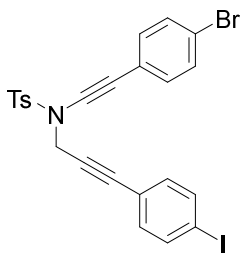

**N-((4-bromophenyl)ethynyl)-N-(3-(4-iodophenyl)prop-2-yn-1-yl)-4-methylbenzenesulfonamide (1p)**

Compound **1p** was obtained as white solid;  $R_f = 0.57$  (petroleum ether : ethyl acetate = 5 : 1);  $^1H$  NMR (400 MHz,  $CDCl_3$ , TMS)  $\delta$  7.88 (d,  $J = 8.0$  Hz, 2H), 7.59 (d,  $J = 8.0$  Hz, 2H), 7.42 (d,  $J = 8.0$  Hz, 2H), 7.30-7.22 (m, 4H), 6.88 (d,  $J = 8.0$  Hz, 2H), 4.53 (s, 2H), 2.38 (s, 3H);  $^{13}C$  NMR (101 MHz,  $CDCl_3$ )  $\delta$  145.2, 137.5, 134.3, 133.2, 133.0, 131.7, 129.8, 128.3, 122.3, 121.6, 121.5, 94.9, 85.8, 83.1, 82.7, 70.5, 42.9, 21.8; HRMS (ESI)  $m/z$  calcd for  $C_{24}H_{17}BrINO_2SNa^+$  ( $M+Na$ ) $^+$  611.9100, found 611.9101.

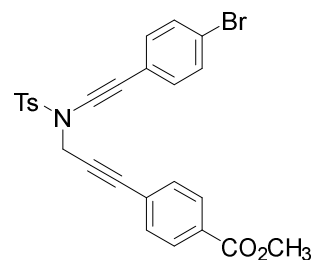

**methyl 4-(3-((N-((4-bromophenyl)ethynyl)-4-methylphenyl)sulfonamido)prop-1-yn-1-yl)benzoate (1q)**

Compound **1q** was obtained as pale yellow solid;  $R_f = 0.55$  (petroleum ether : ethyl acetate = 5 : 1);  $^1H$  NMR (400 MHz,  $CDCl_3$ , TMS)  $\delta$  7.94-7.89 (m, 4H), 7.42 (d,  $J = 8.0$  Hz, 2H), 7.30 (d,  $J = 8.0$  Hz, 2H), 7.26-7.20 (m, 4H), 4.57 (s, 2H), 3.91 (s, 3H), 2.36 (s, 3H);  $^{13}C$  NMR (101 MHz,  $CDCl_3$ )  $\delta$  166.4, 145.3, 134.2, 133.0, 131.7, 131.6, 130.1, 129.8, 129.4, 128.3, 126.6, 122.3, 121.6, 85.8, 84.2, 83.1, 70.5, 52.4, 42.8, 21.7; HRMS (ESI)  $m/z$  calcd for  $C_{26}H_{20}BrNO_4SNa^+$  ( $M+Na$ ) $^+$  544.0189, found 544.0190.

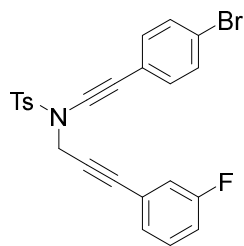

**N-((4-bromophenyl)ethynyl)-N-(3-(3-fluorophenyl)prop-2-yn-1-yl)-4-methylbenzenesulfonamide (1r)**

Compound **1r** was obtained as yellow solid;  $R_f = 0.6$  (petroleum ether : ethyl acetate = 5 : 1);  $^1\text{H}$  NMR (400 MHz,  $\text{CDCl}_3$ , TMS)  $\delta$  7.90 (d,  $J = 8.4$  Hz, 2H), 7.42 (d,  $J = 8.4$  Hz, 2H), 7.31 (d,  $J = 8.0$  Hz, 2H), 7.25-7.19 (m, 3H), 7.00 (td,  $J_1 = 8.4$ ,  $J_2 = 2.4$  Hz, 1H), 6.95 (d,  $J = 8.0$  Hz, 1H), 6.78 (d,  $J = 8.8$  Hz, 1H), 4.55 (s, 2H), 2.38 (s, 3H);  $^{13}\text{C}$  NMR (101 MHz,  $\text{CDCl}_3$ )  $\delta$  162.2 (d,  $J = 247.7$  Hz), 145.3, 134.3, 133.0, 131.6, 129.9 (d,  $J = 8.6$  Hz), 129.8, 128.3, 127.6 (d,  $J = 3.1$  Hz), 123.8 (d,  $J = 9.5$  Hz), 122.3, 121.6, 118.6 (d,  $J = 23.1$  Hz), 116.2 (d,  $J = 21.2$  Hz), 85.4 (d,  $J = 3.4$  Hz), 83.1, 82.1, 70.4, 42.8, 21.6;  $^{19}\text{F}$  NMR (376 MHz,  $\text{CDCl}_3$ )  $\delta$  -112.70; HRMS (ESI)  $m/z$  calcd for  $\text{C}_{24}\text{H}_{17}\text{BrFNO}_2\text{SNa}^+$  ( $\text{M}+\text{Na}$ ) $^+$  504.00340, found 504.0045.

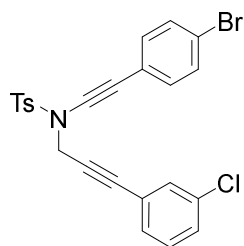

**N-((4-bromophenyl)ethynyl)-N-(3-(2-chlorophenyl)prop-2-yn-1-yl)-4-methylbenzenesulfonamide (1s)**

Compound **1s** was obtained as yellow solid;  $R_f = 0.6$  (petroleum ether : ethyl acetate = 5 : 1);  $^1\text{H}$  NMR (400 MHz,  $\text{CDCl}_3$ , TMS)  $\delta$  7.90 (d,  $J = 7.6$  Hz, 2H), 7.38 (d,  $J = 8.0$  Hz, 2H), 7.29 (d,  $J = 7.6$  Hz, 2H), 7.24-7.22 (m, 3H), 7.16 (t,  $J = 7.6$  Hz, 1H), 7.05-7.02 (m, 2H), 4.55 (s, 2H), 2.36 (s, 3H);  $^{13}\text{C}$  NMR (101 MHz,  $\text{CDCl}_3$ )  $\delta$  145.2, 134.1, 133.8, 132.9, 131.5, 131.4, 129.68, 129.65, 129.5, 128.9, 128.1, 123.5, 122.1, 121.4, 85.0, 83.1, 82.4, 70.3, 42.6, 21.6. HRMS (ESI)  $m/z$  calcd for  $\text{C}_{24}\text{H}_{17}\text{BrClNO}_2\text{SNa}^+$  ( $\text{M}+\text{Na}$ ) $^+$  519.9744, found 519.9747.

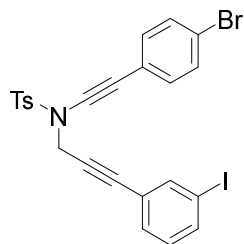

**N-((4-bromophenyl)ethynyl)-N-(3-(3-iodophenyl)prop-2-yn-1-yl)-4-methylbenzenesulfonamide (1t)**

Compound **1t** was obtained as yellow solid;  $R_f = 0.57$  (petroleum ether : ethyl acetate = 5 : 1);  $^1\text{H}$  NMR (400 MHz,  $\text{CDCl}_3$ , TMS)  $\delta$  7.89 (d,  $J = 8.4$  Hz, 2H), 7.62 (d,  $J = 8.0$  Hz, 1H), 7.45-7.41 (m, 3H), 7.32 (d,  $J = 8.4$  Hz, 2H), 7.24 (d,  $J = 8.4$  Hz, 2H), 7.14 (d,  $J = 7.6$  Hz, 1H), 6.98 (t,  $J = 7.6$  Hz, 1H), 4.55 (s, 2H), 2.41 (s, 3H);  $^{13}\text{C}$  NMR (101 MHz,  $\text{CDCl}_3$ )  $\delta$  145.3, 140.3, 137.8, 134.3, 133.1, 131.7, 130.8, 129.84, 129.79, 128.3, 124.0, 122.3, 121.6, 93.5, 84.9, 83.1, 82.6, 70.5, 42.8, 21.9; HRMS (ESI)  $m/z$  calcd for  $\text{C}_{24}\text{H}_{17}\text{BrINO}_2\text{SNa}^+$  ( $\text{M}+\text{Na}$ ) $^+$  611.9100, found 611.9103.

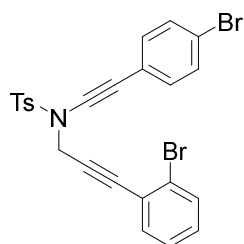

**N-((4-bromophenyl)ethynyl)-N-(3-(2-bromophenyl)prop-2-yn-1-yl)-4-methylbenzenesulfonamide (1u)**

Compound **1u** was obtained as yellow solid;  $R_f = 0.61$  (petroleum ether : ethyl acetate = 5 : 1);  $^1\text{H}$  NMR (400 MHz,  $\text{CDCl}_3$ , TMS)  $\delta$  7.89 (d,  $J = 8.0$  Hz, 2H), 7.52 (d,  $J = 7.6$  Hz, 1H), 7.42 (d,  $J = 8.4$  Hz, 2H), 7.27-7.24 (m, 4H), 7.22 -7.13 (m, 3H), 4.61 (s, 2H), 2.31 (s, 3H);  $^{13}\text{C}$  NMR (101 MHz,  $\text{CDCl}_3$ )  $\delta$  145.2, 134.2, 133.7, 133.1, 132.5, 131.7, 130.0, 129.8, 128.4, 127.0, 125.5, 124.3, 122.3, 121.8, 85.8, 85.1, 83.2, 70.6, 42.9, 21.7; HRMS (ESI)  $m/z$  calcd for  $\text{C}_{24}\text{H}_{17}\text{Br}_2\text{NO}_2\text{SNa}^+$  ( $\text{M}+\text{Na}$ ) $^+$  565.9219, found 565.9222.

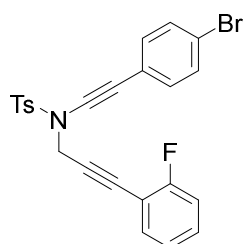



**N-((4-bromophenyl)ethynyl)-N-(3-(2-fluorophenyl)prop-2-yn-1-yl)-4-methylbenzenesulfonamide (1v)**

Compound **1v** was obtained as yellow solid;  $R_f = 0.61$  (petroleum ether : ethyl acetate = 5 : 1);  $^1\text{H}$  NMR (400 MHz,  $\text{CDCl}_3$ , TMS)  $\delta$  7.89 (d,  $J = 8.4$  Hz, 2H), 7.42 (d,  $J = 8.4$  Hz, 2H), 7.32-7.24 (m, 5H), 7.17-7.13 (m, 1H), 7.06-7.01 (m, 2H), 4.59 (s, 2H), 2.33 (s, 3H);  $^{13}\text{C}$  NMR (101 MHz,  $\text{CDCl}_3$ )  $\delta$  162.9 (d,  $J = 253.5$  Hz), 145.2, 134.2, 133.7 (d,  $J = 1.0$  Hz), 133.1, 131.6, 130.7 (d,  $J = 8.0$  Hz), 129.8, 128.3, 124.0 (d,  $J = 3.7$  Hz), 122.3, 121.7, 115.6 (d,  $J = 20.8$  Hz), 110.7 (d,  $J = 15.8$  Hz), 86.3 (d,  $J = 3.2$  Hz), 83.1, 80.2, 70.6, 42.9, 21.7;  $^{19}\text{F}$  NMR (376 MHz,  $\text{CDCl}_3$ )  $\delta$  -109.63; HRMS (ESI)  $m/z$  calcd for  $\text{C}_{24}\text{H}_{17}\text{BrFNO}_2\text{SNa}^+$  ( $\text{M}+\text{Na}$ ) $^+$  504.0040, found 504.0045.

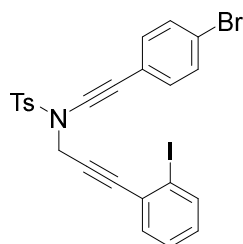

**N-((4-bromophenyl)ethynyl)-N-(3-(2-iodophenyl)prop-2-yn-1-yl)-4-methylbenzenesulfonamide (1w)**

Compound **1w** was obtained as yellow solid;  $R_f = 0.62$  (petroleum ether : ethyl acetate = 5 : 1);  $^1\text{H}$  NMR (400 MHz,  $\text{CDCl}_3$ , TMS)  $\delta$  7.89 (d,  $J = 8.0$  Hz, 2H), 7.72 (d,  $J = 8.0$  Hz, 1H), 7.37 (d,  $J = 8.0$  Hz, 2H), 7.25-7.18 (m, 5H), 7.11 (d,  $J = 7.6$  Hz, 1H), 6.93 (t,  $J = 7.6$  Hz, 1H), 4.61 (s, 2H), 2.25 (s, 3H);  $^{13}\text{C}$  NMR (101 MHz,  $\text{CDCl}_3$ )  $\delta$  145.2, 138.7, 134.1, 133.0, 132.9, 131.5, 129.9, 129.7, 128.6, 128.2, 127.7, 122.1, 121.7, 100.4, 88.3, 84.9, 83.3, 70.6, 42.8, 21.6; HRMS (ESI)  $m/z$  calcd for  $\text{C}_{24}\text{H}_{17}\text{BrINO}_2\text{SNa}^+$  ( $\text{M}+\text{Na}$ ) $^+$  611.9100, found 611.9105.

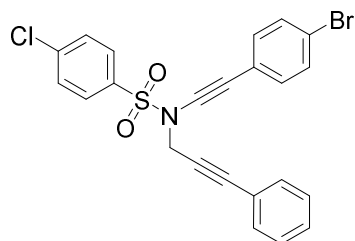

**N-((4-bromophenyl)ethynyl)-4-chloro-N-(3-phenylprop-2-yn-1-yl)benzenesulfonamide (1x)**

Compound **1x** was obtained as yellow solid;  $R_f = 0.62$  (petroleum ether : ethyl acetate = 5 : 1);  $^1\text{H}$  NMR (400 MHz,  $\text{CDCl}_3$ , TMS)  $\delta$  7.95 (d,  $J = 8.8$  Hz, 2H), 7.47-7.41 (m, 4H), 7.34-7.23 (m, 5H), 7.15 (d,  $J = 7.2$  Hz, 2H), 4.58 (s, 2H);  $^{13}\text{C}$  NMR (101 MHz,  $\text{CDCl}_3$ )  $\delta$  140.8, 135.7, 133.1, 131.71,

131.68, 129.7, 129.5, 129.0, 128.5, 122.5, 121.7, 121.4, 87.1, 82.7, 80.8, 70.7, 43.2; HRMS (ESI)  $m/z$  calcd for  $C_{23}H_{15}BrClNO_2SNa^+$  ( $M+Na$ ) $^+$  505.9588, found 505.9594.

### General procedure for the synthesis of pyrrol

To a sealed Schlenk tube was added diyne (0.2 mmol),  $Cy_3PAuNTf_2$  (7.6mg, 0.01 mmol),  $H_2O$  (0.6 mmol, 10.8 mg) and this mixture was treated with dry  $CH_3NO_2$  (2 mL) under air. The solution was heated at 50 °C for 1h. The resulting solution was cooled to room temperature, and filtered through Celite with ethyl acetate as the eluent. The solvents were evaporated under reduced pressure and the residue was purified by column chromatography on silica gel to afford the products.

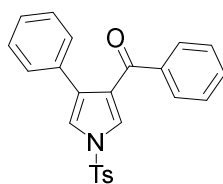

### phenyl(4-phenyl-1-tosyl-1H-pyrrol-3-yl)methanone (2a)

Compound **2a** was obtained as yellow solid, 44.3 mg, in 55% yield;  $R_f = 0.4$  (petroleum ether : dichloromethane = 1 : 1);  $^1H$  NMR (400 MHz,  $CDCl_3$ , TMS)  $\delta$  7.83-7.79 (m, 4H), 7.55 (d,  $J = 2.0$  Hz, 1H), 7.51 (t,  $J = 7.6$  Hz, 1H), 7.38 (t,  $J = 7.6$  Hz, 2H), 7.34-7.21 (m, 8H), 2.42 (s, 3H);  $^{13}C$  NMR (101 MHz,  $CDCl_3$ )  $\delta$  190.8, 146.2, 138.4, 135.2, 132.9, 132.7, 130.55, 130.52, 129.8, 128.6, 128.5, 128.3, 127.52, 127.46, 126.7, 126.0, 119.3, 21.9.; HRMS (ESI)  $m/z$  calcd for  $C_{24}H_{19}NO_3SNa^+$  ( $M+Na$ ) $^+$  424.0978, found 424.0978.

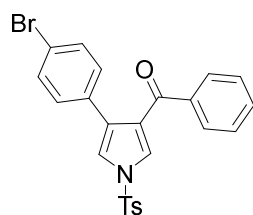

### (4-(4-bromophenyl)-1-tosyl-1H-pyrrol-3-yl)(phenyl)methanone (2b)

Compound **2b** was obtained as pale yellow solid, 68.6 mg, in 71% yield;  $R_f = 0.41$  (petroleum ether : dichloromethane = 1 : 1);  $^1H$  NMR (400 MHz,  $CDCl_3$ , TMS)  $\delta$  7.83-7.79 (m, 4H), 7.57-7.54 (m, 2H), 7.44-7.33 (m, 6H), 7.27-7.26 (m, 1H), 7.19 (d,  $J = 8.0$  Hz, 2H), 2.42 (s, 3H);  $^{13}C$  NMR (101 MHz,  $CDCl_3$ )  $\delta$  190.5, 146.3, 138.3, 134.9, 133.0, 131.6, 131.4, 130.5, 130.2, 129.7, 129.3, 128.5, 127.4, 127.0, 125.5, 121.6, 119.4, 21.8; HRMS (ESI)  $m/z$  calcd for  $C_{24}H_{18}BrNO_3SNa^+$  ( $M+Na$ ) $^+$  502.0083, found 502.0086.

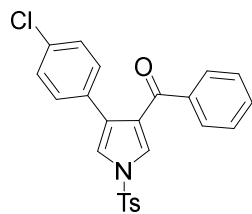

**(4-(4-chlorophenyl)-1-tosyl-1H-pyrrol-3-yl)(phenyl)methanone (2c)**

Compound **2c** was obtained as pale yellow solid, 53.8 mg, in 62% yield;  $R_f = 0.41$  (petroleum ether : dichloromethane = 1 : 1);  $^1\text{H NMR}$  (400 MHz,  $\text{CDCl}_3$ , TMS)  $\delta$  7.83-7.79 (m, 4H), 7.57-7.54 (m, 2H), 7.42 (t,  $J = 7.6$  Hz, 2H), 7.34 (d,  $J = 8.0$  Hz, 2H), 7.26-7.21 (m, 5H), 2.43 (s, 3H);  $^{13}\text{C NMR}$  (101 MHz,  $\text{CDCl}_3$ )  $\delta$  190.6, 146.3, 138.3, 135.0, 133.4, 133.0, 131.2, 130.5, 129.9, 129.7, 129.3, 128.55, 128.47, 127.4, 127.0, 125.6, 119.5, 21.8; HRMS (ESI)  $m/z$  calcd for  $\text{C}_{24}\text{H}_{18}\text{ClNO}_3\text{SNa}^+$  ( $\text{M}+\text{Na}$ ) $^+$  458.0588, found 458.0589.

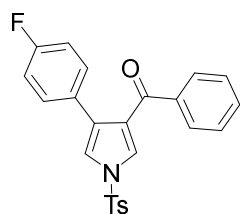

**(4-(4-fluorophenyl)-1-tosyl-1H-pyrrol-3-yl)(phenyl)methanone (2d)**

Compound **2d** was obtained as pale yellow solid, 54.5 mg, in 65% yield;  $R_f = 0.4$  (petroleum ether : dichloromethane = 1 : 1);  $^1\text{H NMR}$  (400 MHz,  $\text{CDCl}_3$ , TMS)  $\delta$  7.83-7.78 (m, 4H), 7.56-7.53 (m, 2H), 7.41 (t,  $J = 7.6$  Hz, 2H), 7.35 (d,  $J = 8.0$  Hz, 2H), 7.30-7.27 (m, 2H), 7.24 (d,  $J = 2.4$  Hz, 1H), 6.97-6.93 (m, 2H), 2.43 (s, 3H);  $^{13}\text{C NMR}$  (101 MHz,  $\text{CDCl}_3$ )  $\delta$  190.7, 162.3 (d,  $J = 247.6$  Hz), 146.3, 138.4, 135.0, 132.9, 130.5, 130.3 (d,  $J = 8.2$  Hz), 129.7, 129.5, 128.7 (d,  $J = 3.4$  Hz), 128.5, 127.4, 126.9, 125.7, 119.3, 115.2 (d,  $J = 21.6$  Hz), 21.8;  $^{19}\text{F NMR}$  (376 MHz,  $\text{CDCl}_3$ )  $\delta$  -114.8; HRMS (ESI)  $m/z$  calcd for  $\text{C}_{24}\text{H}_{18}\text{FNO}_3\text{SNa}^+$  ( $\text{M}+\text{Na}$ ) $^+$  442.0884, found 442.0884.

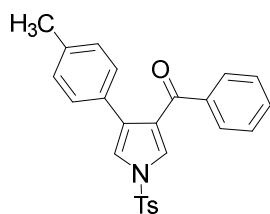

**phenyl(4-(p-tolyl)-1-tosyl-1H-pyrrol-3-yl)methanone (2e)**

Compound **2e** was obtained as yellow solid, 44.0 mg, in 53% yield;  $R_f = 0.3$  (petroleum ether : dichloromethane = 1 : 1);  $^1\text{H NMR}$  (400 MHz,  $\text{CDCl}_3$ , TMS)  $\delta$  7.82-7.80 (m, 4H), 7.55-7.51 (m,

2H), 7.41 (t,  $J = 7.6$  Hz, 2H), 7.33 (d,  $J = 8.4$  Hz, 2H), 7.25-7.24 (m, 1H), 7.20 (d,  $J = 8.0$  Hz, 2H), 7.07 (d,  $J = 8.0$  Hz, 2H), 2.43 (s, 3H), 2.30 (s, 3H);  $^{13}\text{C}$  NMR (101 MHz,  $\text{CDCl}_3$ )  $\delta$  190.8, 146.1, 138.5, 137.3, 135.2, 132.8, 130.6, 130.5, 129.8, 129.7, 129.1, 128.5, 127.4, 126.7, 126.0, 119.1, 21.8, 21.3. HRMS (ESI)  $m/z$  calcd for  $\text{C}_{25}\text{H}_{21}\text{NO}_3\text{SNa}^+$  ( $\text{M}+\text{Na}$ ) $^+$  438.1134, found 438.1136.

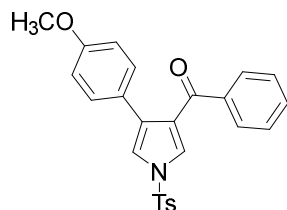

**(4-(4-methoxyphenyl)-1-tosyl-1H-pyrrol-3-yl)(phenyl)methanone (2f)**

Compound **2f** was obtained as yellow solid, 45.1 mg, in 52% yield;  $R_f = 0.25$  (petroleum ether : dichloromethane = 1 : 1);  $^1\text{H}$  NMR (400 MHz,  $\text{CDCl}_3$ , TMS)  $\delta$  7.82-7.79 (m, 4H), 7.55-7.52 (m, 2H), 7.40 (t,  $J = 7.6$  Hz, 2H), 7.33 (d,  $J = 8.4$  Hz, 2H), 7.26-7.21 (m, 3H), 6.80 (d,  $J = 8.4$  Hz, 2H), 3.76 (s, 3H), 2.42 (s, 3H);  $^{13}\text{C}$  NMR (101 MHz,  $\text{CDCl}_3$ )  $\delta$  190.9, 159.1, 146.1, 138.5, 135.1, 132.8, 130.5, 130.2, 129.8, 129.7, 128.4, 127.4, 126.7, 125.8, 125.0, 118.8, 113.8, 55.3, 21.8; HRMS (ESI)  $m/z$  calcd for  $\text{C}_{25}\text{H}_{21}\text{NO}_4\text{SNa}^+$  ( $\text{M}+\text{Na}$ ) $^+$  454.1084, found 454.1085.

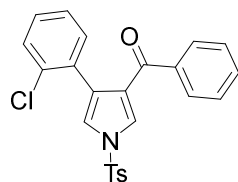

**(4-(2-chlorophenyl)-1-tosyl-1H-pyrrol-3-yl)(phenyl)methanone (2g)**

Compound **2g** was obtained as yellow solid, 49.4 mg, in 57% yield;  $R_f = 0.4$  (petroleum ether : dichloromethane = 1 : 1);  $^1\text{H}$  NMR (400 MHz,  $\text{CDCl}_3$ , TMS)  $\delta$  7.83-7.78 (m, 4H), 7.56-7.50 (m, 2H), 7.40 (t,  $J = 7.6$  Hz, 2H), 7.35 (d,  $J = 8.4$  Hz, 2H), 7.32-7.30 (m, 1H), 7.28-7.25 (m, 2H), 7.22-7.19 (m, 2H), 2.43 (s, 3H);  $^{13}\text{C}$  NMR (101 MHz,  $\text{CDCl}_3$ )  $\delta$  190.2, 146.2, 138.0, 135.1, 133.4, 132.7, 132.2, 131.4, 130.5, 129.64, 129.62, 129.0, 128.4, 127.4, 127.3, 127.1, 126.7, 125.9, 120.7, 21.8; HRMS (ESI)  $m/z$  calcd for  $\text{C}_{24}\text{H}_{18}\text{ClNO}_3\text{SNa}^+$  ( $\text{M}+\text{Na}$ ) $^+$  458.0588, found 458.0590.

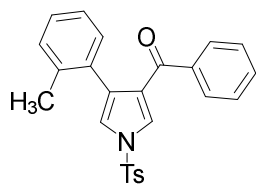

**phenyl(4-(o-tolyl)-1-tosyl-1H-pyrrol-3-yl)methanone (2h)**

Compound **2h** was obtained as pale yellow solid, 49.3 mg, in 59% yield;  $R_f = 0.4$  (petroleum ether : dichloromethane = 1 : 1);  $^1\text{H NMR}$  (400 MHz,  $\text{CDCl}_3$ , TMS)  $\delta$  7.81 (d,  $J = 8.4$  Hz, 2H), 7.76 (d,  $J = 7.6$  Hz, 2H), 7.58 (d,  $J = 2.0$  Hz, 1H), 7.52 (t,  $J = 7.6$  Hz, 1H), 7.41-7.34 (m, 4H), 7.20-7.11 (m, 5H), 2.44 (s, 3H), 2.10 (s, 3H);  $^{13}\text{C NMR}$  (101 MHz,  $\text{CDCl}_3$ )  $\delta$  190.4, 146.1, 138.3, 136.5, 135.3, 132.7, 132.6, 130.5, 130.2, 130.0, 129.7, 129.5, 128.4, 127.9, 127.4, 127.1, 126.3, 125.6, 120.1, 21.9, 20.4; HRMS (ESI)  $m/z$  calcd for  $\text{C}_{25}\text{H}_{21}\text{NO}_3\text{SNa}^+$  ( $\text{M}+\text{Na}$ ) $^+$  438.1134, found 438.1134.

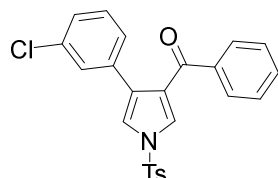

#### (4-(3-chlorophenyl)-1-tosyl-1H-pyrrol-3-yl)(phenyl)methanone (**2i**)

Compound **2i** was obtained as yellow solid, 50.0 mg, in 57% yield;  $R_f = 0.4$  (petroleum ether : dichloromethane = 1 : 1);  $^1\text{H NMR}$  (400 MHz,  $\text{CDCl}_3$ , TMS)  $\delta$  7.83-7.79 (m, 4H), 7.56-7.52 (m, 2H), 7.42 (t,  $J = 7.6$  Hz, 2H), 7.36-7.32 (m, 3H), 7.27 (d,  $J = 2.4$  Hz, 1H), 7.21-7.18 (m, 3H), 2.42 (s, 3H);  $^{13}\text{C NMR}$  (101 MHz,  $\text{CDCl}_3$ )  $\delta$  190.5, 146.3, 138.3, 134.9, 134.5, 134.1, 132.9, 130.5, 129.6, 129.5, 129.1, 128.53, 128.51, 127.5, 127.4, 126.99, 126.98, 125.6, 119.7, 21.8; HRMS (ESI)  $m/z$  calcd for  $\text{C}_{24}\text{H}_{18}\text{ClNO}_3\text{SNa}^+$  ( $\text{M}+\text{Na}$ ) $^+$  458.0588, found 458.0590.

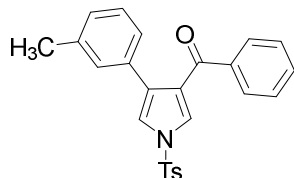

#### phenyl(4-(m-tolyl)-1-tosyl-1H-pyrrol-3-yl)methanone (**2j**)

Compound **2j** was obtained as yellow solid, 42.7 mg, in 51% yield;  $R_f = 0.4$  (petroleum ether : dichloromethane = 1 : 1);  $^1\text{H NMR}$  (400 MHz,  $\text{CDCl}_3$ , TMS)  $\delta$  7.83-7.78 (m, 4H), 7.54-7.51 (m, 2H), 7.40 (t,  $J = 7.6$  Hz, 2H), 7.34 (d,  $J = 8.0$  Hz, 2H), 7.25 (d,  $J = 2.8$  Hz, 1H), 7.16-7.13 (m, 1H), 7.10-7.08 (m, 2H), 7.03 (d,  $J = 7.2$  Hz, 1H), 2.44 (s, 3H), 2.27 (s, 3H);  $^{13}\text{C NMR}$  (101 MHz,  $\text{CDCl}_3$ )  $\delta$  190.9, 146.2, 138.5, 137.9, 135.2, 132.8, 132.5, 130.7, 130.5, 129.8, 129.3, 128.4, 128.29, 128.25, 127.4, 126.7, 126.1, 125.8, 119.3, 21.9, 21.5; HRMS (ESI)  $m/z$  calcd for  $\text{C}_{25}\text{H}_{21}\text{NO}_3\text{SNa}^+$  ( $\text{M}+\text{Na}$ ) $^+$  438.1134, found 438.1134.

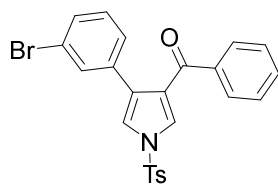

**(4-(3-bromophenyl)-1-tosyl-1H-pyrrol-3-yl)(phenyl)methanone (2k)**

Compound **2k** was obtained as yellow solid, 60.7 mg, in 63% yield;  $R_f = 0.41$  (petroleum ether : dichloromethane = 1 : 1);  $^1\text{H NMR}$  (400 MHz,  $\text{CDCl}_3$ , TMS)  $\delta$  7.83-7.78 (m, 4H), 7.56-7.53 (m, 2H), 7.47 (s, 1H), 7.42 (t,  $J = 7.6$  Hz, 2H), 7.35 (d,  $J = 8.0$  Hz, 3H), 7.27-7.22 (m, 2H), 7.12 (t,  $J = 8.0$  Hz, 1H), 2.43 (s, 3H);  $^{13}\text{C NMR}$  (101 MHz,  $\text{CDCl}_3$ )  $\delta$  190.5, 146.4, 138.3, 134.9, 134.8, 133.0, 131.4, 130.6, 130.4, 129.74, 129.66, 129.0, 128.53, 127.48, 127.45, 127.0, 125.6, 122.3, 119.7, 21.8; HRMS (ESI)  $m/z$  calcd for  $\text{C}_{24}\text{H}_{18}\text{BrNO}_3\text{SNa}^+$  ( $\text{M}+\text{Na}$ ) $^+$  502.0083, found 502.0087.

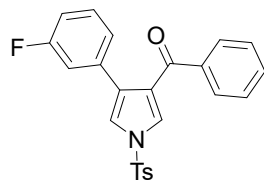

**(4-(3-fluorophenyl)-1-tosyl-1H-pyrrol-3-yl)(phenyl)methanone (2l)**

Compound **2l** was obtained as yellow solid, 47.5 mg, in 57% yield;  $R_f = 0.41$  (petroleum ether : dichloromethane = 1 : 1);  $^1\text{H NMR}$  (400 MHz,  $\text{CDCl}_3$ , TMS)  $\delta$  7.83-7.79 (m, 4H), 7.57-7.53 (m, 2H), 7.42 (t,  $J = 7.6$  Hz, 2H), 7.35 (d,  $J = 8.0$  Hz, 2H), 7.28 (d,  $J = 2.4$  Hz, 1H), 7.25-7.18 (m, 1H), 7.08-7.03 (m, 2H), 6.94-6.90 (m, 1H), 2.43 (s, 3H);  $^{13}\text{C NMR}$  (101 MHz,  $\text{CDCl}_3$ )  $\delta$  190.5, 162.6 (d,  $J = 246.3$  Hz), 146.3, 138.3, 135.0, 134.9 (d,  $J = 8.4$  Hz), 133.0, 130.5, 129.8, 129.7, 129.3 (d,  $J = 2.3$  Hz), 128.5, 127.5, 126.9, 125.7, 124.4 (d,  $J = 2.8$  Hz), 119.7, 115.6 (d,  $J = 22.4$  Hz), 114.3 (d,  $J = 21.1$  Hz), 21.8;  $^{19}\text{F NMR}$  (376 MHz,  $\text{CDCl}_3$ )  $\delta$  -113.5; HRMS (ESI)  $m/z$  calcd for  $\text{C}_{24}\text{H}_{18}\text{FNO}_3\text{SNa}^+$  ( $\text{M}+\text{Na}$ ) $^+$  442.0884, found 442.0882.

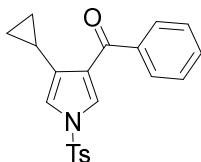

**(4-cyclopropyl-1-tosyl-1H-pyrrol-3-yl)(phenyl)methanone (2m)**

Compound **2m** was obtained as yellow oil 46.5 mg, in 64% yield;  $R_f = 0.55$  (petroleum ether : dichloromethane = 1 : 1);  $^1\text{H NMR}$  (400 MHz,  $\text{CDCl}_3$ , TMS)  $\delta$  7.81-7.79 (m, 2H), 7.73 (d,  $J = 8.4$  Hz, 2H), 7.58 (t,  $J = 7.6$  Hz, 1H), 7.50-7.46 (m, 2H), 7.41 (d,  $J = 2.4$  Hz, 1H), 7.31 (d,  $J = 8.4$  Hz,

2H), 6.79 (d,  $J = 1.6$  Hz, 1H), 2.41 (s, 3H), 2.23-2.16 (m, 1H), 0.90-0.85 (m, 2H), 0.54- 0.50 (m, 2H);  $^{13}\text{C}$  NMR (101 MHz,  $\text{CDCl}_3$ )  $\delta$  191.3, 145.9, 139.3, 135.2, 133.6, 132.4, 130.4, 129.4, 128.5, 127.2, 127.1, 116.6, 21.8, 8.5, 7.2. HRMS (ESI)  $m/z$  calcd for  $\text{C}_{21}\text{H}_{19}\text{NO}_3\text{SNa}^+$  ( $\text{M}+\text{Na}$ ) $^+$  388.0978, found 388.0978.

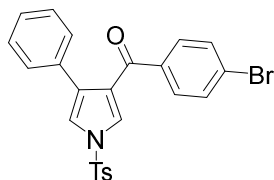

#### (4-bromophenyl)(4-phenyl-1-tosyl-1H-pyrrol-3-yl)methanone (2n)

Compound **2n** was obtained as yellow solid, 34.0mg, in 35% yield;  $R_f = 0.4$  (petroleum ether : dichloromethane = 1 : 1);  $^1\text{H}$  NMR (400 MHz,  $\text{CDCl}_3$ , TMS)  $\delta$  7.82 (d,  $J = 8.0$  Hz, 2H), 7.65 (d,  $J = 8.0$  Hz, 2H), 7.54-7.51 (m, 3H), 7.35 (d,  $J = 8.0$  Hz, 2H), 7.27-7.22 (m, 6H), 2.43 (s, 3H);  $^{13}\text{C}$  NMR (101 MHz,  $\text{CDCl}_3$ )  $\delta$  189.7, 146.3, 137.1, 135.0, 132.5, 131.7, 131.2, 130.5, 130.3, 128.6, 128.4, 127.9, 127.6, 127.5, 126.5, 125.6, 119.4, 21.8; HRMS (ESI)  $m/z$  calcd for  $\text{C}_{24}\text{H}_{18}\text{BrNO}_3\text{SNa}^+$  ( $\text{M}+\text{Na}$ ) $^+$  502.0083, found 502.0085.

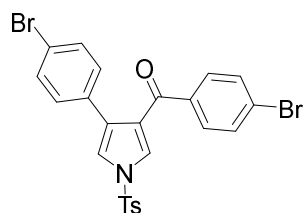

#### (4-bromophenyl)(4-(4-bromophenyl)-1-tosyl-1H-pyrrol-3-yl)methanone (2o)

Compound **2o** was obtained as yellow solid, 66.8 mg, in 60% yield;  $R_f = 0.4$  (petroleum ether : dichloromethane = 1 : 1);  $^1\text{H}$  NMR (400 MHz,  $\text{CDCl}_3$ , TMS)  $\delta$  7.82 (d,  $J = 8.0$  Hz, 2H), 7.66 (d,  $J = 8.4$  Hz, 2H), 7.56 (d,  $J = 8.4$  Hz, 2H), 7.52 (d,  $J = 2.0$  Hz, 1H), 7.39 (d,  $J = 8.4$  Hz, 2H), 7.35 (d,  $J = 8.0$  Hz, 2H), 7.26 (d,  $J = 2.4$  Hz, 1H), 7.17 (d,  $J = 8.0$  Hz, 2H), 2.43 (s, 3H);  $^{13}\text{C}$  NMR (101 MHz,  $\text{CDCl}_3$ )  $\delta$  189.5, 146.5, 137.1, 134.9, 131.9, 131.55, 131.51, 131.2, 130.6, 130.2, 129.3, 128.2, 127.5, 126.9, 125.3, 121.8, 119.6, 21.9; HRMS (ESI)  $m/z$  calcd for  $\text{C}_{24}\text{H}_{17}\text{Br}_2\text{NO}_3\text{SNa}^+$  ( $\text{M}+\text{Na}$ ) $^+$  581.9168, found 581.9168.

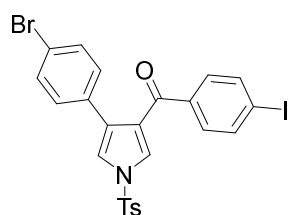

#### (4-(4-bromophenyl)-1-tosyl-1H-pyrrol-3-yl)(4-iodophenyl)methanone (2p)

Compound **2p** was obtained as yellow solid, 81.0 mg, in 67% yield;  $R_f = 0.40$  (petroleum ether : dichloromethane = 1 : 1);  $^1\text{H NMR}$  (400 MHz,  $\text{CDCl}_3$ , TMS)  $\delta$  7.82 (d,  $J = 8.0$  Hz, 2H), 7.78 (d,  $J = 8.0$  Hz, 2H), 7.50 (d,  $J = 8.4$  Hz, 3H), 7.39 (d,  $J = 8.0$  Hz, 2H), 7.35 (d,  $J = 8.4$  Hz, 2H), 7.26 (s, 1H), 7.17 (d,  $J = 8.0$  Hz, 2H), 2.43 (s, 3H);  $^{13}\text{C NMR}$  (101 MHz,  $\text{CDCl}_3$ )  $\delta$  189.7, 146.4, 137.9, 137.6, 134.9, 131.52, 131.49, 131.1, 130.6, 130.2, 129.3, 127.5, 127.0, 125.2, 121.8, 119.6, 100.8, 21.9; HRMS (ESI)  $m/z$  calcd for  $\text{C}_{24}\text{H}_{17}\text{BrINO}_3\text{SNa}^+$  ( $\text{M}+\text{Na}$ ) $^+$  627.9049, found 627.9050.

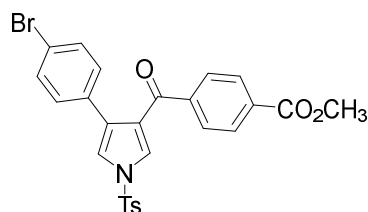

#### methyl 4-(4-(4-bromophenyl)-1-tosyl-1H-pyrrole-3-carbonyl)benzoate (2q)

Compound **2q** was obtained as yellow solid, 58.6 mg, in 54% yield;  $R_f = 0.38$  (petroleum ether : dichloromethane = 1 : 1);  $^1\text{H NMR}$  (400 MHz,  $\text{CDCl}_3$ , TMS)  $\delta$  8.08 (d,  $J = 8.0$  Hz, 2H), 7.83 (d,  $J = 2.0$  Hz, 2H), 7.81 (d,  $J = 2.0$  Hz, 2H), 7.54 (d,  $J = 2.4$  Hz, 1H), 7.39 (d,  $J = 8.4$  Hz, 2H), 7.36 (d,  $J = 8.4$  Hz, 2H), 7.27 (d,  $J = 2.4$  Hz, 1H), 7.19 (d,  $J = 8.0$  Hz, 2H), 3.95 (s, 3H), 2.44 (s, 3H);  $^{13}\text{C NMR}$  (101 MHz,  $\text{CDCl}_3$ )  $\delta$  189.9, 166.3, 146.5, 141.9, 134.8, 133.7, 131.5, 130.6, 130.3, 129.7, 129.4, 129.2, 127.5, 127.4, 125.2, 121.8, 119.7, 52.6, 21.9; HRMS (ESI)  $m/z$  calcd for  $\text{C}_{26}\text{H}_{20}\text{BrNO}_5\text{SNa}^+$  ( $\text{M}+\text{Na}$ ) $^+$  560.0138, found 560.0140.

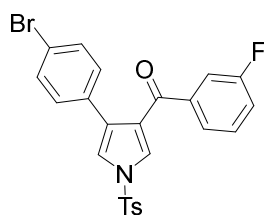

#### (4-(4-bromophenyl)-1-tosyl-1H-pyrrol-3-yl)(3-fluorophenyl)methanone (2r)

Compound **2r** was obtained as yellow solid, 53.8 mg, in 55% yield;  $R_f = 0.41$  (petroleum ether : dichloromethane = 1 : 1);  $^1\text{H NMR}$  (400 MHz,  $\text{CDCl}_3$ , TMS)  $\delta$  7.83 (d,  $J = 8.4$  Hz, 2H), 7.58-7.56 (m, 2H), 7.47 (d,  $J = 9.2$  Hz, 1H), 7.42-7.35 (m, 5H), 7.27- 7.23 (m, 2H), 7.17 (d,  $J = 8.4$  Hz, 2H), 2.44 (s, 3H);  $^{13}\text{C NMR}$  (101 MHz,  $\text{CDCl}_3$ )  $\delta$  189.1, 162.6 (d,  $J = 249.4\text{Hz}$ ), 146.5, 140.4 (d,  $J = 6.3$  Hz), 134.8, 131.49, 131.46, 130.6, 130.25 (d,  $J = 7.6$  Hz), 130.24, 129.3, 127.5, 127.1, 125.5 (d,  $J = 2.9$  Hz), 125.1, 121.8, 120.0 (d,  $J = 21.4$  Hz), 119.6, 116.3 (d,  $J = 22.5$  Hz), 21.8;  $^{19}\text{F NMR}$  (376 MHz,  $\text{CDCl}_3$ )  $\delta$  -111.7; HRMS (ESI)  $m/z$  calcd for  $\text{C}_{24}\text{H}_{17}\text{BrFNO}_3\text{SNa}^+$  ( $\text{M}+\text{Na}$ ) $^+$  519.9990, found 519.9992.



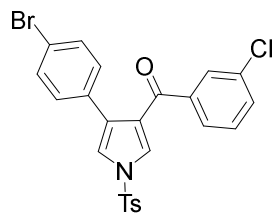

**(4-(4-bromophenyl)-1-tosyl-1H-pyrrol-3-yl)(3-chlorophenyl)methanone (2s)**

Compound **2s** was obtained as yellow solid, 47.6mg, in 46% yield;  $R_f = 0.42$  (petroleum ether : dichloromethane = 1 : 1);  $^1\text{H NMR}$  (400 MHz,  $\text{CDCl}_3$ , TMS)  $\delta$  7.83 (d,  $J = 8.4$  Hz, 2H), 7.72 (s, 1H), 7.65 (d,  $J = 7.6$  Hz, 1H), 7.55 (d,  $J = 2.4$  Hz, 1H), 7.52 (d,  $J = 8.0$  Hz, 1H), 7.41-7.34 (m, 5H), 7.26 (d,  $J = 2.4$  Hz, 1H), 7.17 (d,  $J = 8.4$  Hz, 2H), 2.44 (s, 3H);  $^{13}\text{C NMR}$  (101 MHz,  $\text{CDCl}_3$ )  $\delta$  189.1, 146.5, 139.9, 134.9, 134.8, 132.9, 131.51, 131.48, 130.6, 130.3, 129.9, 129.6, 129.3, 127.8, 127.5, 127.2, 125.2, 121.8, 119.6, 21.9; HRMS (ESI)  $m/z$  calcd for  $\text{C}_{24}\text{H}_{17}\text{BrClNO}_3\text{SNa}^+$  ( $\text{M}+\text{Na}$ ) $^+$  535.9693, found 535.9697.

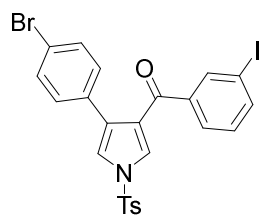

**(4-(4-bromophenyl)-1-tosyl-1H-pyrrol-3-yl)(3-iodophenyl)methanone (2t)**

Compound **2t** was obtained as yellow solid, 59.4 mg, in 50% yield;  $R_f = 0.45$  (petroleum ether : dichloromethane = 1 : 1);  $^1\text{H NMR}$  (400 MHz,  $\text{CDCl}_3$ , TMS)  $\delta$  8.05 (s, 1H), 7.86-7.82 (m, 3H), 7.73 (d,  $J = 7.6$  Hz, 1H), 7.55 (d,  $J = 2.0$  Hz, 1H), 7.40-7.36 (m, 4H), 7.26 (d,  $J = 2.0$  Hz, 1H), 7.17-7.14 (m, 3H), 2.44 (s, 3H);  $^{13}\text{C NMR}$  (101 MHz,  $\text{CDCl}_3$ )  $\delta$  188.9, 146.4, 141.6, 140.1, 138.5, 134.8, 131.5, 131.4, 130.6, 130.25, 130.22, 129.2, 128.7, 127.5, 127.2, 125.1, 121.8, 119.6, 94.2, 21.9; HRMS (ESI)  $m/z$  calcd for  $\text{C}_{24}\text{H}_{17}\text{BrINO}_3\text{SNa}^+$  ( $\text{M}+\text{Na}$ ) $^+$  627.9049, found 627.9051.

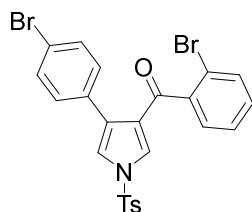

**(2-bromophenyl)(4-(4-bromophenyl)-1-tosyl-1H-pyrrol-3-yl)methanone (2u)**

Compound **2u** was obtained as yellow solid, 54.6 mg, in 49% yield;  $R_f = 0.38$  (petroleum ether : dichloromethane = 1 : 1);  $^1\text{H NMR}$  (400 MHz,  $\text{CDCl}_3$ , TMS)  $\delta$  7.79 (d,  $J = 8.4$  Hz, 2H), 7.57 (d,  $J$

= 7.2 Hz, 1H), 7.42-7.40 (m, 3H), 7.36-7.32 (m, 4H), 7.31-7.26 (m, 3H), 7.17 (d,  $J = 2.4$  Hz, 1H), 2.43 (s, 3H);  $^{13}\text{C}$  NMR (101 MHz,  $\text{CDCl}_3$ )  $\delta$  190.0, 146.5, 141.1, 134.8, 133.5, 131.6, 131.3, 131.2, 130.61, 130.58, 129.39, 129.37, 129.0, 127.5, 127.4, 125.7, 121.8, 120.1, 119.9, 21.9; HRMS (ESI)  $m/z$  calcd for  $\text{C}_{24}\text{H}_{17}\text{Br}_2\text{NO}_3\text{SNa}^+$  ( $\text{M}+\text{Na}$ ) $^+$  581.9168, found 581.9169.

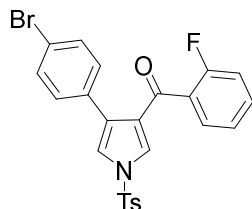

#### (4-(4-bromophenyl)-1-tosyl-1H-pyrrol-3-yl)(2-fluorophenyl)methanone (2v)

Compound **2v** was obtained as pale yellow solid, 49.8 mg, in 50% yield;  $R_f = 0.43$  (petroleum ether : dichloromethane = 1 : 1);  $^1\text{H}$  NMR (400 MHz,  $\text{CDCl}_3$ , TMS)  $\delta$  7.80 (d,  $J = 8.4$  Hz, 2H), 7.567-7.565 (m, 1H), 7.52-7.43 (m, 2H), 7.39-7.34 (m, 4H), 7.22-7.16 (m, 4H), 7.04 (t,  $J = 9.2$  Hz, 1H), 2.43 (s, 3H);  $^{13}\text{C}$  NMR (101 MHz,  $\text{CDCl}_3$ )  $\delta$  187.1, 161.1 (d,  $J = 254.3$  Hz), 146.4, 134.8, 133.5 (d,  $J = 8.5$  Hz), 131.5, 131.2, 130.7 (d,  $J = 2.3$  Hz), 130.59, 130.57, 129.0, 128.4 (d,  $J = 2.6$  Hz), 127.9 (d,  $J = 13.8$  Hz), 127.5, 126.5, 124.3 (d,  $J = 3.6$  Hz), 121.7, 119.7, 116.5 (d,  $J = 21.9$  Hz), 21.8;  $^{19}\text{F}$  NMR (376 MHz,  $\text{CDCl}_3$ )  $\delta$  -112.0; HRMS (ESI)  $m/z$  calcd for  $\text{C}_{24}\text{H}_{17}\text{BrFNO}_3\text{SNa}^+$  ( $\text{M}+\text{Na}$ ) $^+$  519.9990, found 519.9993.

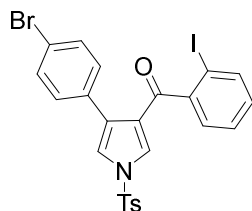

#### (4-(4-bromophenyl)-1-tosyl-1H-pyrrol-3-yl)(2-iodophenyl)methanone (2w)

Compound **2w** was obtained as yellow solid, 51.0 mg, in 42% yield;  $R_f = 0.45$  (petroleum ether : dichloromethane = 1 : 1);  $^1\text{H}$  NMR (400 MHz,  $\text{CDCl}_3$ , TMS)  $\delta$  7.86 (d,  $J = 7.6$  Hz, 1H), 7.80 (d,  $J = 8.4$  Hz, 2H), 7.43-7.41 (m, 2H), 7.39-7.34 (m, 4H), 7.32-7.26 (m, 3H), 7.18 (d,  $J = 2.4$  Hz, 1H), 7.14 (td,  $J_1 = 8.0$  Hz,  $J_2 = 2.0$  Hz, 1H), 2.43 (s, 3H);  $^{13}\text{C}$  NMR (101 MHz,  $\text{CDCl}_3$ )  $\delta$  191.5, 146.5, 144.5, 140.1, 134.8, 131.7, 131.4, 131.3, 130.59, 130.57, 129.5, 129.1, 129.0, 128.0, 127.5, 125.1, 121.8, 120.2, 92.9, 21.9; HRMS (ESI)  $m/z$  calcd for  $\text{C}_{24}\text{H}_{17}\text{BrINO}_3\text{SNa}^+$  ( $\text{M}+\text{Na}$ ) $^+$  627.9049, found 627.9050.

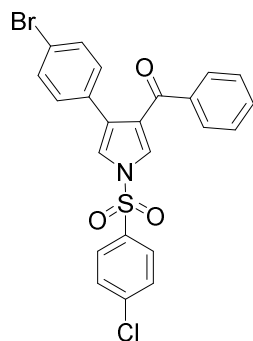

**(4-(4-bromophenyl)-1-((4-chlorophenyl)sulfonyl)-1H-pyrrol-3-yl)(phenyl)methanone (2x)**

Compound **2x** was obtained as yellow solid, 71.3 mg, in 71% yield;  $R_f = 0.42$  (petroleum ether : dichloromethane = 1 : 1);  $^1\text{H NMR}$  (400 MHz,  $\text{CDCl}_3$ , TMS)  $\delta$  7.87 (d,  $J = 8.4$  Hz, 2H), 7.79 (d,  $J = 7.2$  Hz, 2H), 7.57-7.51 (m, 4H), 7.44-7.37 (m, 4H), 7.26 (d,  $J = 2.0$  Hz, 1H), 7.18 (d,  $J = 8.0$  Hz, 2H);  $^{13}\text{C NMR}$  (101 MHz,  $\text{CDCl}_3$ )  $\delta$  190.4, 141.8, 138.1, 136.3, 133.1, 131.5, 131.4, 130.3, 130.2, 129.8, 129.7, 128.8, 128.6, 126.7, 126.1, 121.8, 119.3; HRMS (ESI)  $m/z$  calcd for  $\text{C}_{23}\text{H}_{15}\text{BrClNO}_3\text{SNa}^+$  ( $\text{M}+\text{Na}$ ) $^+$  521.9537, found 521.9540.



## References

1. Y. C. Hsu, S. A. Hsieh and R. S. Liu, *Chem. Eur. J.*, 2019, **25**, 5288.
2. N. Ghosh, S. Nayak and A. K. Sahoo, *Chem. Eur. J.*, 2013, **19**, 9428
3. S. Dutta, B. Prabagar, R. Vanjari, V. Gandon and A. K. Sahoo, *Green Chem.*, 2020, **22**, 1113.
4. J. Febvay, Y. Sanogo, P. Retailleau, M. P. Gogoi, A. K. Sahoo, A. Marinetti and A. Voituriez, *Org. Lett.*, 2019, **21**, 9281.
5. B. H. Zhu, C. M. Wang, H. Y. Su and L. W. Ye, *Chin. J. Chem.*, 2018, **37**, 58.
6. S. Dutta, R. K. Mallick, R. Prasad, V. Gandon and A. K. Sahoo, *Angew. Chem. Int. Ed*, 2019, **58**, 2289.
7. R. Liu, G. N. Winston-McPherson, Z. Y. Yang, X. Zhou, W. Song, I. A. Guzei, X. Xu and W. Tang, *J. Am. Chem. Soc.*, 2013, **135**, 8201.
8. B. Prabagar, S. Nayak, R. Prasad and A. K. Sahoo, *Org. Lett.*, 2016, **18**, 3066.
9. F. L. Hong, Z. S. Wang, D. D. Wei, T. Y. Zhai, G. C. Deng, X. Lu, R. S. Liu and L. W. Ye, *J. Am. Chem. Soc.*, 2019, **141**, 169

# NMR Spectra

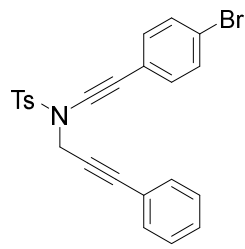

**1b**

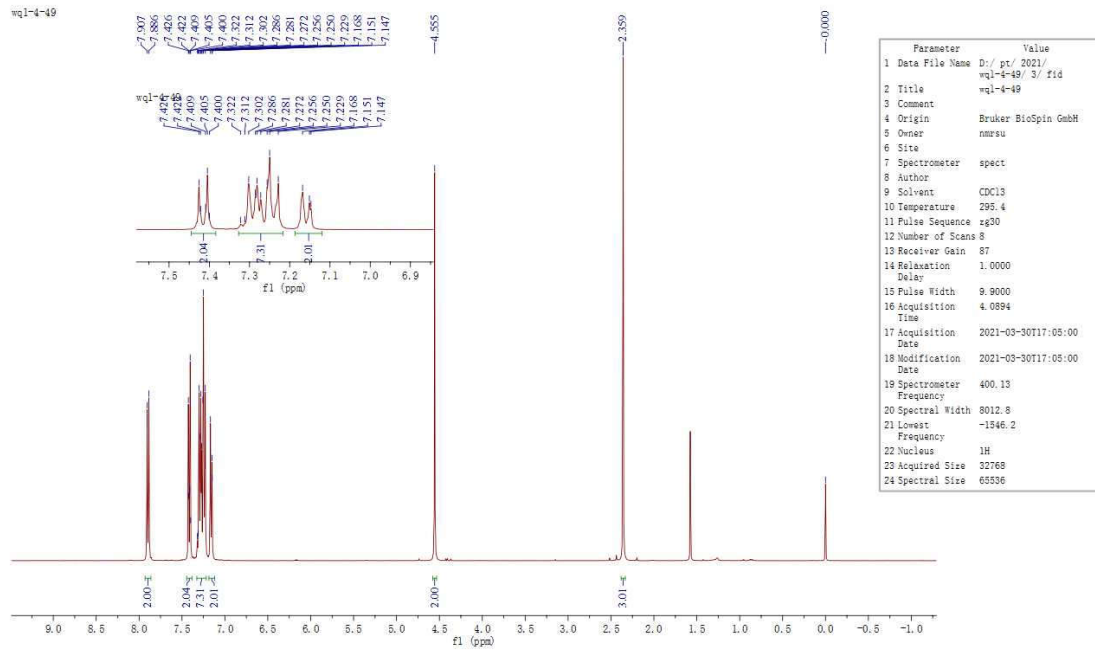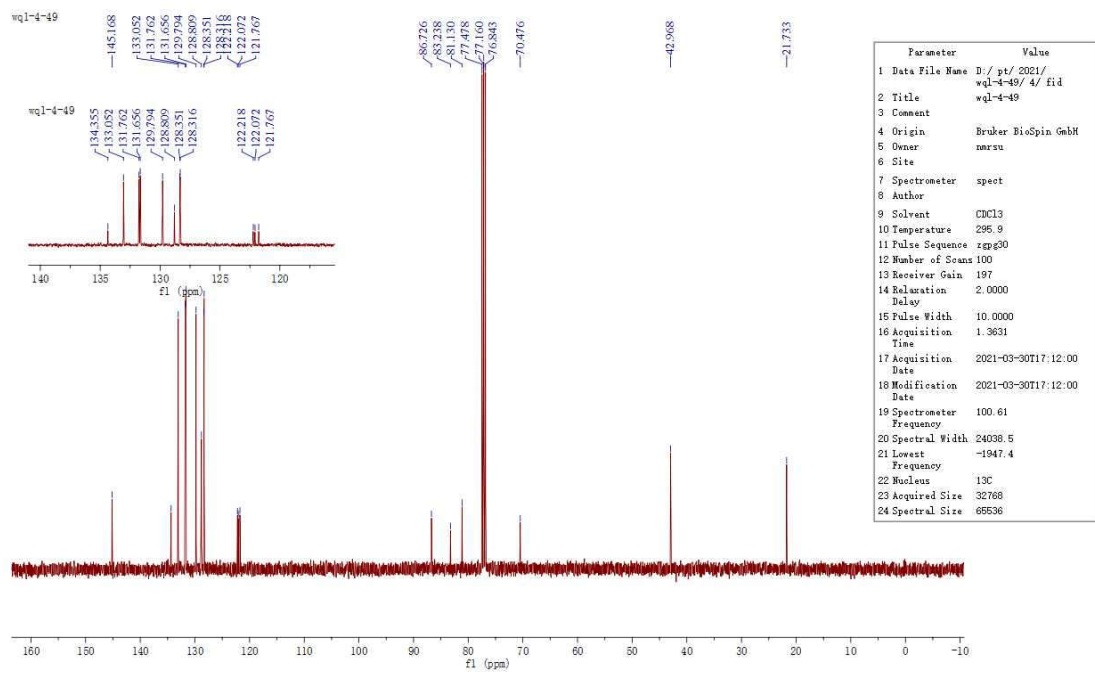

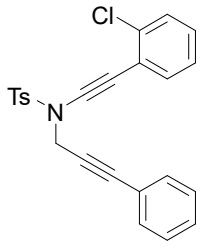

**1g**

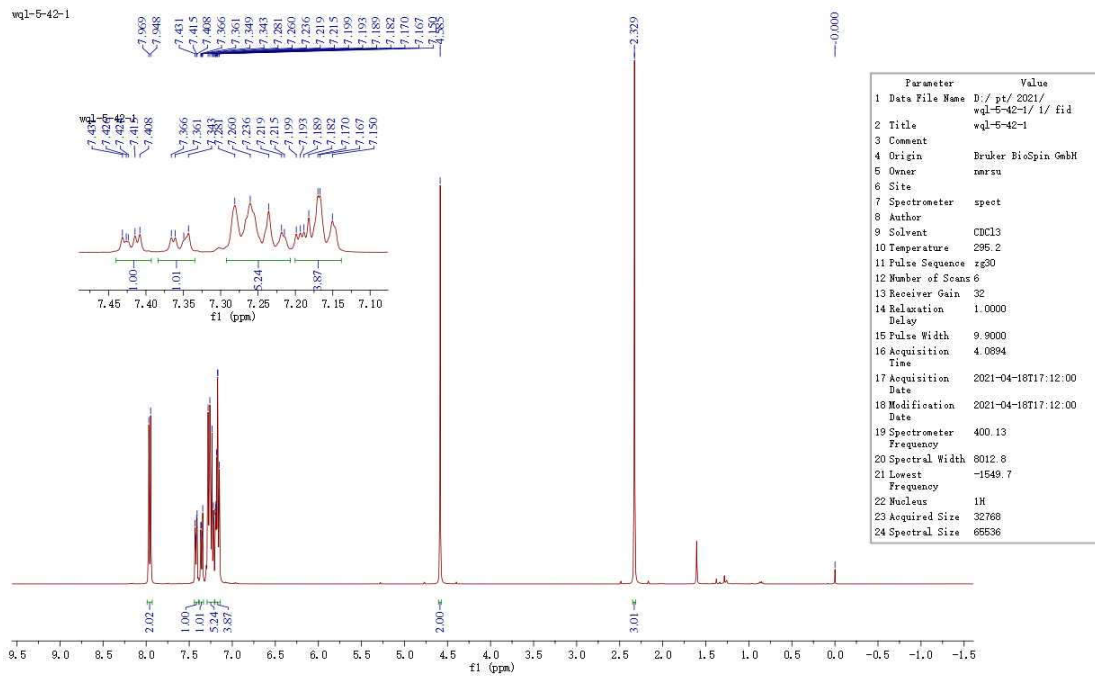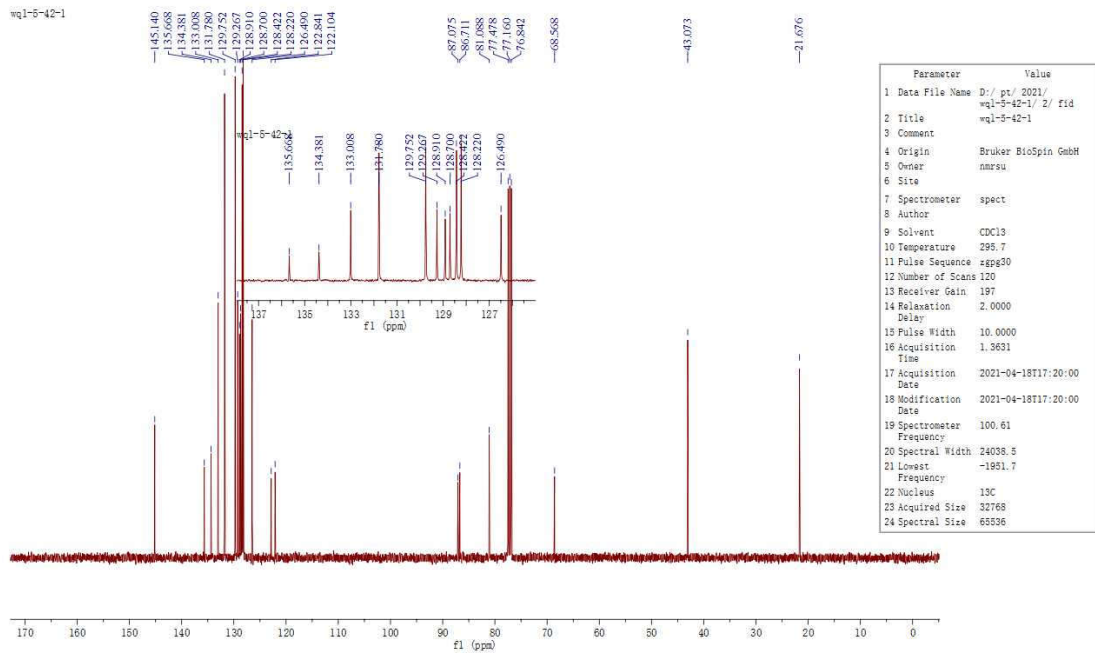

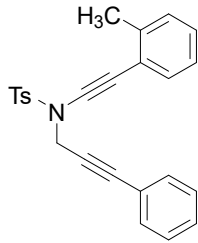

1h

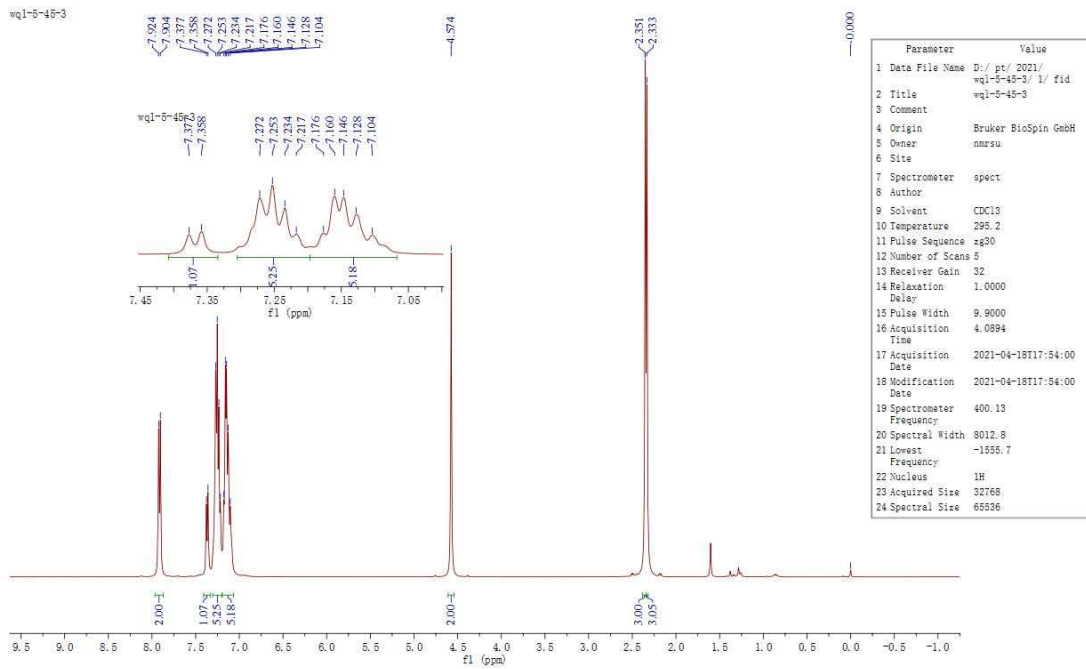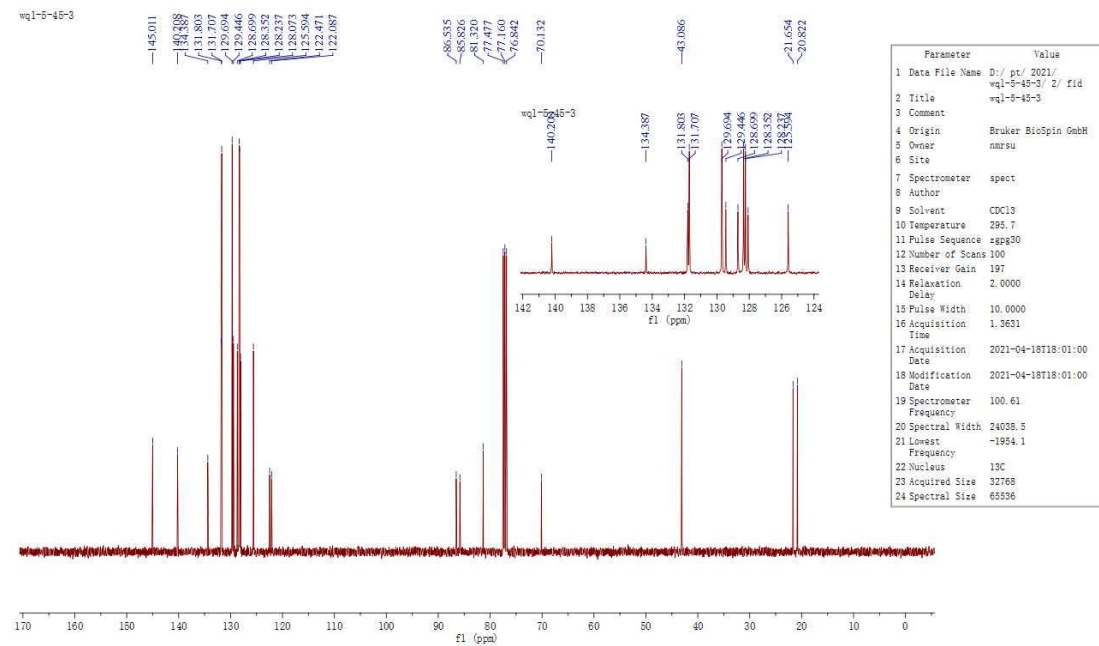





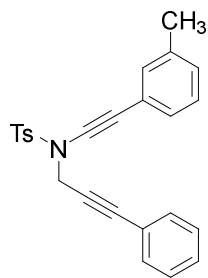

1j

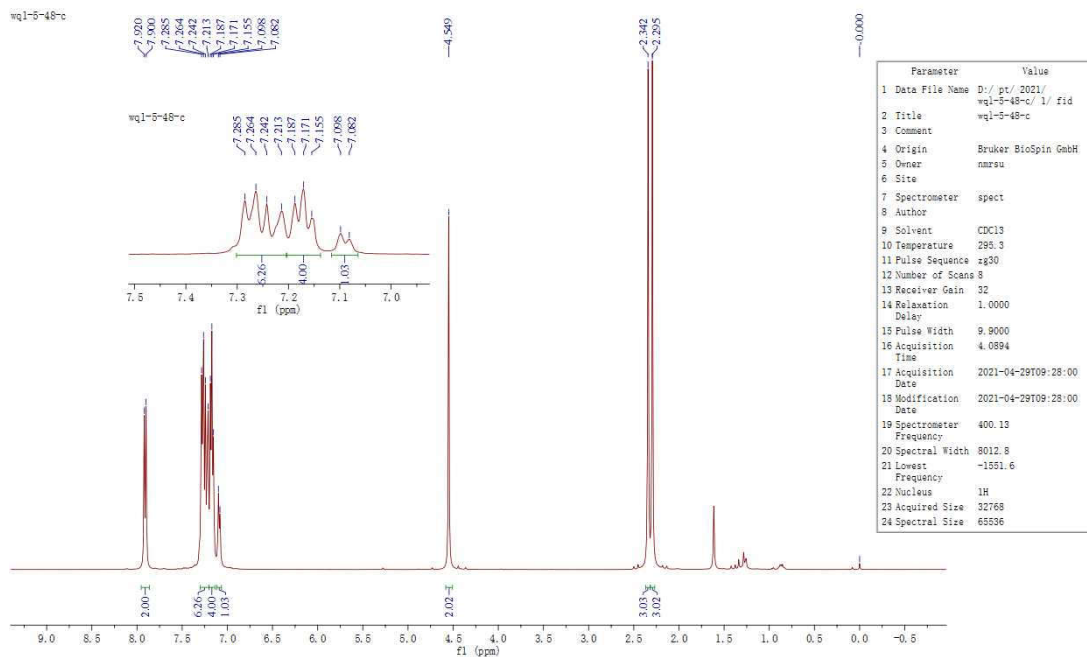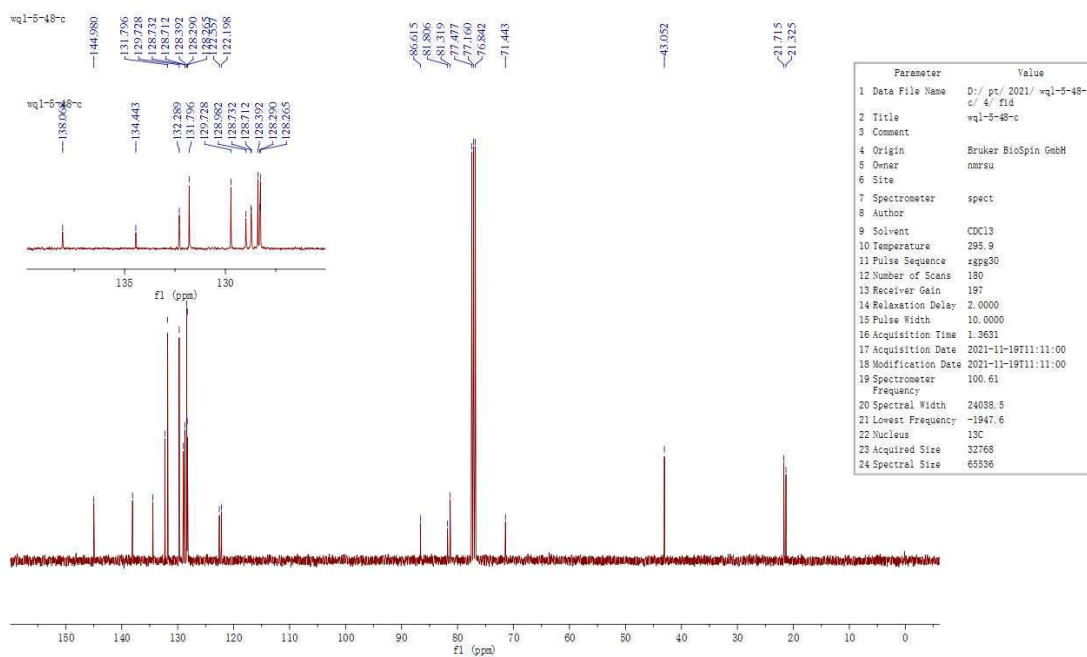

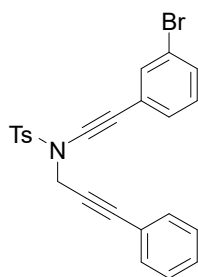

1k

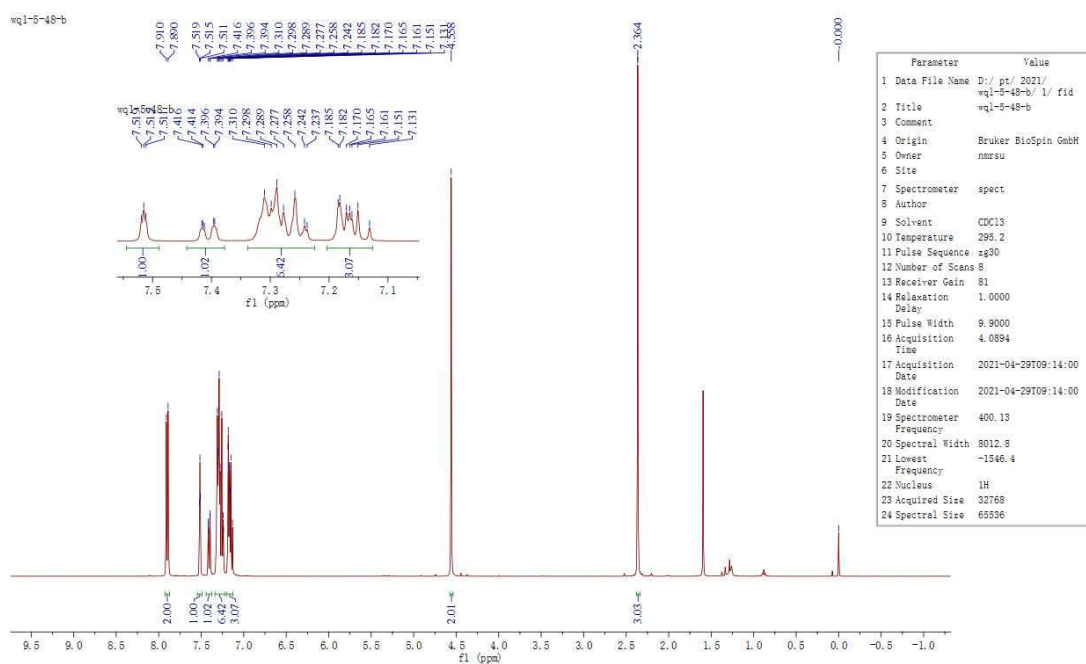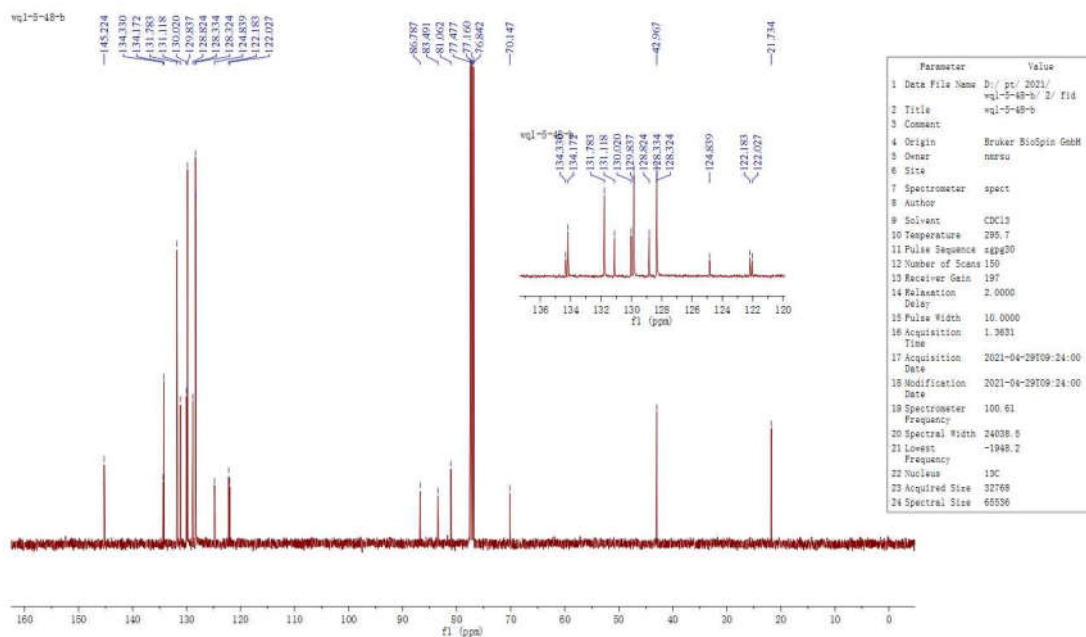

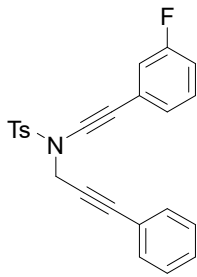

11

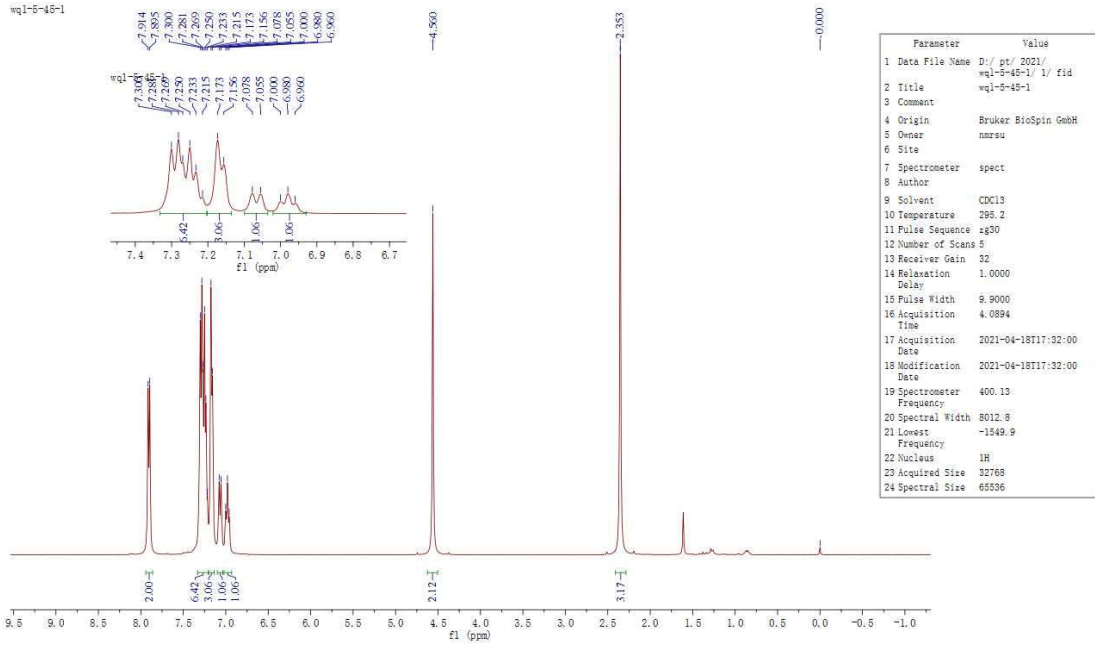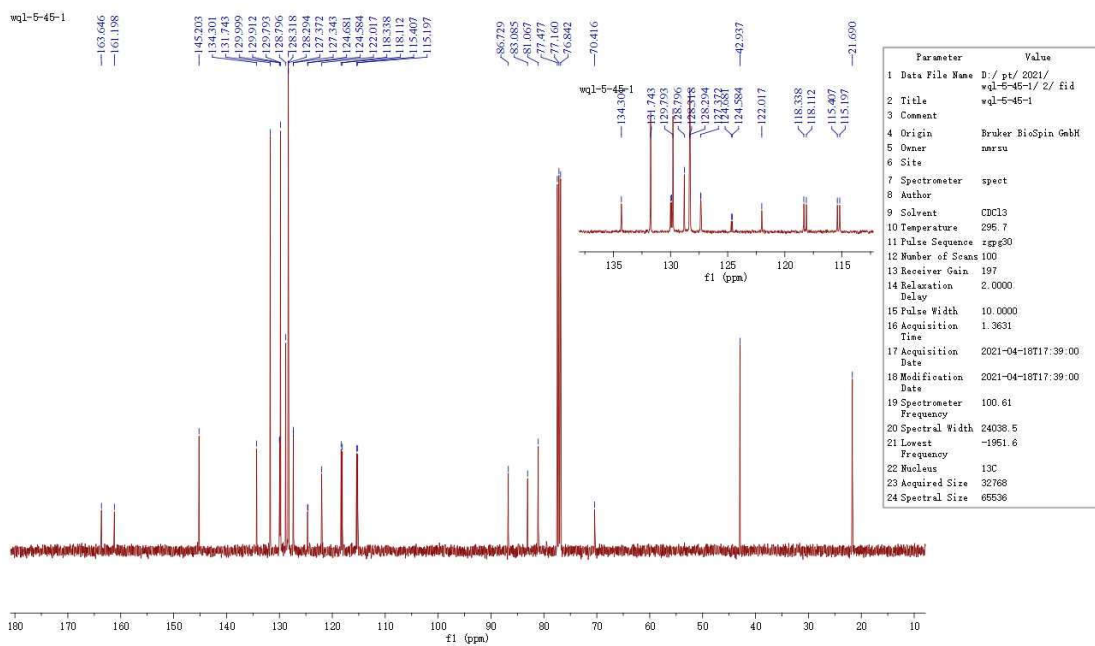

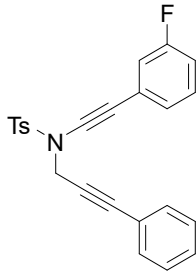

11

wq1-5-45-1

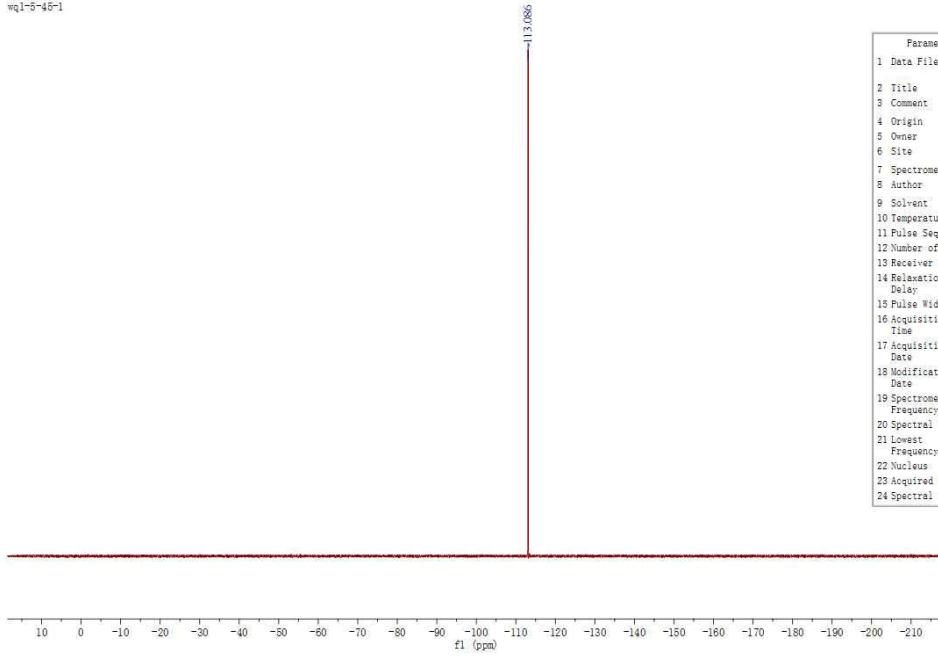

| Parameter                 | Value                        |
|---------------------------|------------------------------|
| 1 Data File Name          | D:/pt/2021/wq1-5-45-1/4/ fid |
| 2 Title                   | wq1-5-45-1                   |
| 3 Comment                 |                              |
| 4 Origin                  | Bruker BioSpin GmbH          |
| 5 Owner                   | mrsu                         |
| 6 Site                    |                              |
| 7 Spectrometer            | spect                        |
| 8 Author                  |                              |
| 9 Solvent                 | CDCl3                        |
| 10 Temperature            | 297.1                        |
| 11 Pulse Sequence         | zgfhgpn.2                    |
| 12 Number of Scans        | 16                           |
| 13 Receiver Gain          | 197                          |
| 14 Relaxation Delay       | 1.0000                       |
| 15 Pulse Width            | 18.0000                      |
| 16 Acquisition Time       | 0.7340                       |
| 17 Acquisition Date       | 2021-07-27T23:26:00          |
| 18 Modification Date      | 2021-07-27T23:26:00          |
| 19 Spectrometer Frequency | 376.50                       |
| 20 Spectral Width         | 89283.7                      |
| 21 Lowest Frequency       | -82292.7                     |
| 22 Nucleus                | 13C                          |
| 23 Acquired Size          | 65596                        |
| 24 Spectral Size          | 131072                       |

wq1-5-45-1-F

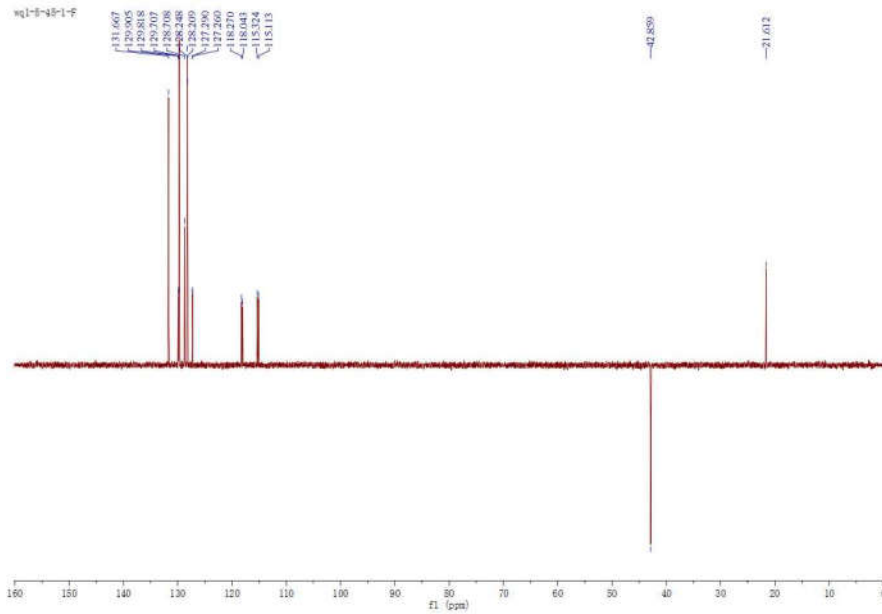

| Parameter                 | Value                          |
|---------------------------|--------------------------------|
| 1 Data File Name          | D:/pt/2021/wq1-5-45-1-F/1/ fid |
| 2 Title                   | wq1-5-45-1-F                   |
| 3 Comment                 |                                |
| 4 Origin                  | Bruker BioSpin GmbH            |
| 5 Owner                   | mrsu                           |
| 6 Site                    |                                |
| 7 Spectrometer            | spect                          |
| 8 Author                  |                                |
| 9 Solvent                 | CDCl3                          |
| 10 Temperature            | 297.3                          |
| 11 Pulse Sequence         | depts133                       |
| 12 Number of Scans        | 99                             |
| 13 Receiver Gain          | 197                            |
| 14 Relaxation Delay       | 2.0000                         |
| 15 Pulse Width            | 10.0000                        |
| 16 Acquisition Time       | 2.0316                         |
| 17 Acquisition Date       | 2021-09-14T16:06:00            |
| 18 Modification Date      | 2021-09-14T16:10:00            |
| 19 Spectrometer Frequency | 100.61                         |
| 20 Spectral Width         | 16129.0                        |
| 21 Lowest Frequency       | -16.0                          |
| 22 Nucleus                | 13C                            |
| 23 Acquired Size          | 32768                          |
| 24 Spectral Size          | 65536                          |

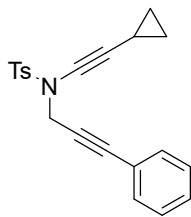

1m

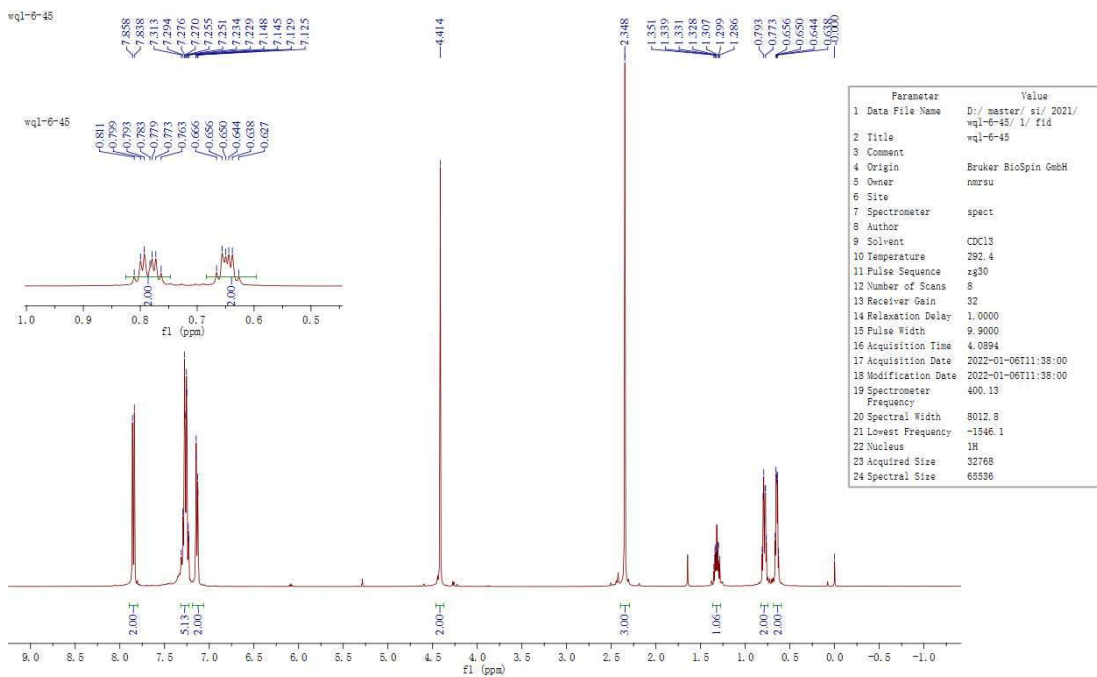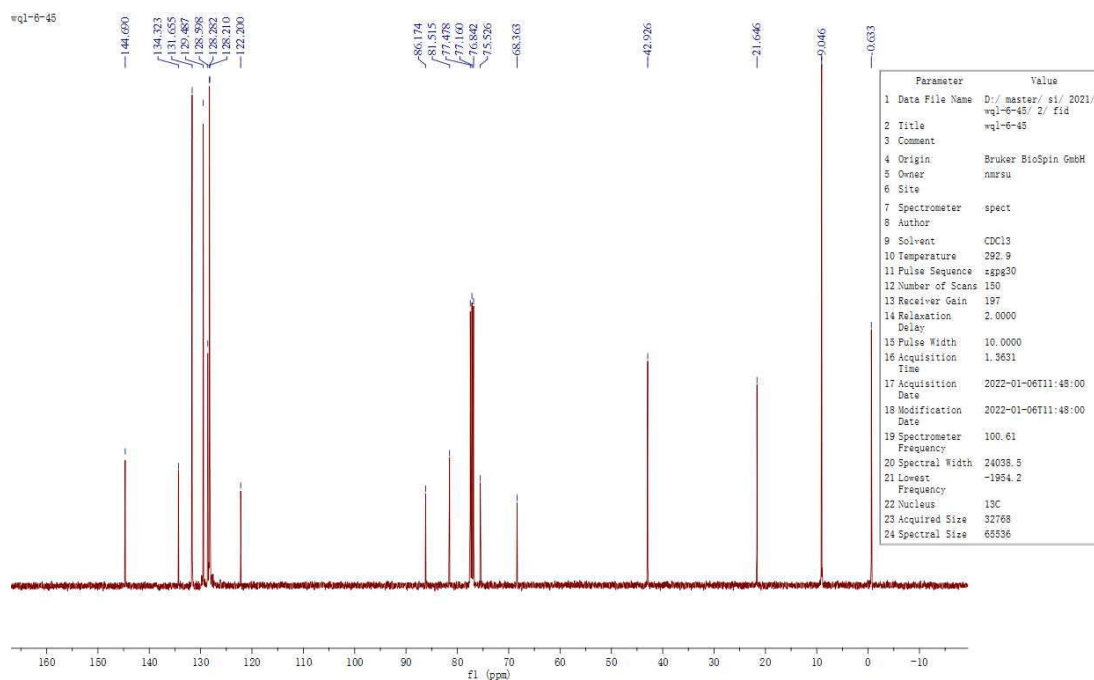

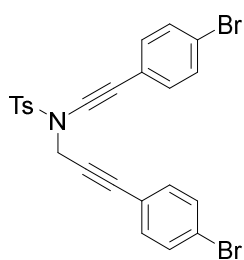

10

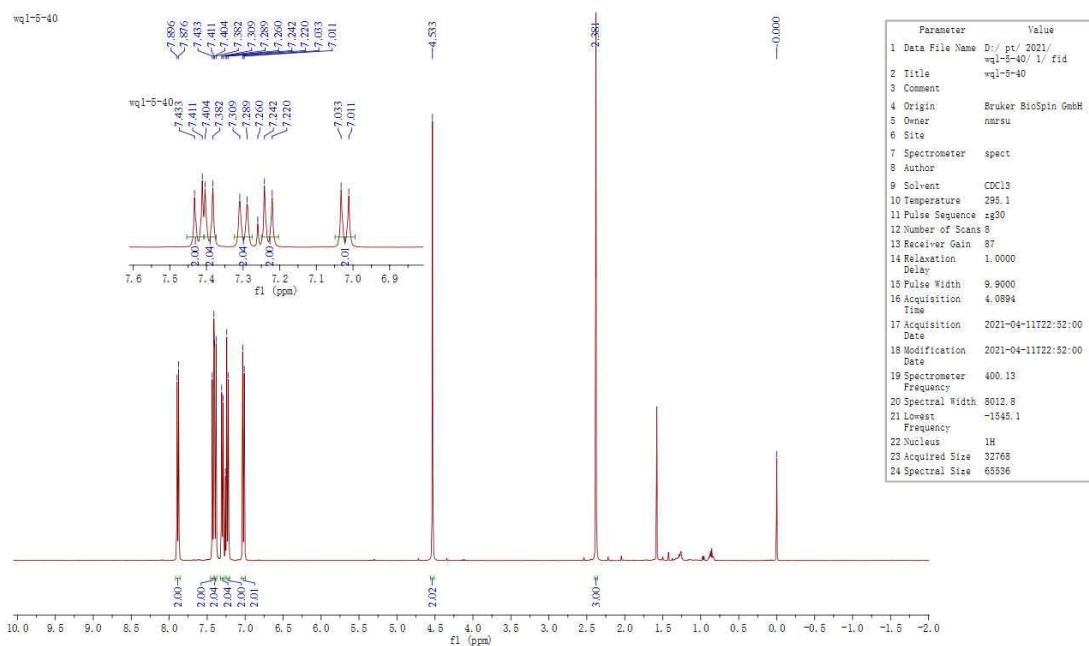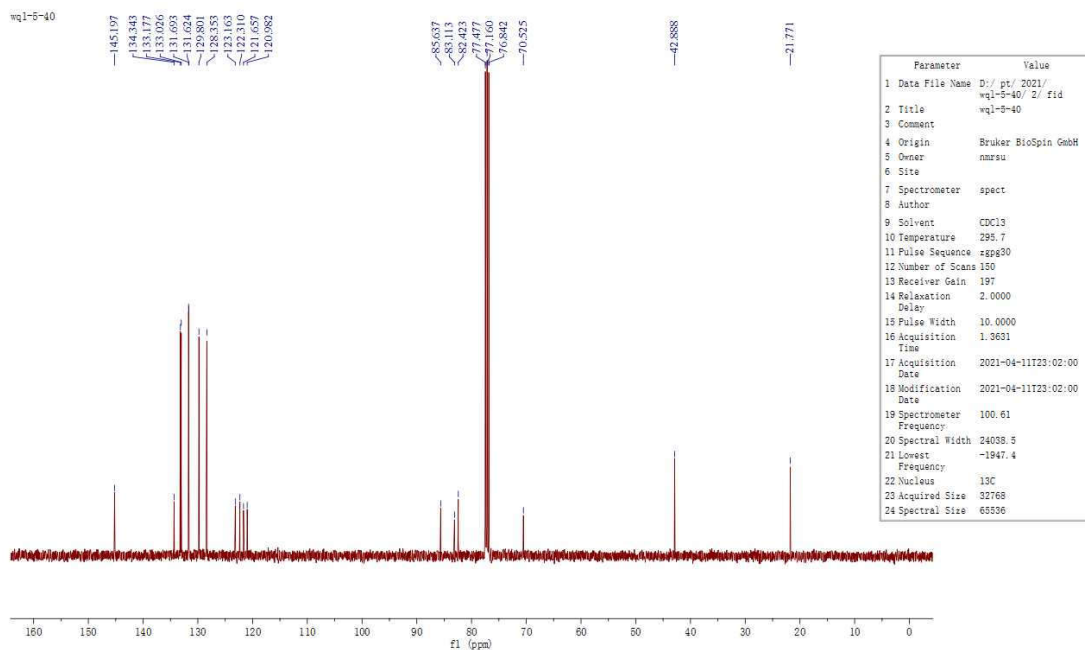

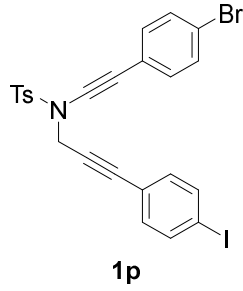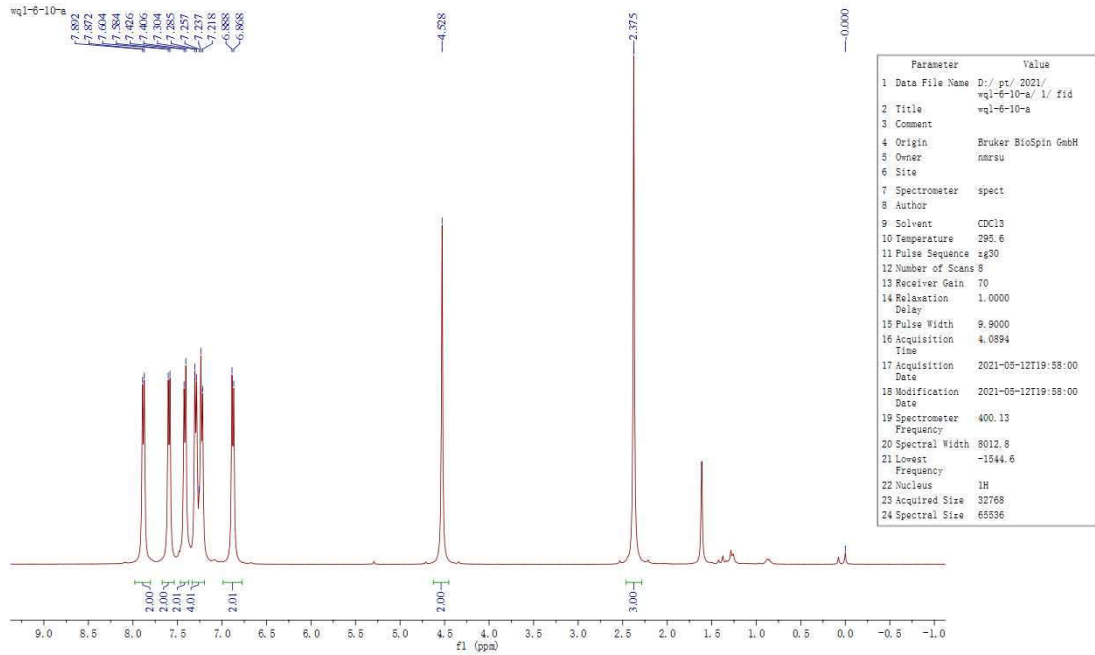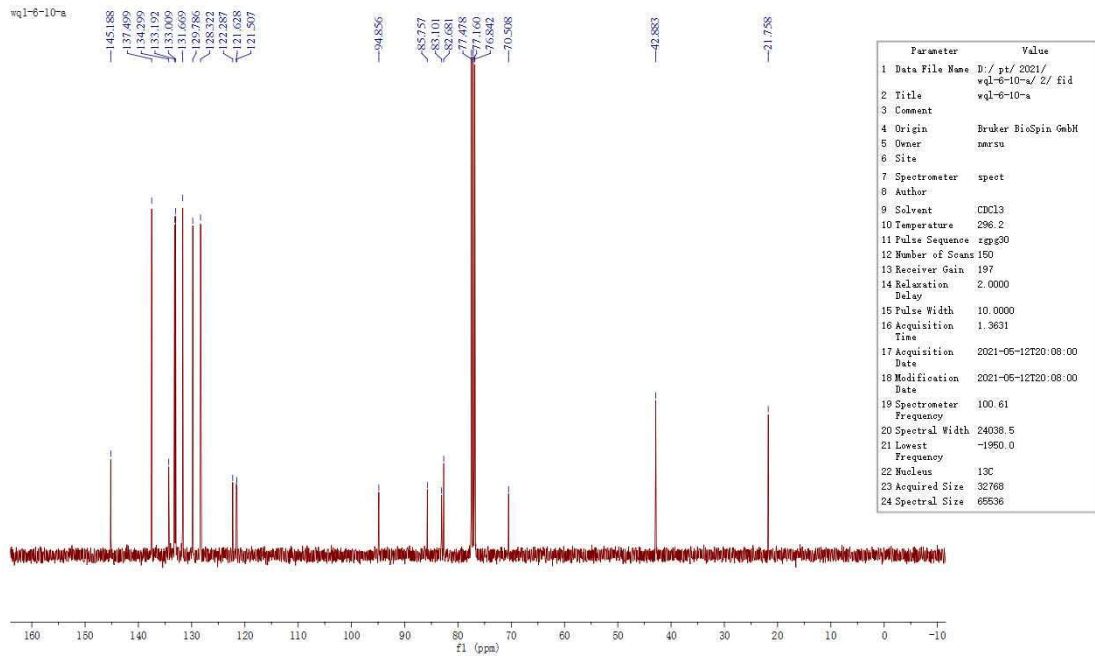



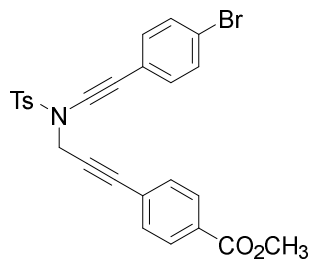

wq1-6-8-b

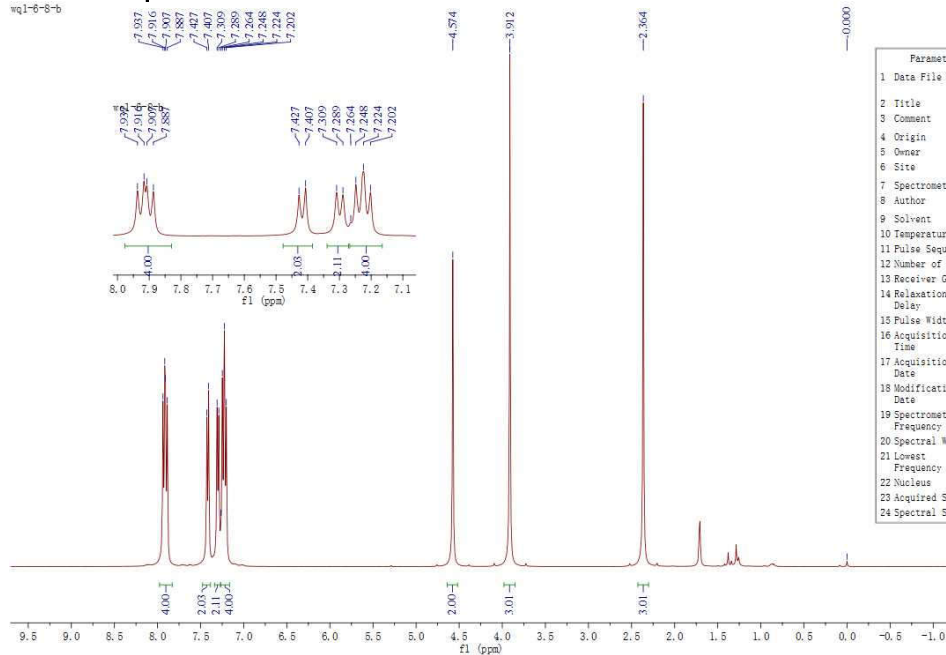

| Parameter                 | Value                       |
|---------------------------|-----------------------------|
| 1 Data File Name          | D:/pr/2021/wq1-6-8-b/1/ fid |
| 2 Title                   | wq1-6-8-b                   |
| 3 Comment                 |                             |
| 4 Origin                  | Bruker BioSpin GmbH         |
| 5 Owner                   | mrsu                        |
| 6 Site                    |                             |
| 7 Spectrometer            | spect                       |
| 8 Author                  |                             |
| 9 Solvent                 | CDCl3                       |
| 10 Temperature            | 296.0                       |
| 11 Pulse Sequence         | zg30                        |
| 12 Number of Scans        | 8                           |
| 13 Receiver Gain          | 32                          |
| 14 Relaxation Delay       | 1.0000                      |
| 15 Pulse Width            | 9.9000                      |
| 16 Acquisition Time       | 4.0894                      |
| 17 Acquisition Date       | 2021-05-12T10:45:00         |
| 18 Modification Date      | 2021-05-12T10:45:00         |
| 19 Spectrometer Frequency | 400.13                      |
| 20 Spectral Width         | 8012.8                      |
| 21 Lowest Frequency       | -1942.4                     |
| 22 Nucleus                | 1H                          |
| 23 Acquired Size          | 32768                       |
| 24 Spectral Size          | 65936                       |

wq1-6-8-b

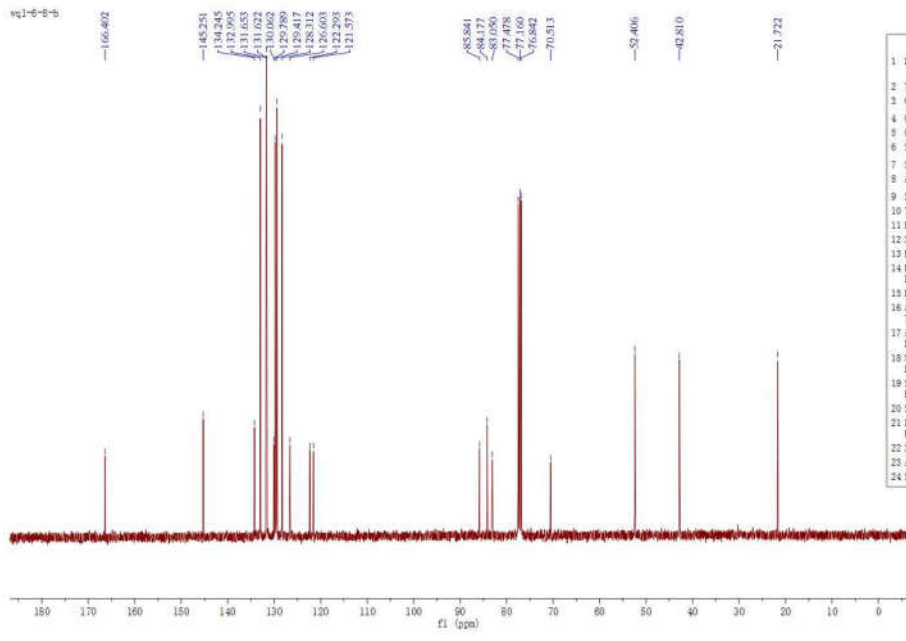

| Parameter                 | Value                       |
|---------------------------|-----------------------------|
| 1 Data File Name          | D:/pr/2021/wq1-6-8-b/2/ fid |
| 2 Title                   | wq1-6-8-b                   |
| 3 Comment                 |                             |
| 4 Origin                  | Bruker BioSpin GmbH         |
| 5 Owner                   | mrsu                        |
| 6 Site                    |                             |
| 7 Spectrometer            | spect                       |
| 8 Author                  |                             |
| 9 Solvent                 | CDCl3                       |
| 10 Temperature            | 296.3                       |
| 11 Pulse Sequence         | zgpg30                      |
| 12 Number of Scans        | 150                         |
| 13 Receiver Gain          | 197                         |
| 14 Relaxation Delay       | 2.0000                      |
| 15 Pulse Width            | 10.0000                     |
| 16 Acquisition Time       | 1.9631                      |
| 17 Acquisition Date       | 2021-05-12T10:55:00         |
| 18 Modification Date      | 2021-05-12T10:55:00         |
| 19 Spectrometer Frequency | 100.61                      |
| 20 Spectral Width         | 24038.3                     |
| 21 Lowest Frequency       | -1951.9                     |
| 22 Nucleus                | 13C                         |
| 23 Acquired Size          | 32768                       |
| 24 Spectral Size          | 65936                       |

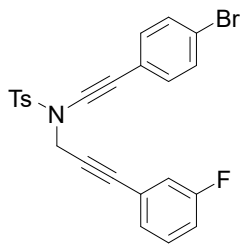

1r

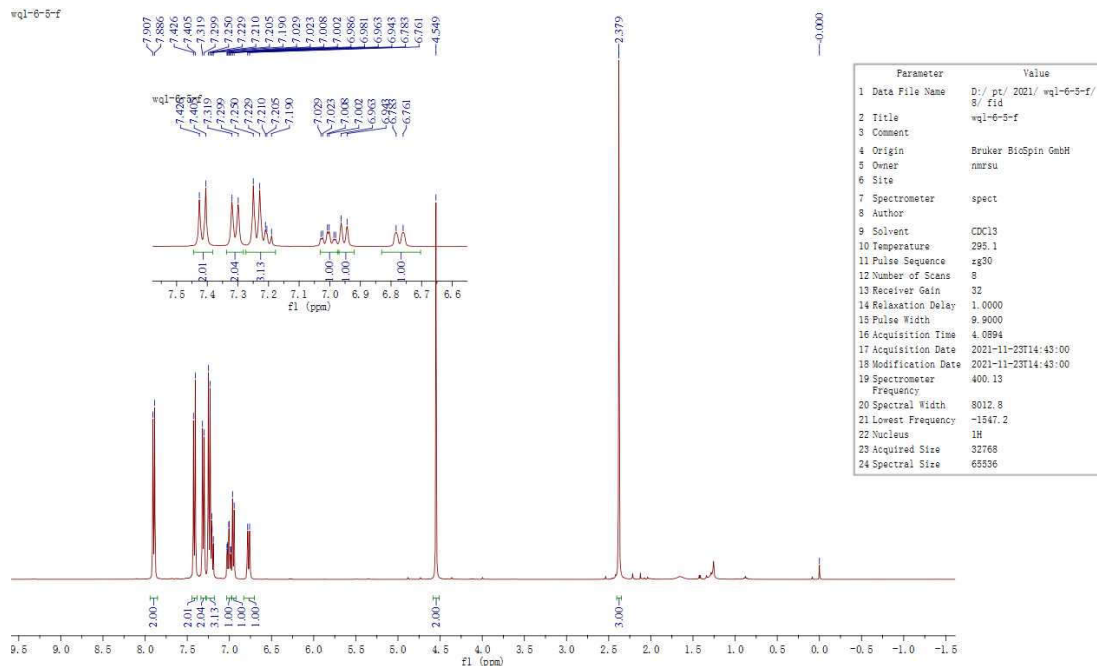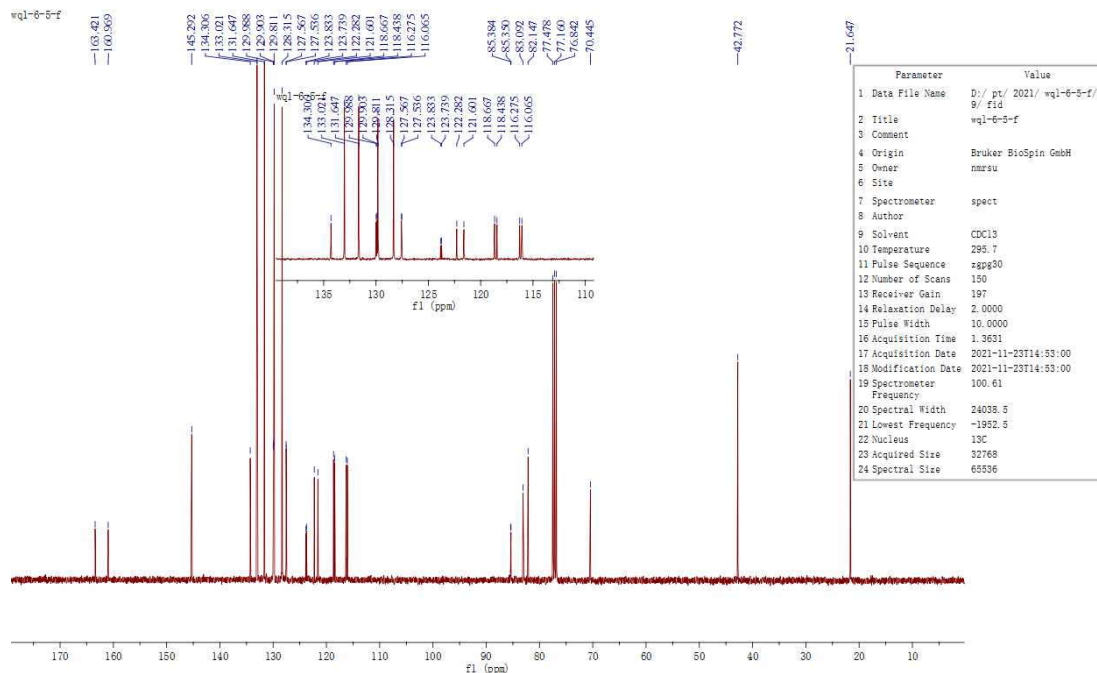

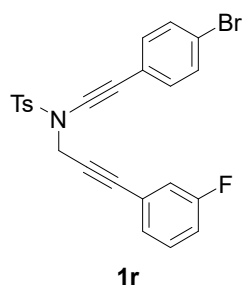

wq1-6-5-f

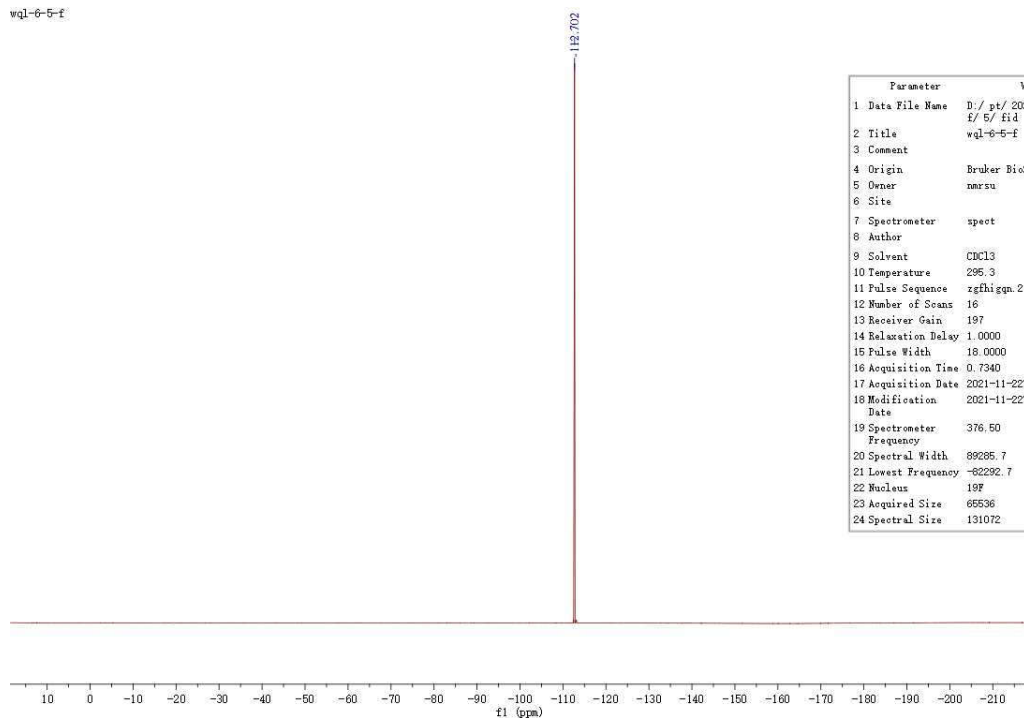

| Parameter                 | Value                           |
|---------------------------|---------------------------------|
| 1 Data File Name          | D:/_pt/ 2021/ wq1-6-5-f/ 5/ fid |
| 2 Title                   | wq1-6-5-f                       |
| 3 Comment                 |                                 |
| 4 Origin                  | Bruker BioSpin GmbH             |
| 5 Owner                   | nmsru                           |
| 6 Site                    |                                 |
| 7 Spectrometer            | spect                           |
| 8 Author                  |                                 |
| 9 Solvent                 | CDCl3                           |
| 10 Temperature            | 296.3                           |
| 11 Pulse Sequence         | zgfhggm.2                       |
| 12 Number of Scans        | 16                              |
| 13 Receiver Gain          | 197                             |
| 14 Relaxation Delay       | 1.0000                          |
| 15 Pulse Width            | 18.0000                         |
| 16 Acquisition Time       | 0.7340                          |
| 17 Acquisition Date       | 2021-11-22T10:54:00             |
| 18 Modification Date      | 2021-11-22T10:54:00             |
| 19 Spectrometer Frequency | 376.50                          |
| 20 Spectral Width         | 89285.7                         |
| 21 Lowest Frequency       | -82292.7                        |
| 22 Nucleus                | 13C                             |
| 23 Acquired Size          | 65536                           |
| 24 Spectral Size          | 131072                          |

wq1-6-5-f

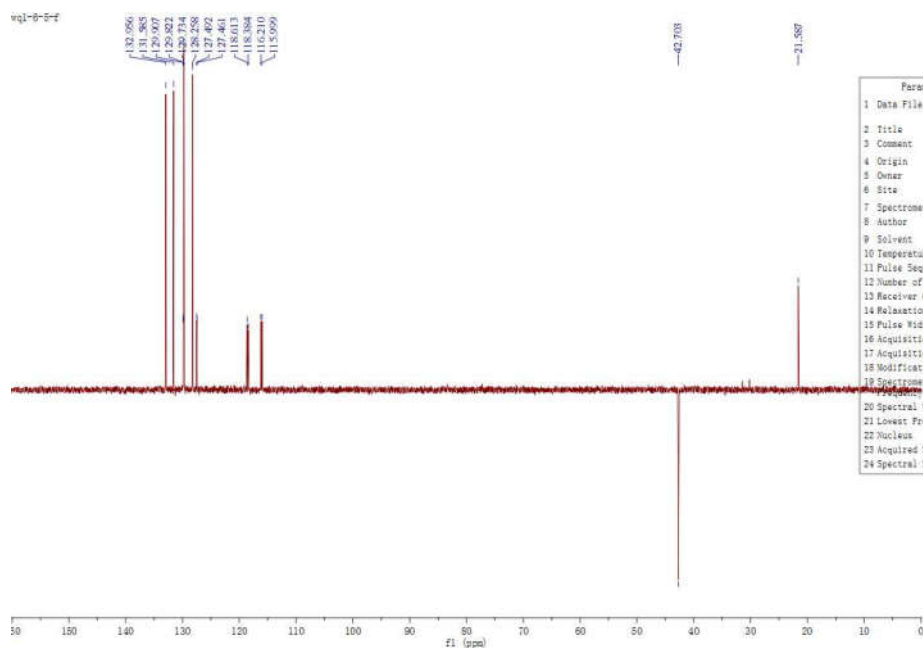

| Parameter                 | Value                           |
|---------------------------|---------------------------------|
| 1 Data File Name          | D:/_pt/ 2021/ wq1-6-5-f/ 3/ fid |
| 2 Title                   | wq1-6-5-f                       |
| 3 Comment                 |                                 |
| 4 Origin                  | Bruker BioSpin GmbH             |
| 5 Owner                   | nmsru                           |
| 6 Site                    |                                 |
| 7 Spectrometer            | spect                           |
| 8 Author                  |                                 |
| 9 Solvent                 | CDCl3                           |
| 10 Temperature            | 295.7                           |
| 11 Pulse Sequence         | deptspl35                       |
| 12 Number of Scans        | 138                             |
| 13 Receiver Gain          | 197                             |
| 14 Relaxation Delay       | 2.0000                          |
| 15 Pulse Width            | 18.0000                         |
| 16 Acquisition Time       | 2.0316                          |
| 17 Acquisition Date       | 2021-11-21T16:34:00             |
| 18 Modification Date      | 2021-11-21T16:34:00             |
| 19 Spectrometer Frequency | 100.61                          |
| 20 Spectral Width         | 16129.0                         |
| 21 Lowest Frequency       | -16.0                           |
| 22 Nucleus                | 13C                             |
| 23 Acquired Size          | 32768                           |
| 24 Spectral Size          | 65536                           |

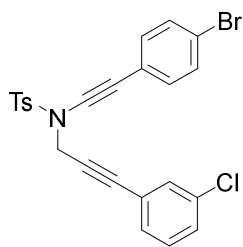

**1s**

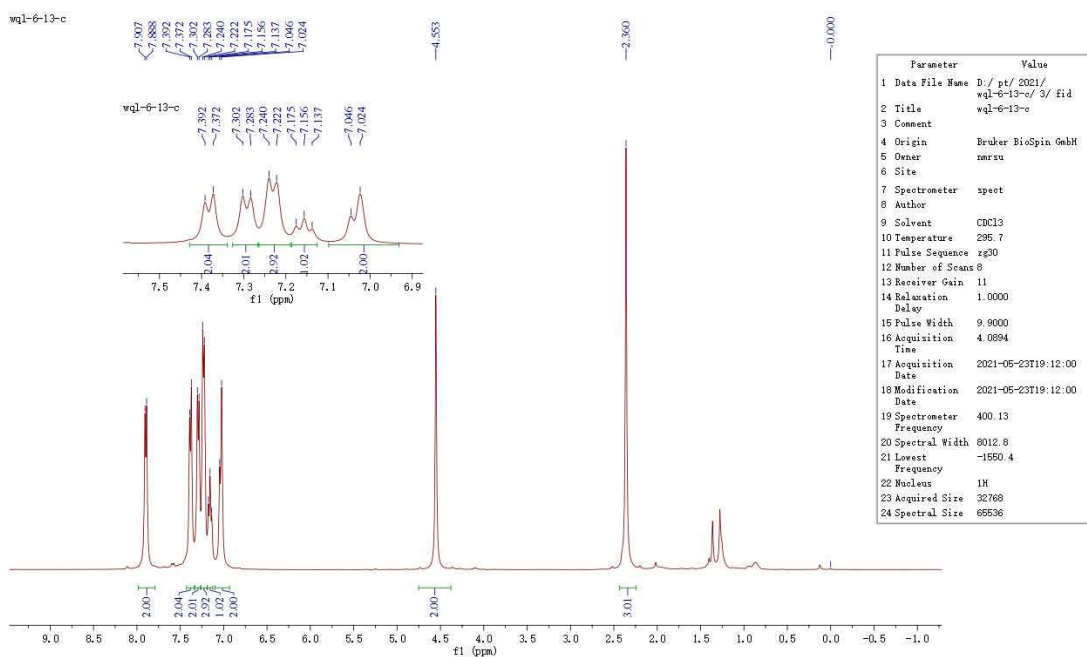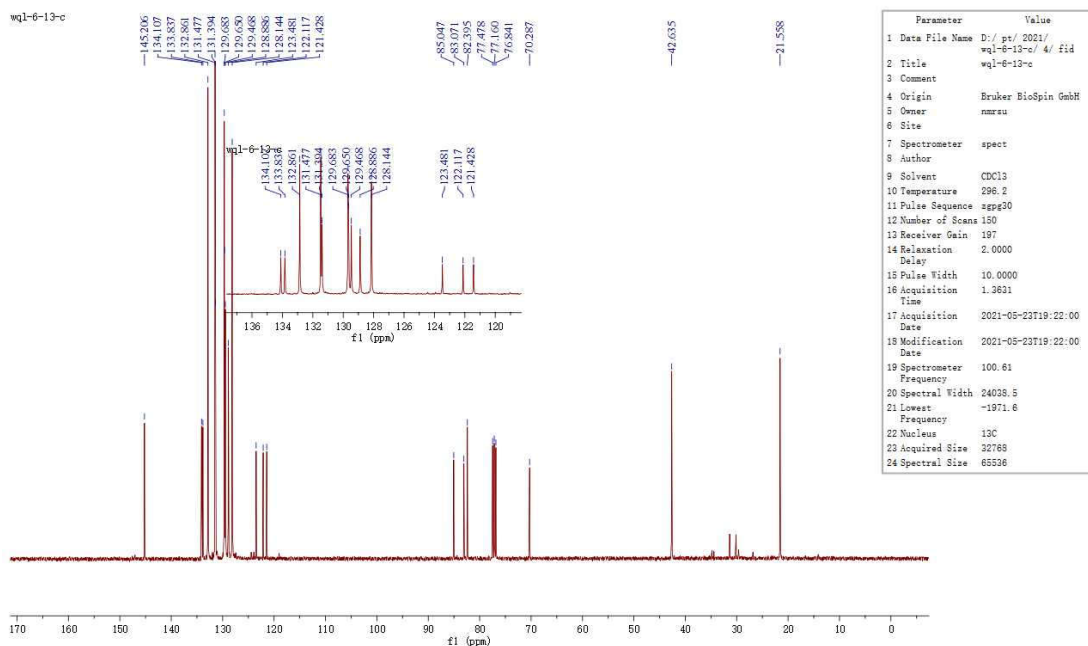



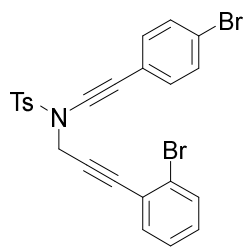

1u

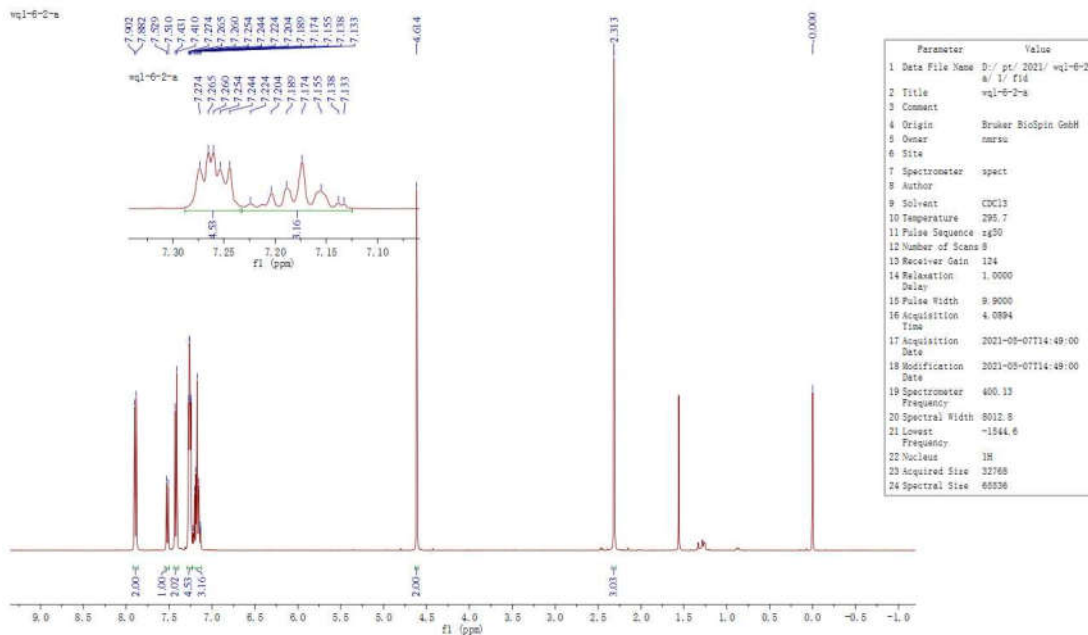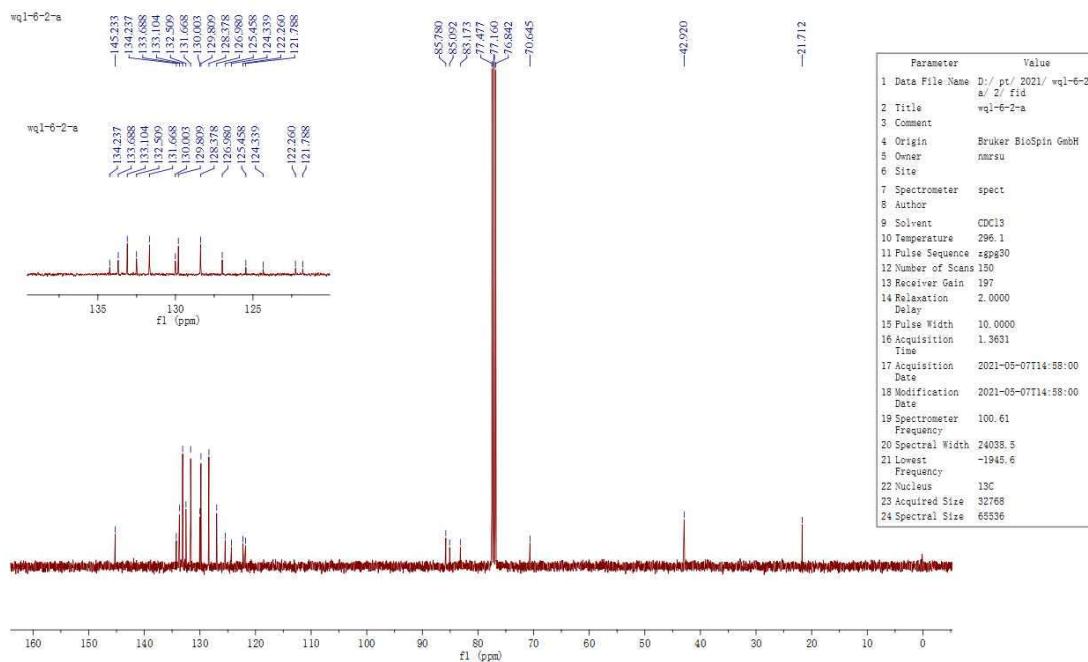

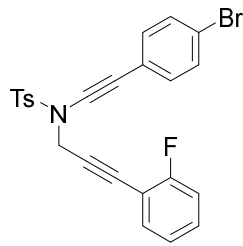

1v

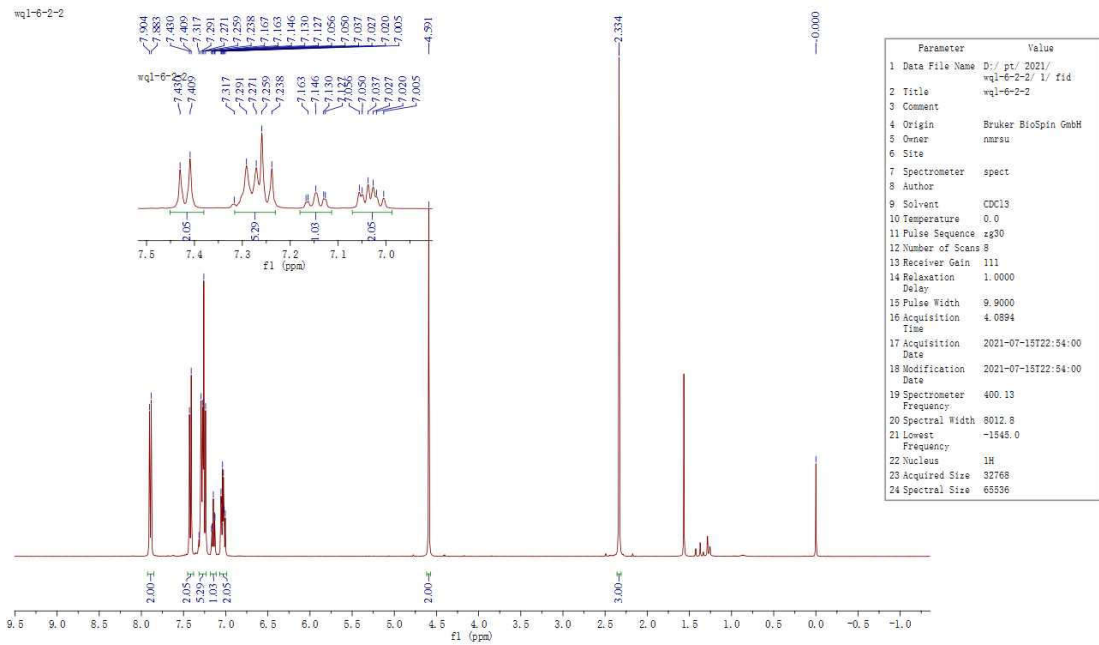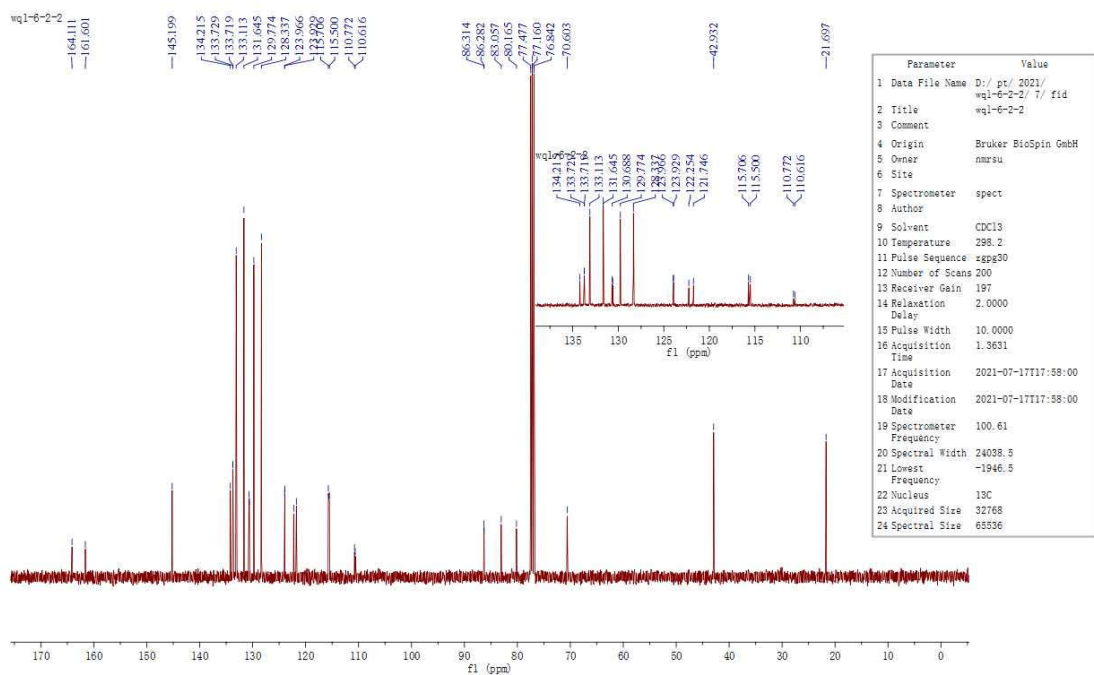

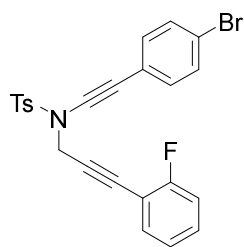

1v

wq1-6-2-2-C

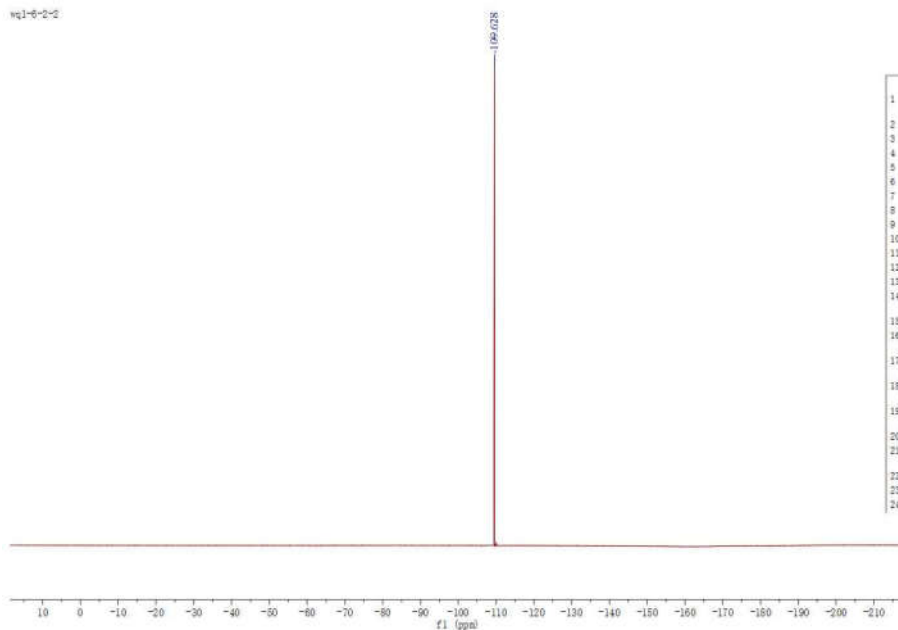

| Parameter                 | Value                       |
|---------------------------|-----------------------------|
| 1 Data File Name          | D:/pr/2021/wq1-6-2-2/6/ f1d |
| 2 Title                   | wq1-6-2-2                   |
| 3 Comment                 |                             |
| 4 Origin                  | Bruker BioSpin GmbH         |
| 5 Owner                   | nmrsu                       |
| 6 Site                    |                             |
| 7 Spectrometer            | spect                       |
| 8 Author                  |                             |
| 9 Solvent                 | CDCl3                       |
| 10 Temperature            | 297.7                       |
| 11 Pulse Sequence         | zgpg30qz                    |
| 12 Number of Scans        | 16                          |
| 13 Receiver Gain          | 197                         |
| 14 Relaxation Delay       | 3.0000                      |
| 15 Pulse Width            | 18.0000                     |
| 16 Acquisition Time       | 0.7340                      |
| 17 Acquisition Date       | 2021-07-17T11:45:00         |
| 18 Modification Date      | 2021-07-17T11:45:00         |
| 19 Spectrometer Frequency | 376.50                      |
| 20 Spectral Width         | 89285.7                     |
| 21 Lowest Frequency       | -82282.7                    |
| 22 Nucleus                | 13C                         |
| 23 Acquired Size          | 65536                       |
| 24 Spectral Size          | 131072                      |

wq1-6-2-2-F

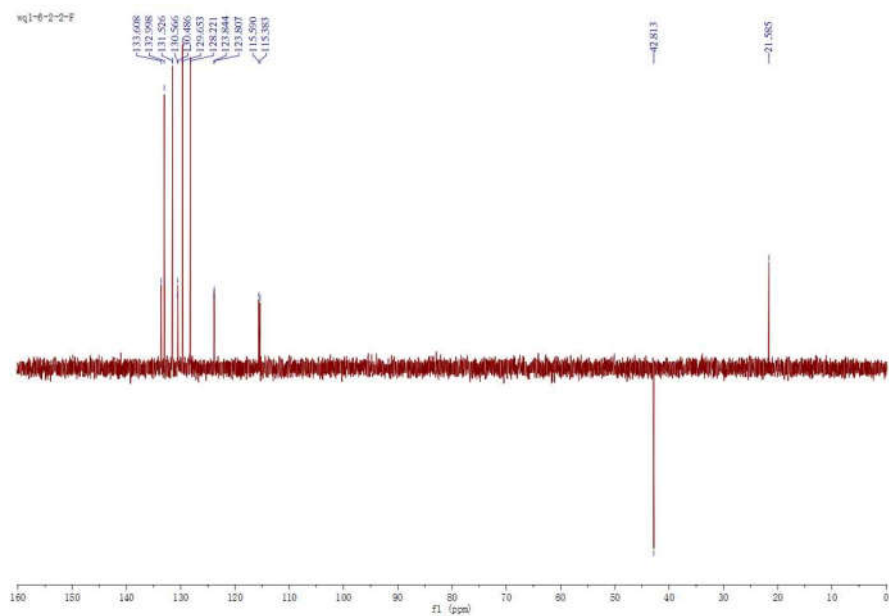

| Parameter                 | Value                         |
|---------------------------|-------------------------------|
| 1 Data File Name          | D:/pr/2021/wq1-6-2-2-F/1/ f1d |
| 2 Title                   | wq1-6-2-2-F                   |
| 3 Comment                 |                               |
| 4 Origin                  | Bruker BioSpin GmbH           |
| 5 Owner                   | nmrsu                         |
| 6 Site                    |                               |
| 7 Spectrometer            | spect                         |
| 8 Author                  |                               |
| 9 Solvent                 | CDCl3                         |
| 10 Temperature            | 296.4                         |
| 11 Pulse Sequence         | deptsq135                     |
| 12 Number of Scans        | 125                           |
| 13 Receiver Gain          | 197                           |
| 14 Relaxation Delay       | 2.0000                        |
| 15 Pulse Width            | 10.0000                       |
| 16 Acquisition Time       | 2.0516                        |
| 17 Acquisition Date       | 2021-08-12T15:47:00           |
| 18 Modification Date      | 2021-08-12T15:56:00           |
| 19 Spectrometer Frequency | 100.61                        |
| 20 Spectral Width         | 16129.0                       |
| 21 Lowest Frequency       | -16.0                         |
| 22 Nucleus                | 13C                           |
| 23 Acquired Size          | 32768                         |
| 24 Spectral Size          | 65536                         |



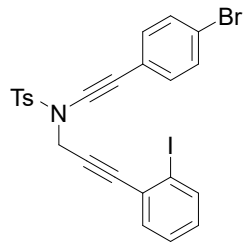

1w

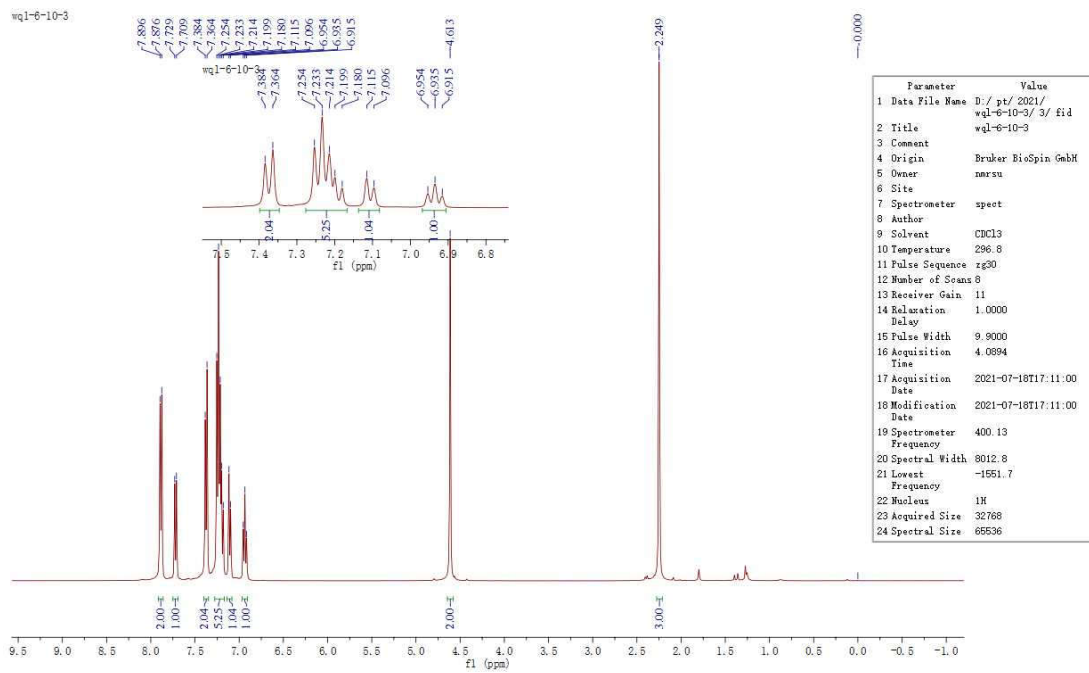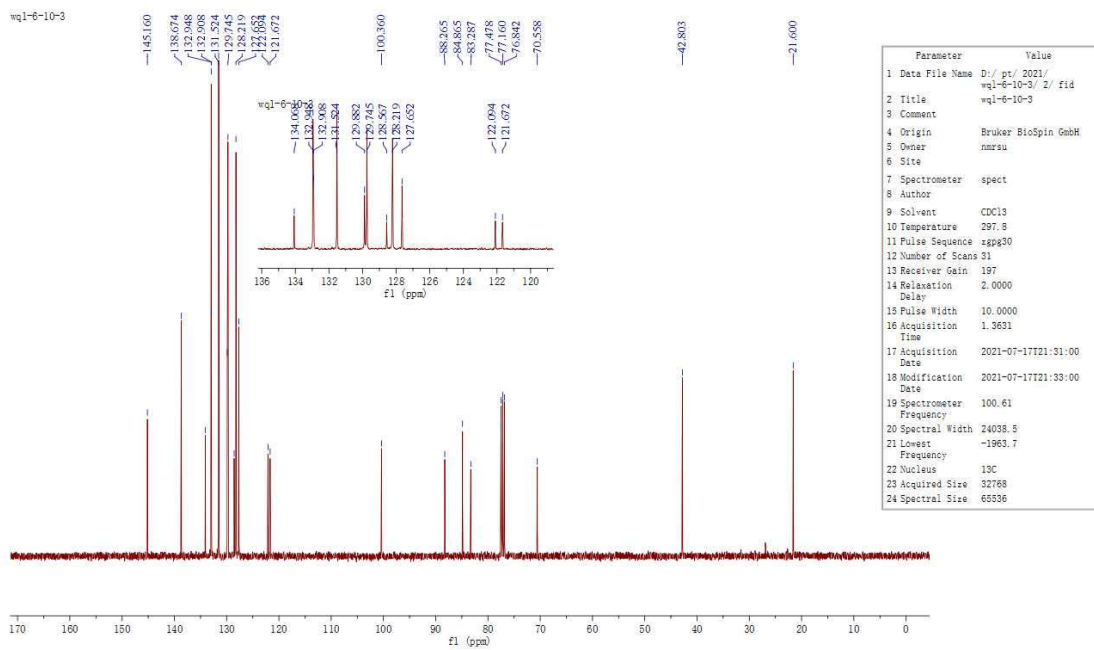



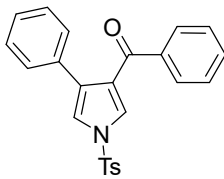

**2a**

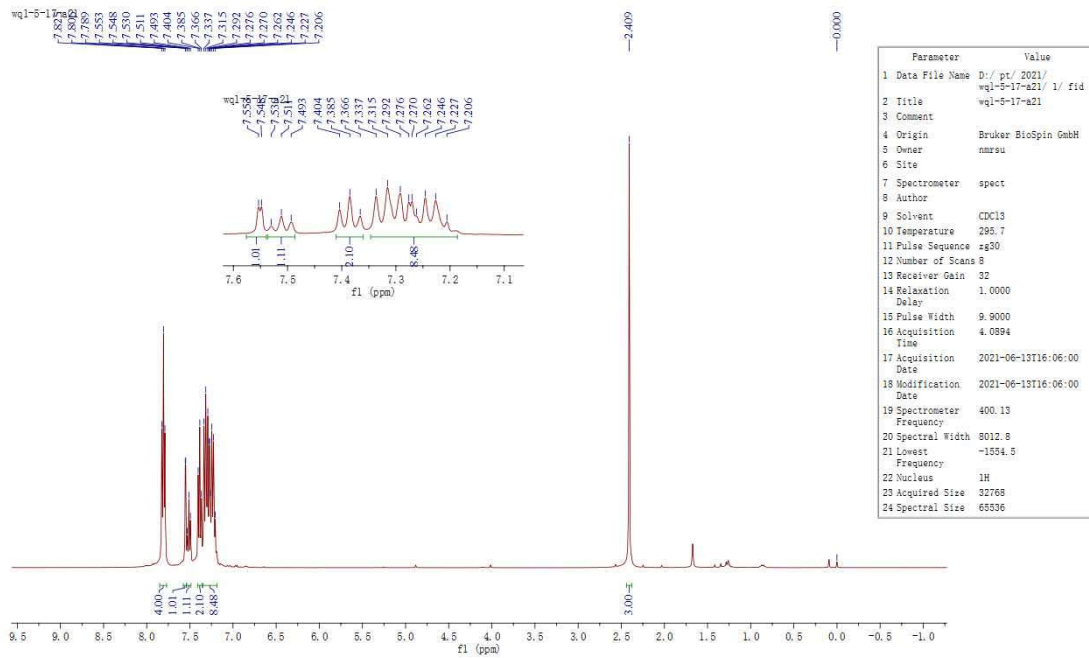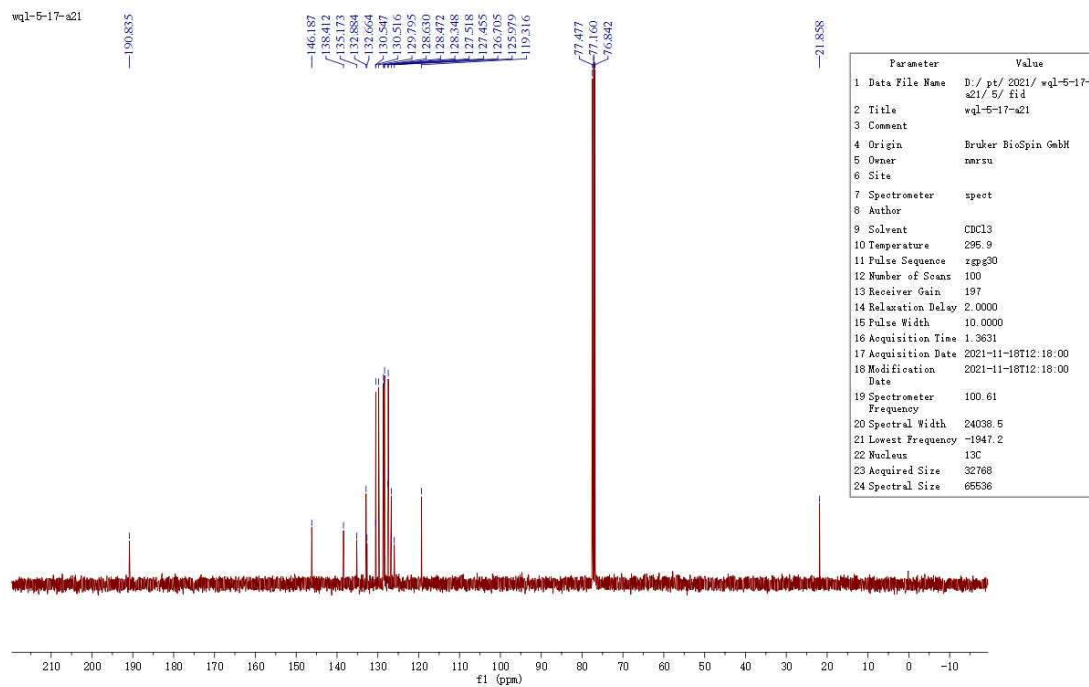

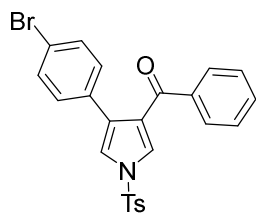

2b

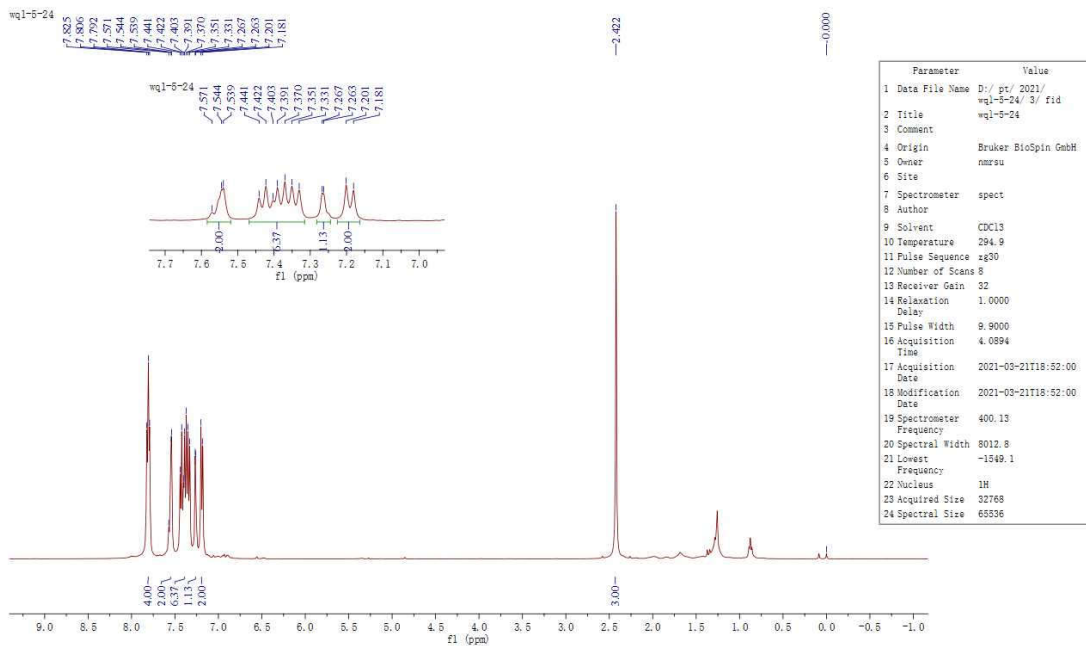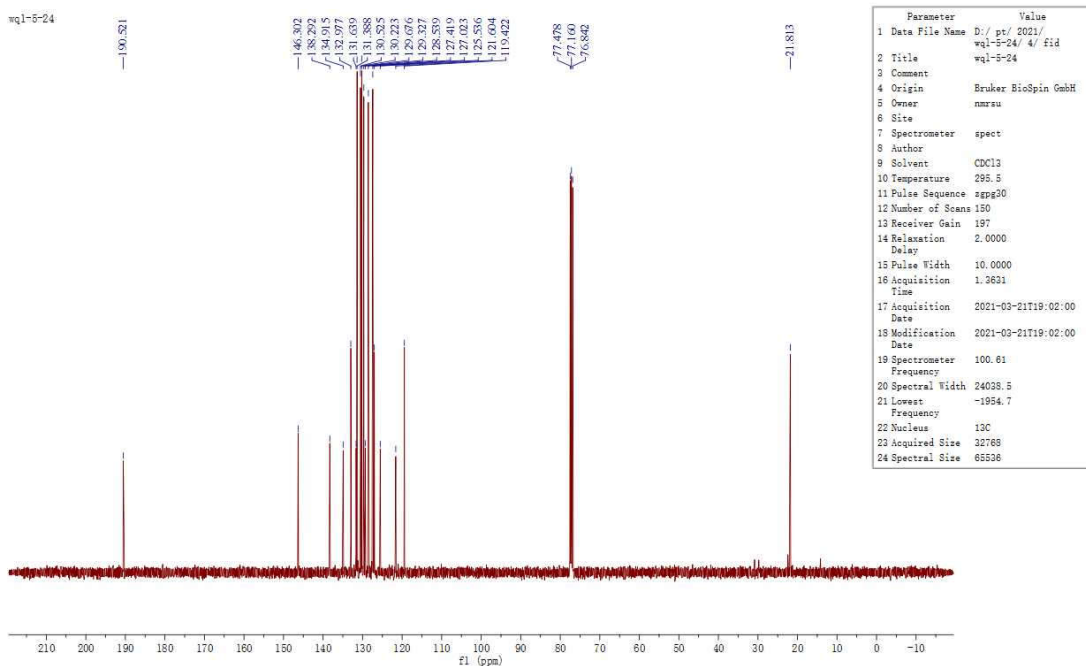

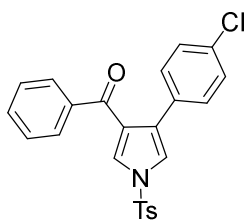

2c

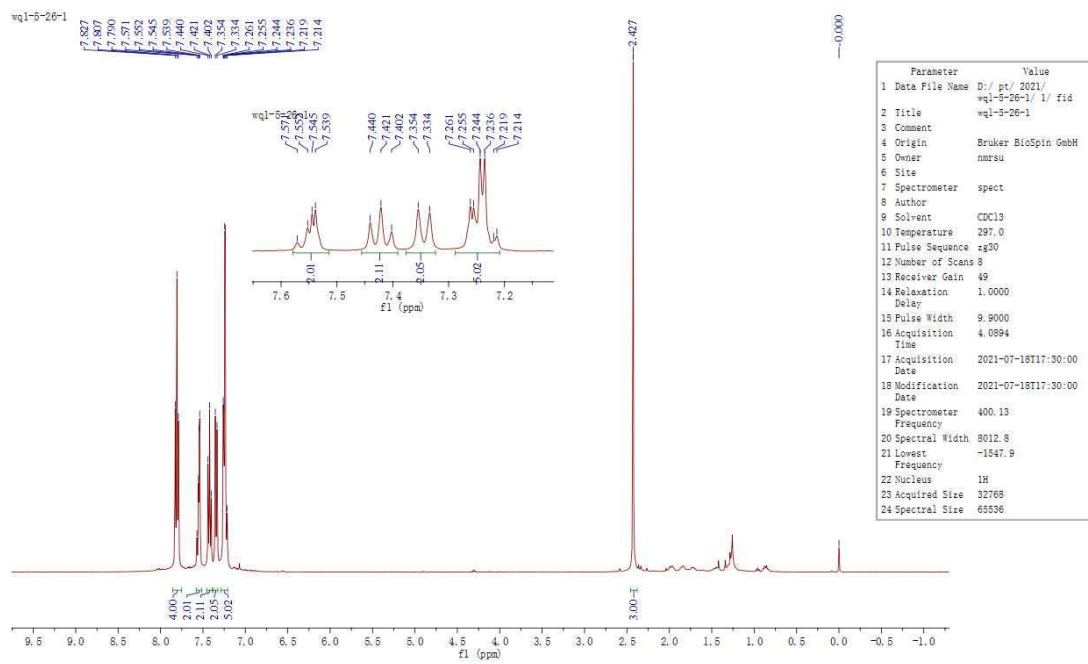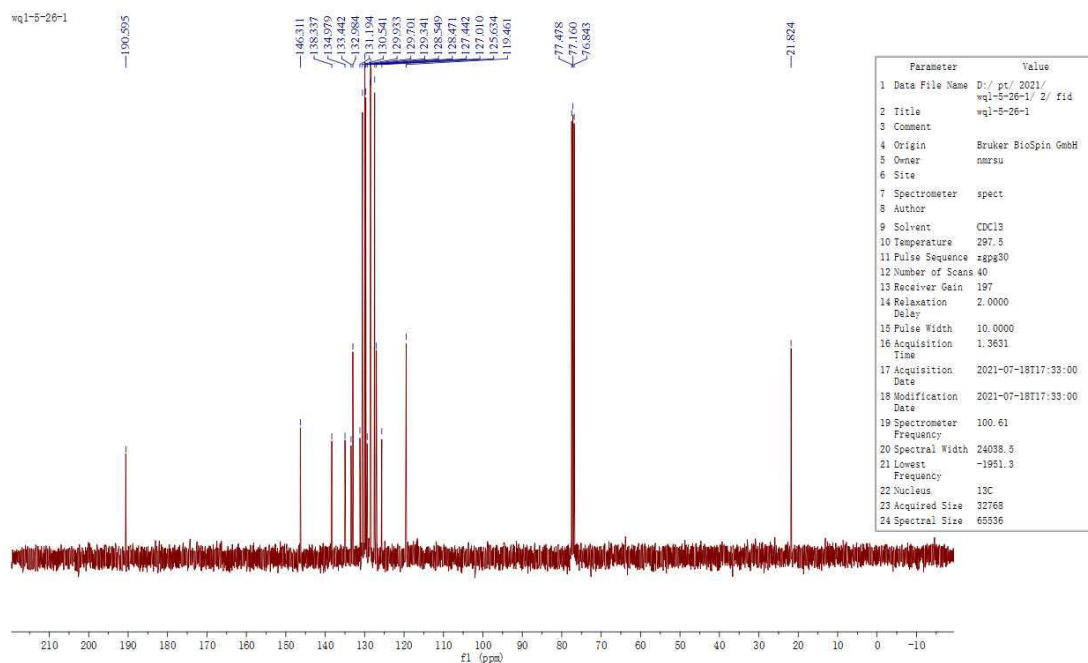

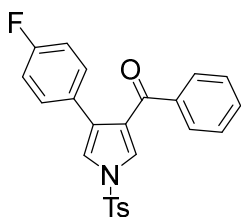

2d

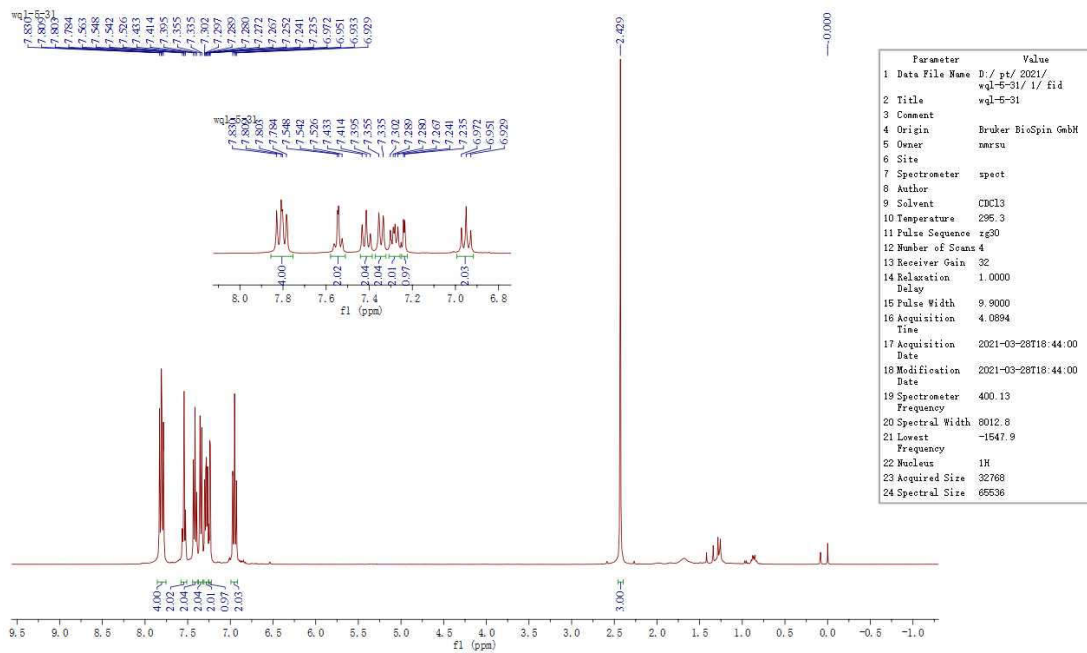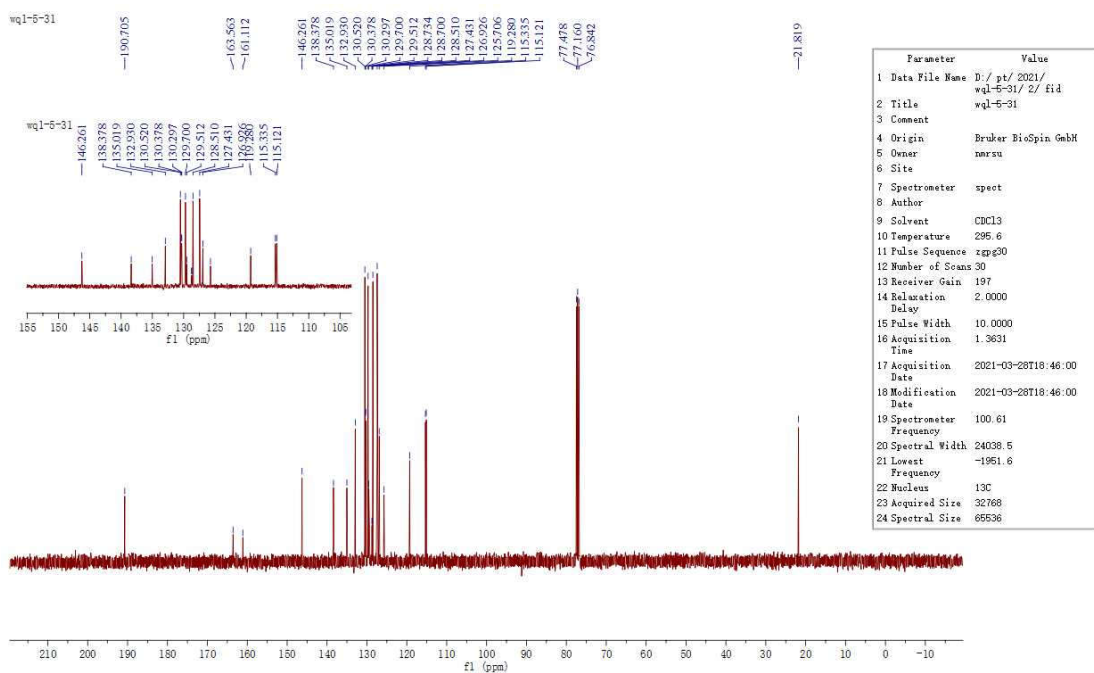

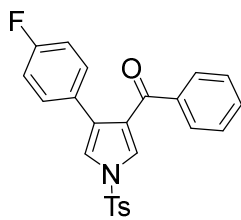

2d

wq1-5-31-a1

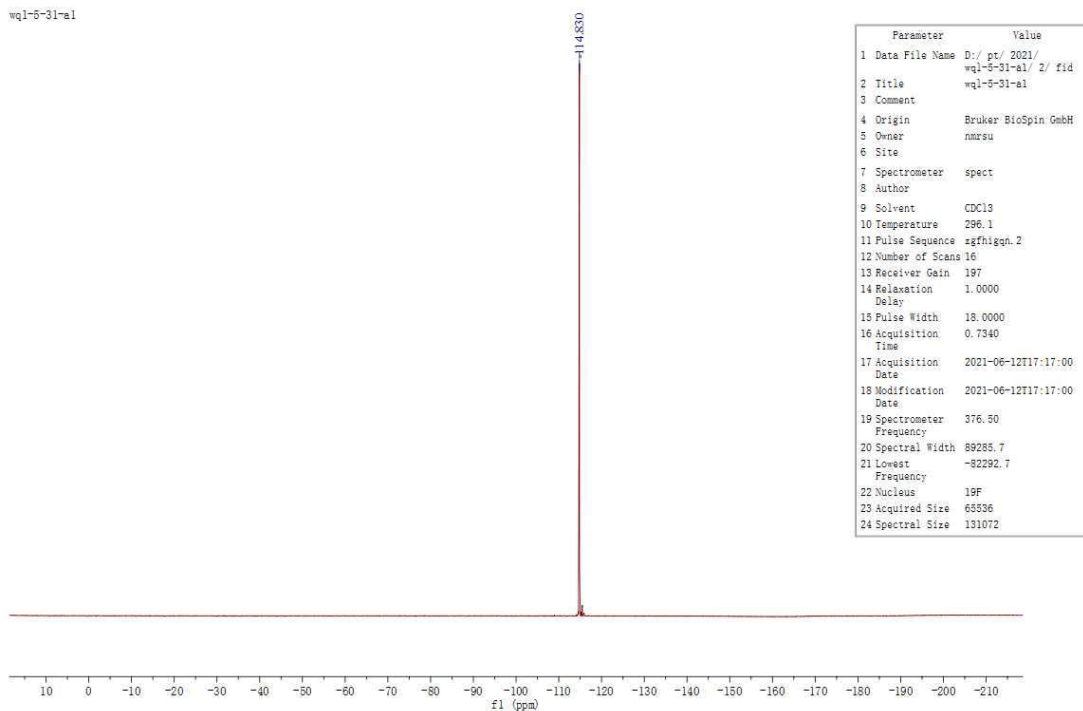

wq1-5-31-F

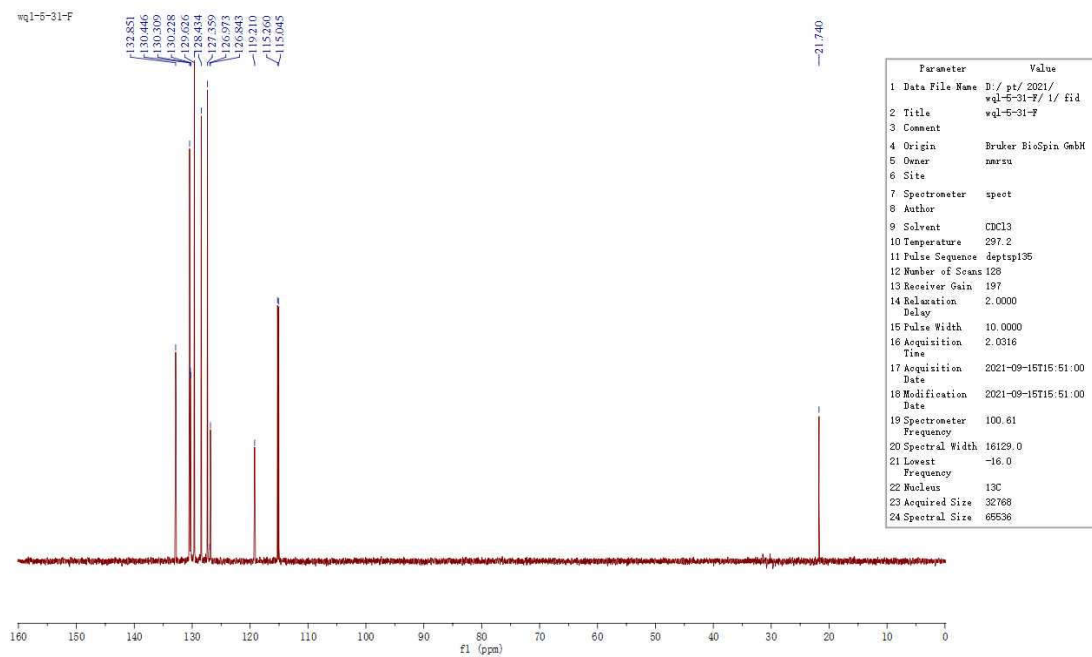



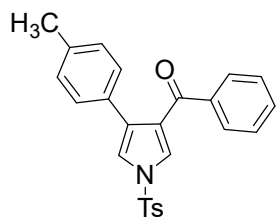

2e

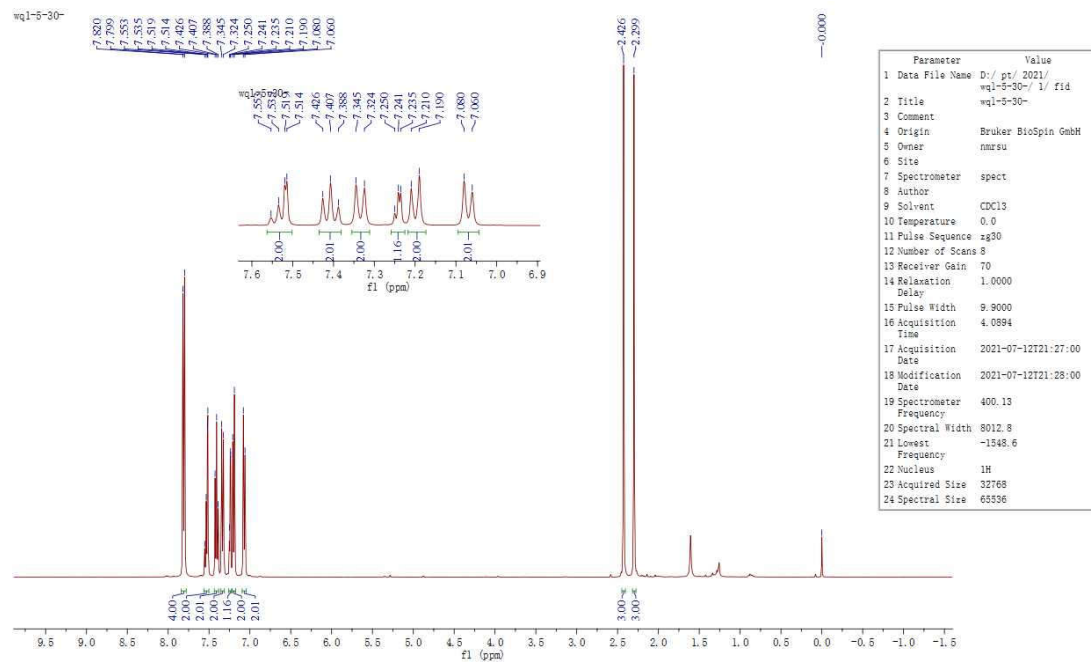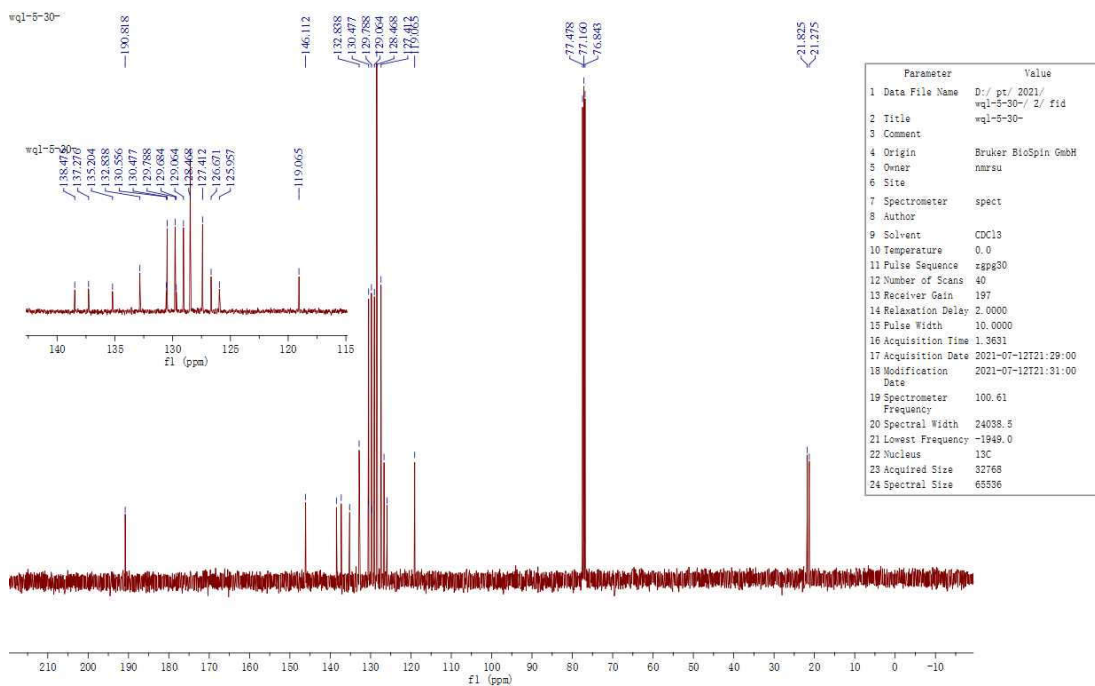







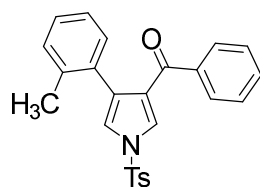

2h

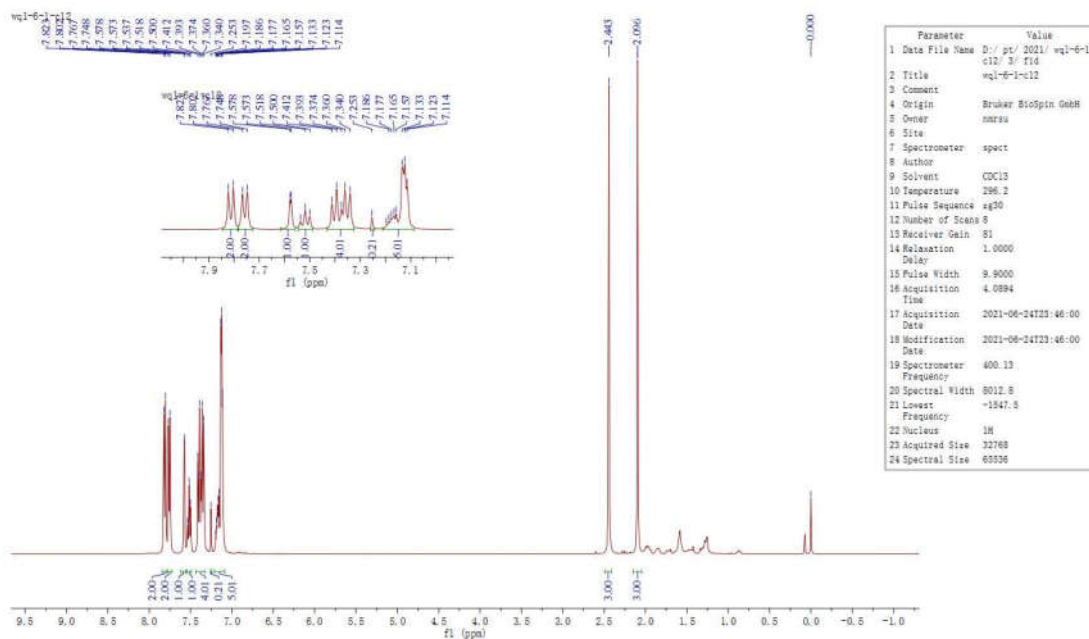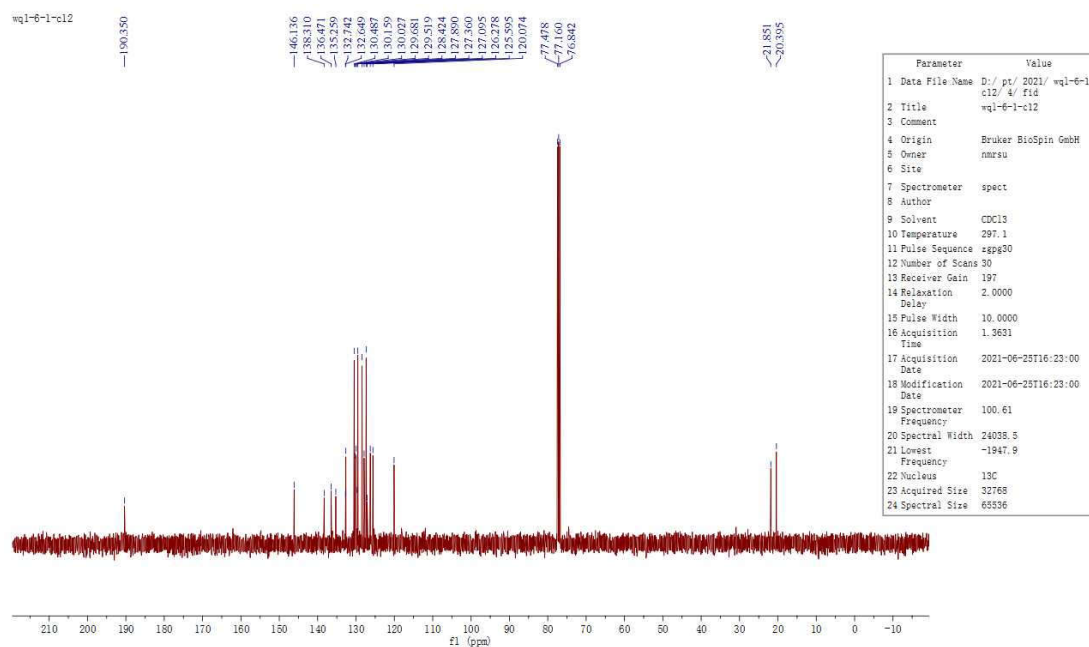

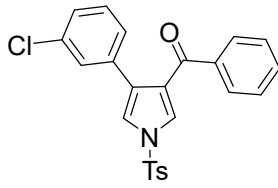

2i

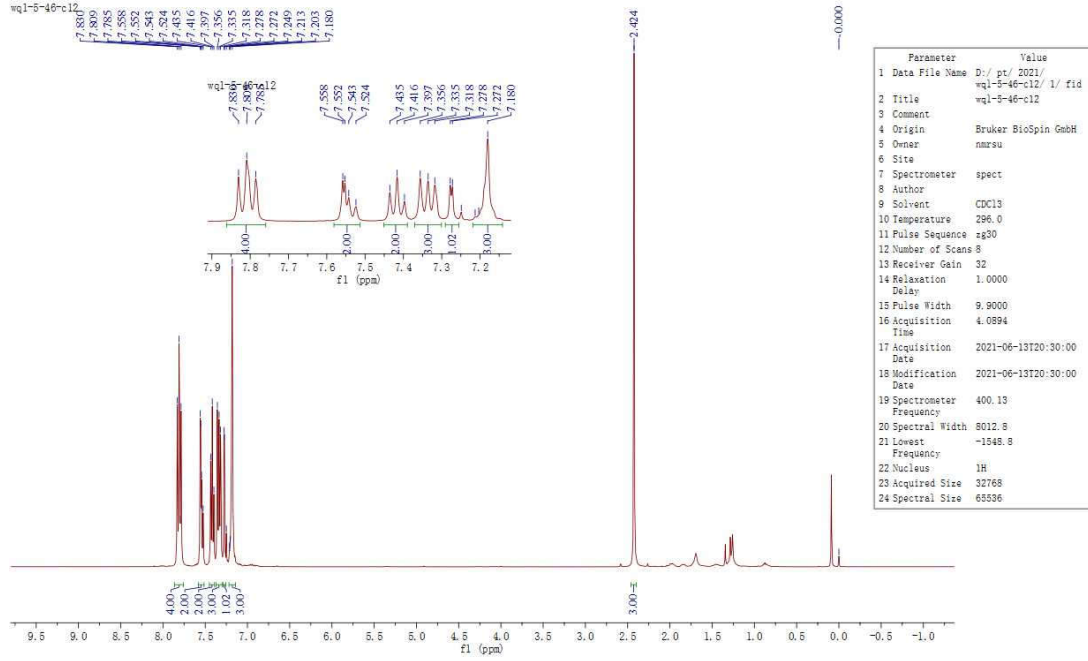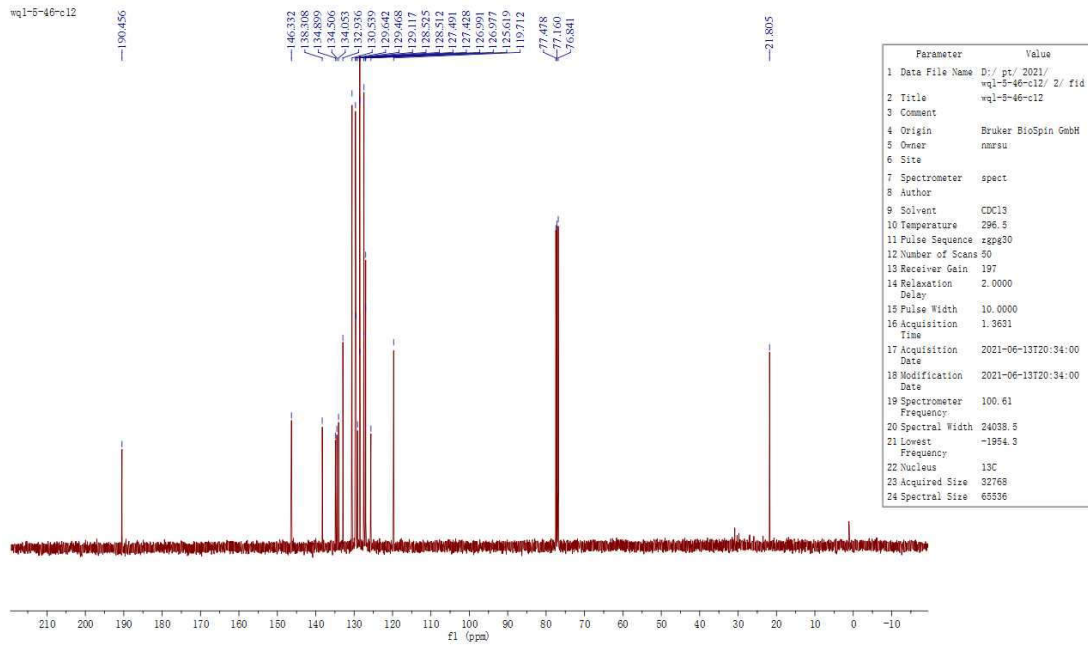

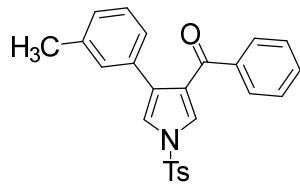

2j

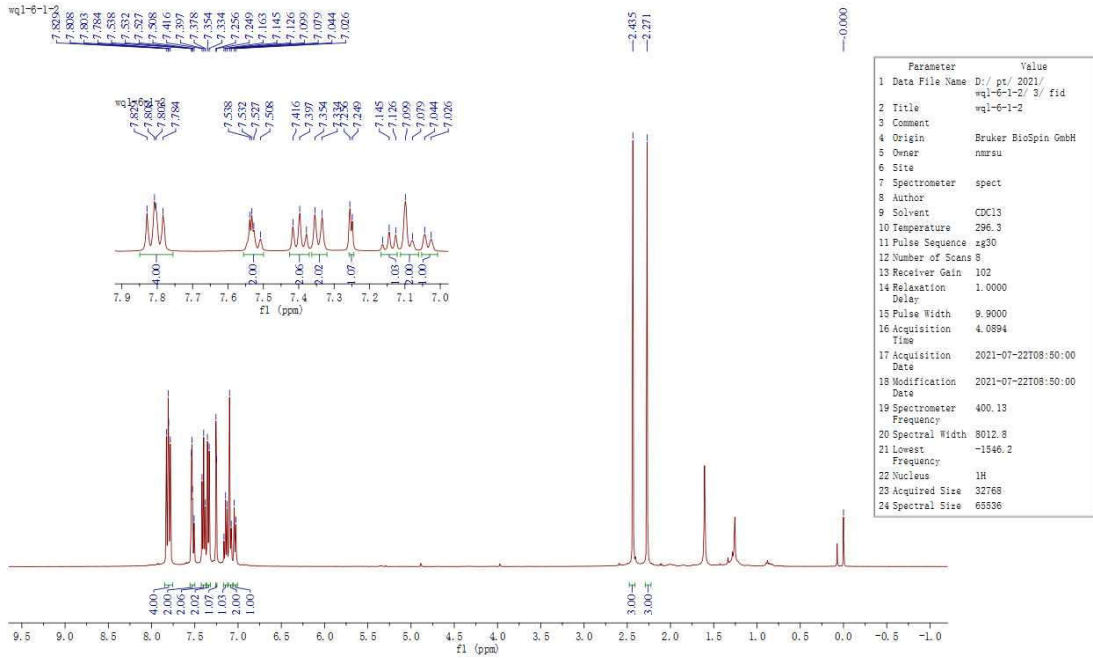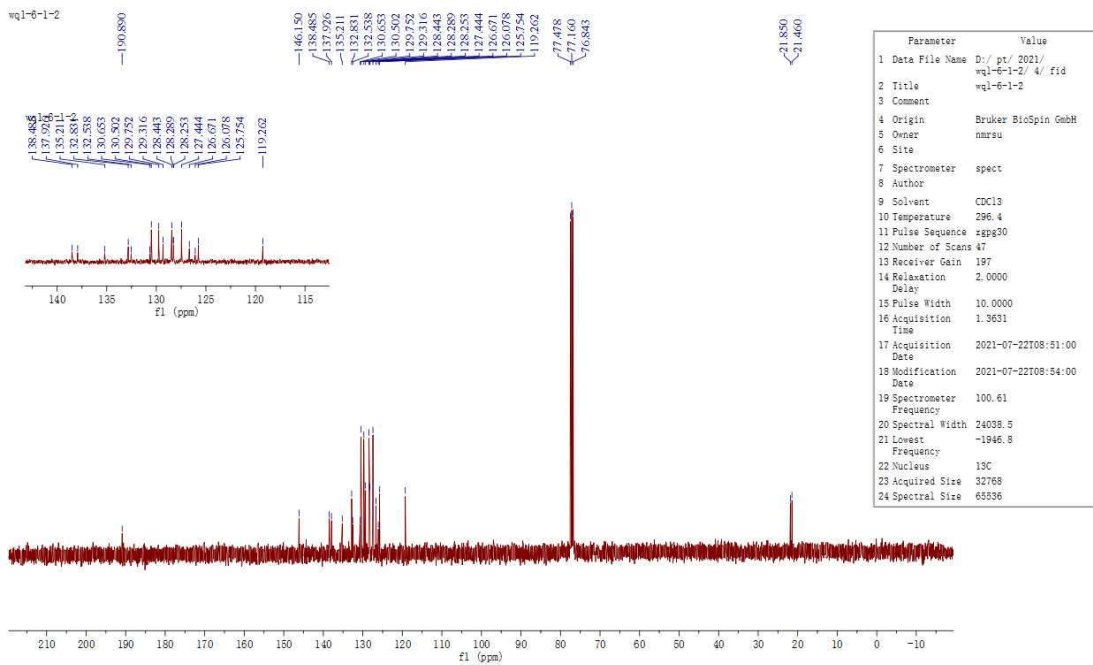

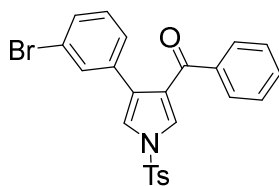

2k

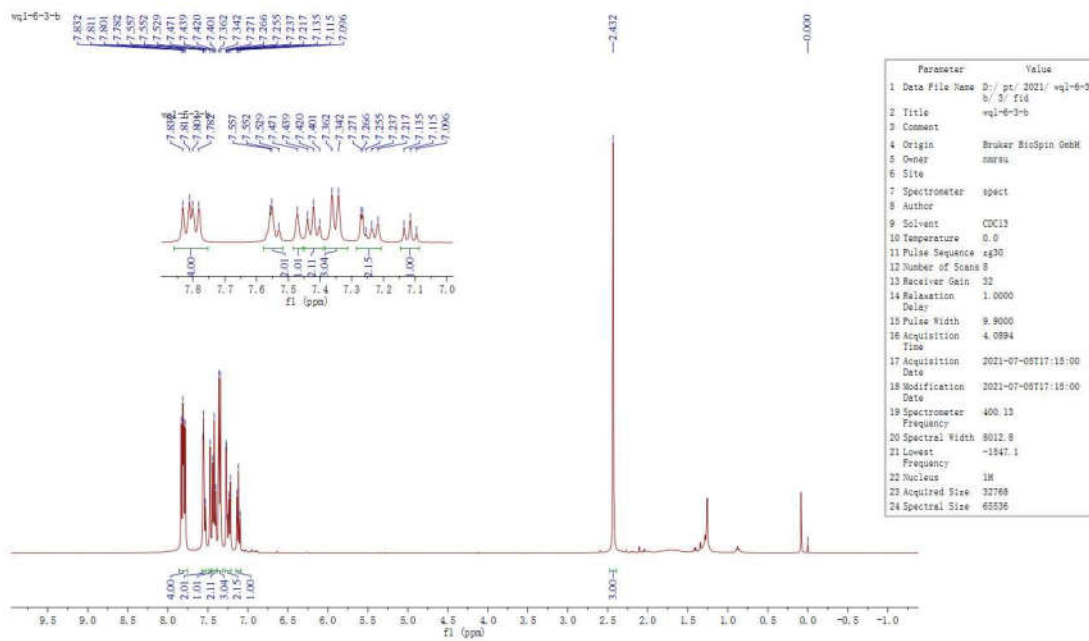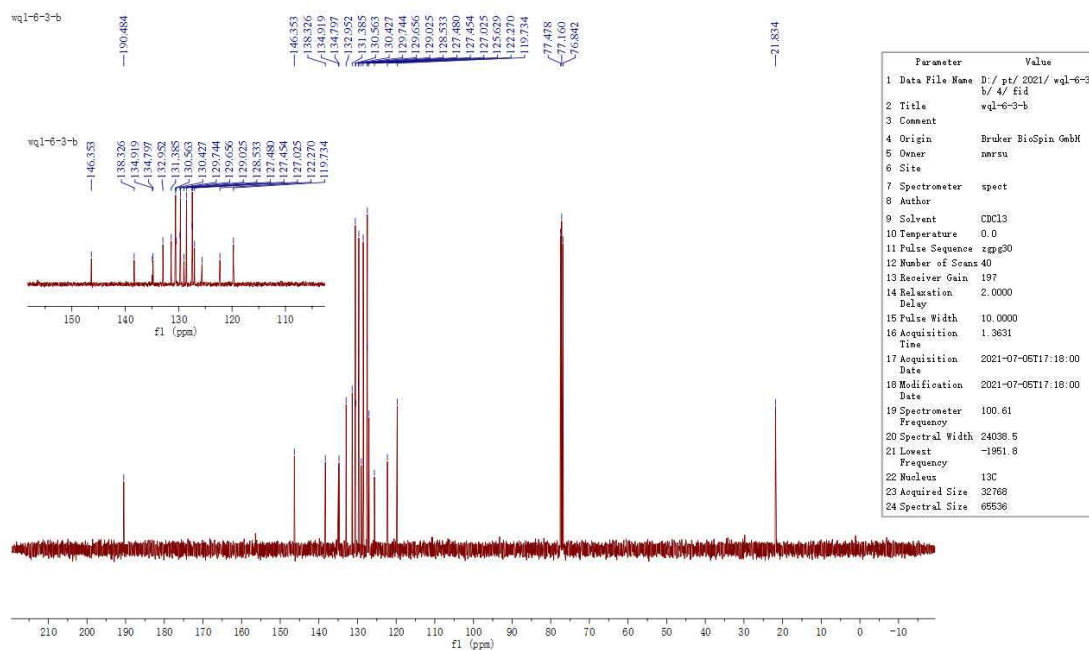





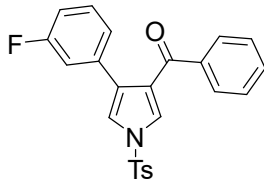

21

wq1-6-1-a1

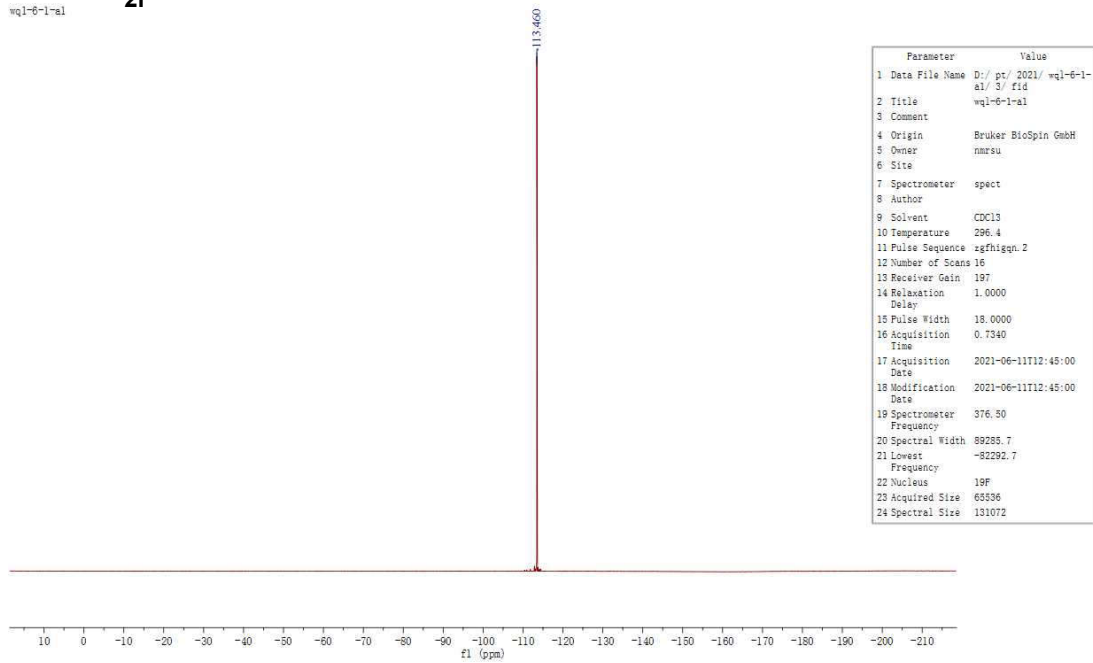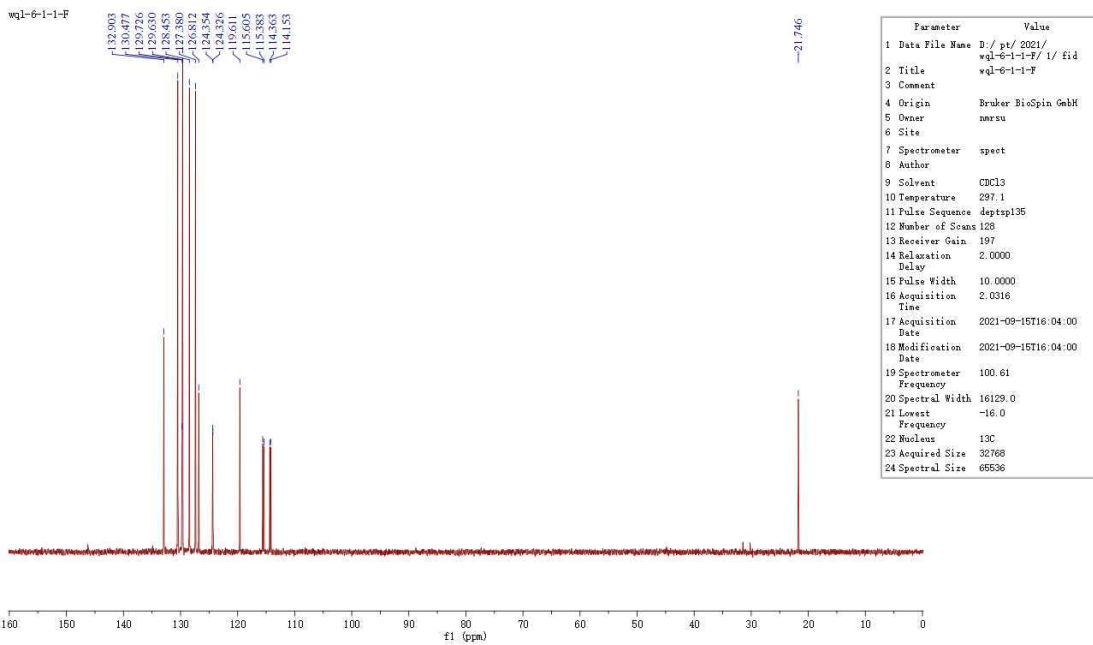



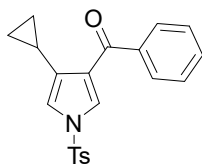

2m

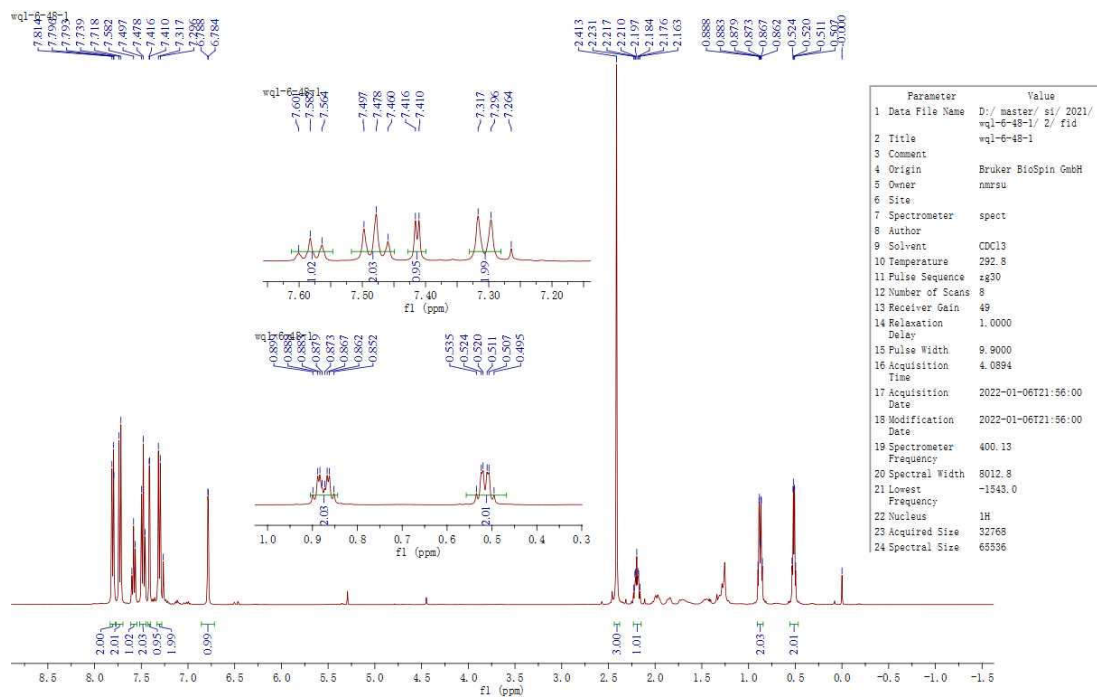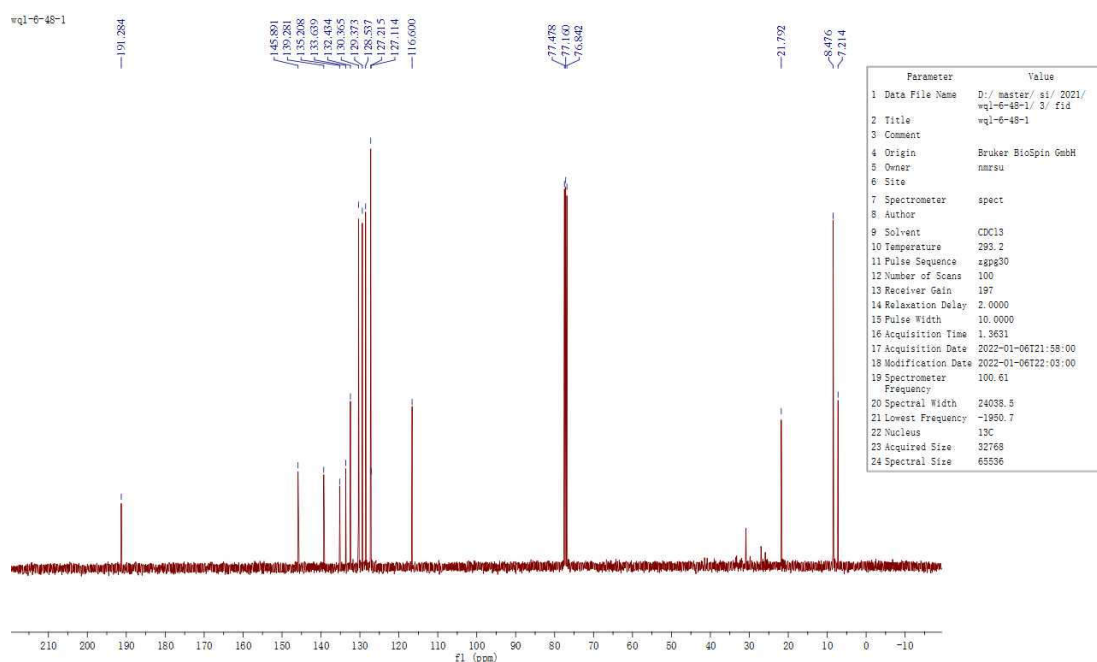

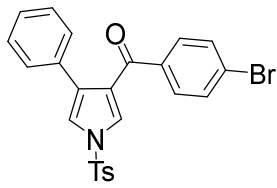

2n

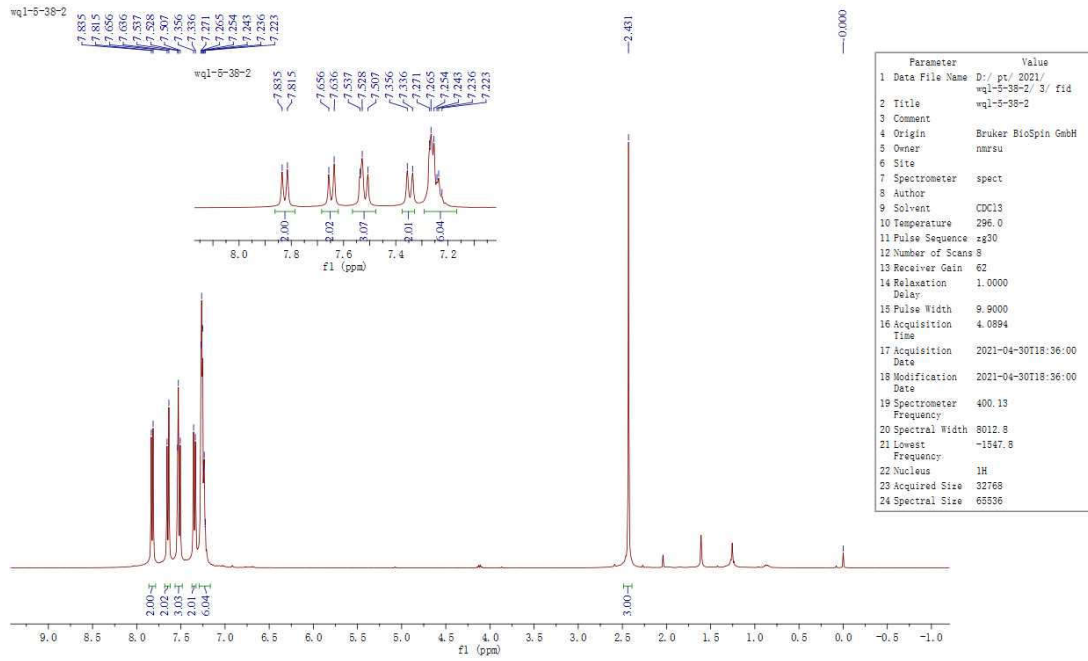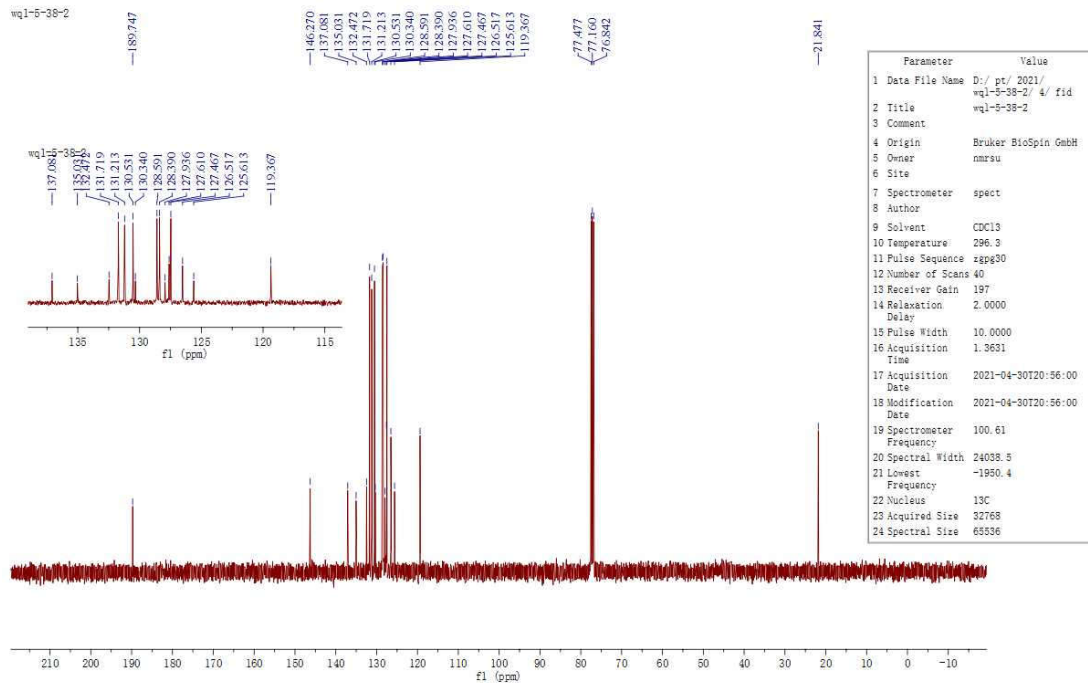



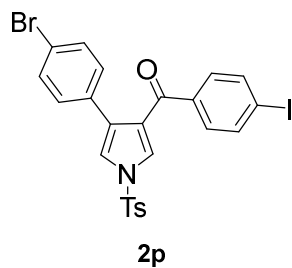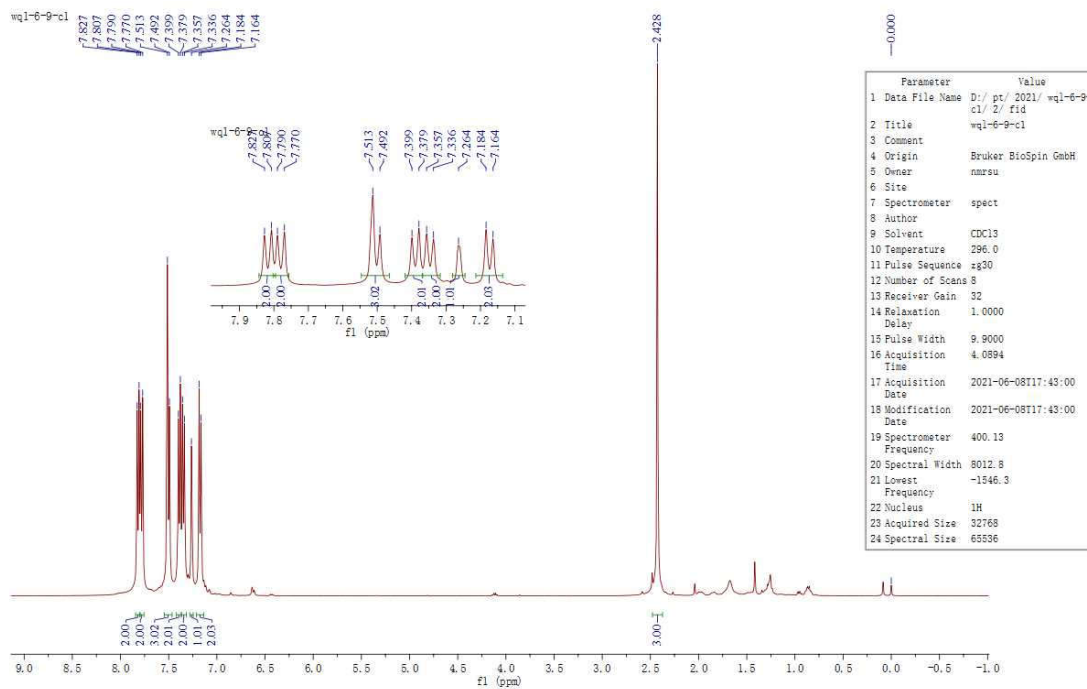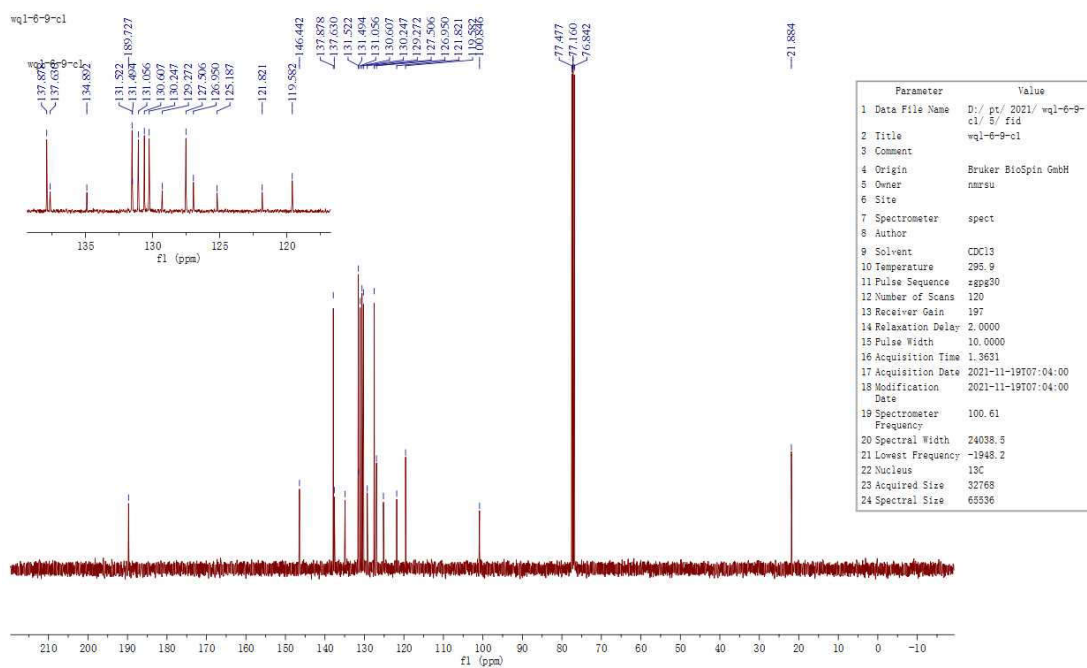

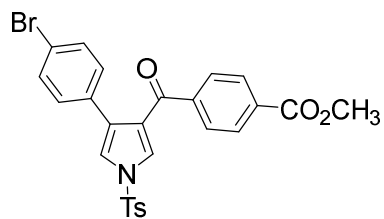

2q

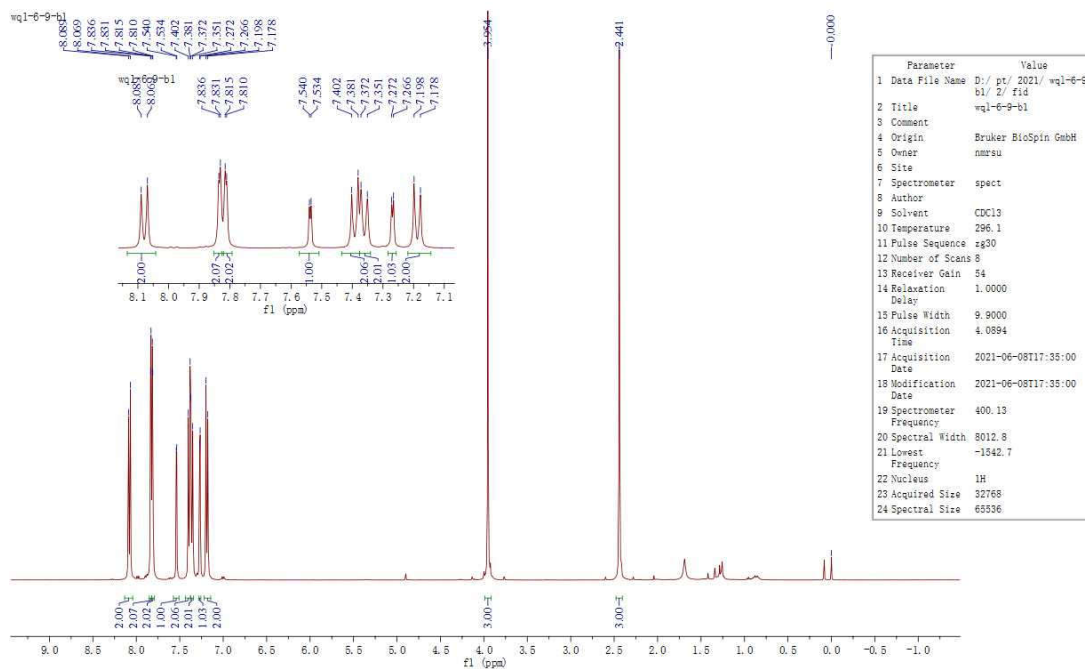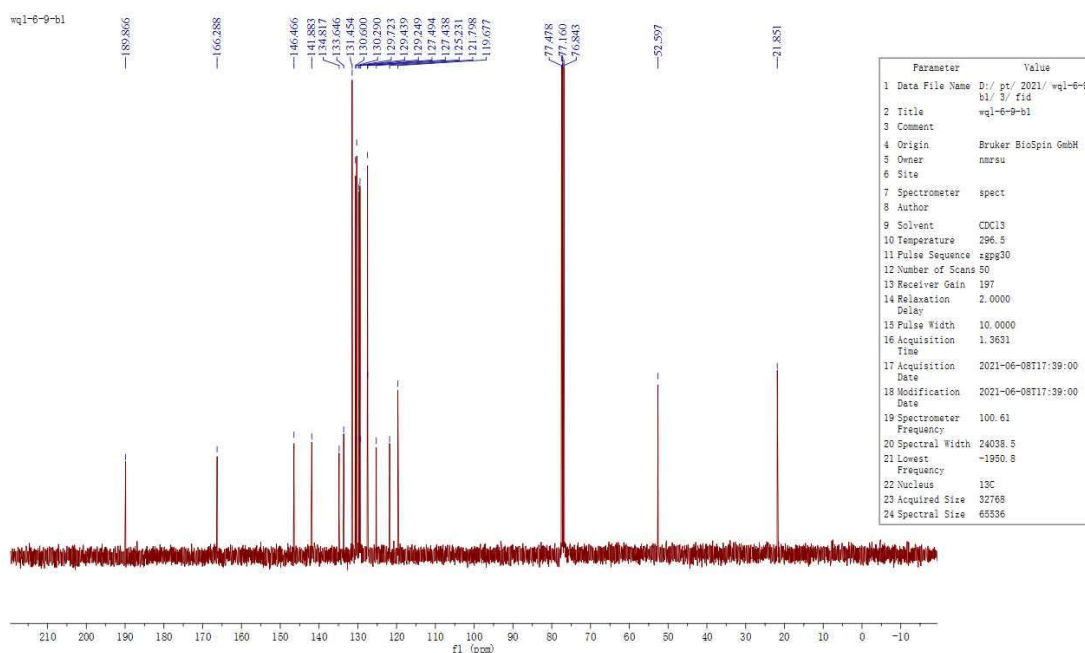

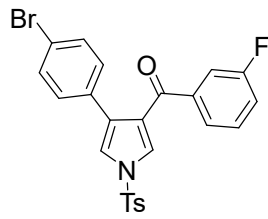

2r

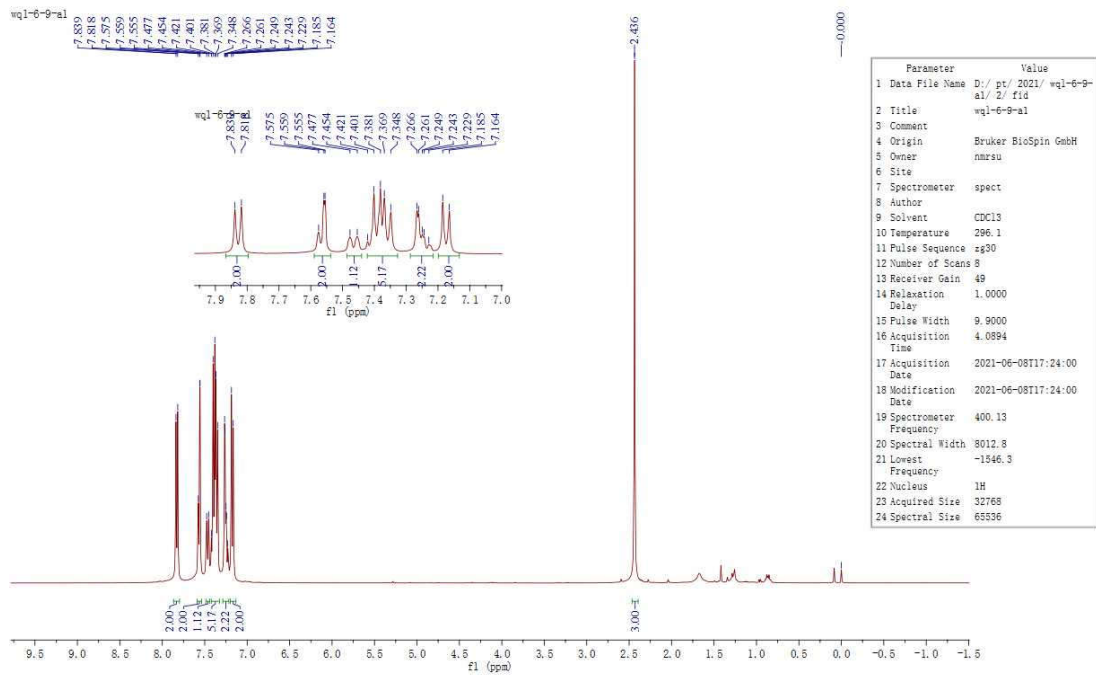

| Parameter                 | Value                       |
|---------------------------|-----------------------------|
| 1 Data File Name          | D:/pt/2021/wq1-6-9-a1/2/fid |
| 2 Title                   | wq1-6-9-a1                  |
| 3 Comment                 |                             |
| 4 Origin                  | Bruker BioSpin GmbH         |
| 5 Owner                   | nmsru                       |
| 6 Site                    |                             |
| 7 Spectrometer            | spect                       |
| 8 Author                  |                             |
| 9 Solvent                 | CDCl3                       |
| 10 Temperature            | 296.1                       |
| 11 Pulse Sequence         | zg30                        |
| 12 Number of Scans        | 8                           |
| 13 Receiver Gain          | 49                          |
| 14 Relaxation Delay       | 1.0000                      |
| 15 Pulse Width            | 9.9000                      |
| 16 Acquisition Time       | 4.0894                      |
| 17 Acquisition Date       | 2021-06-08T17:24:00         |
| 18 Modification Date      | 2021-06-08T17:24:00         |
| 19 Spectrometer Frequency | 400.13                      |
| 20 Spectral Width         | 8012.8                      |
| 21 Lowest Frequency       | -1546.3                     |
| 22 Nucleus                | 1H                          |
| 23 Acquired Size          | 32768                       |
| 24 Spectral Size          | 65536                       |

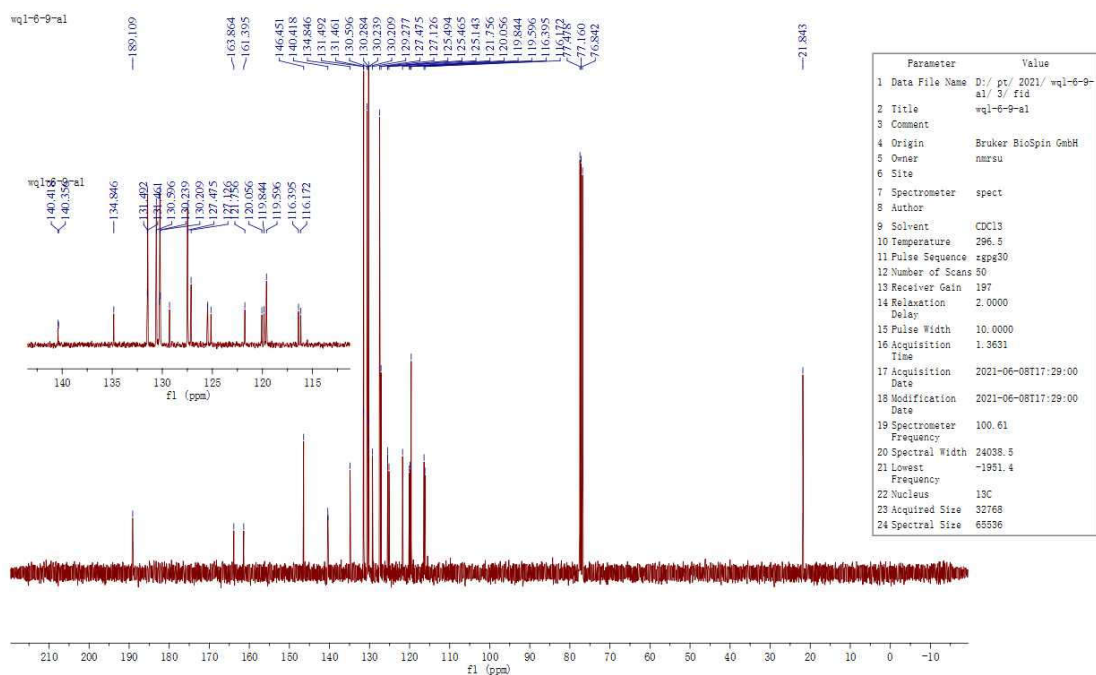

| Parameter                 | Value                       |
|---------------------------|-----------------------------|
| 1 Data File Name          | D:/pt/2021/wq1-6-9-a1/3/fid |
| 2 Title                   | wq1-6-9-a1                  |
| 3 Comment                 |                             |
| 4 Origin                  | Bruker BioSpin GmbH         |
| 5 Owner                   | nmsru                       |
| 6 Site                    |                             |
| 7 Spectrometer            | spect                       |
| 8 Author                  |                             |
| 9 Solvent                 | CDCl3                       |
| 10 Temperature            | 296.5                       |
| 11 Pulse Sequence         | zgpg30                      |
| 12 Number of Scans        | 50                          |
| 13 Receiver Gain          | 197                         |
| 14 Relaxation Delay       | 2.0000                      |
| 15 Pulse Width            | 10.0000                     |
| 16 Acquisition Time       | 1.3631                      |
| 17 Acquisition Date       | 2021-06-08T17:29:00         |
| 18 Modification Date      | 2021-06-08T17:29:00         |
| 19 Spectrometer Frequency | 100.61                      |
| 20 Spectral Width         | 24038.5                     |
| 21 Lowest Frequency       | -1991.4                     |
| 22 Nucleus                | 13C                         |
| 23 Acquired Size          | 32768                       |
| 24 Spectral Size          | 65536                       |

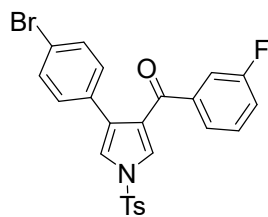

**2r**

wq1-6-9-a1

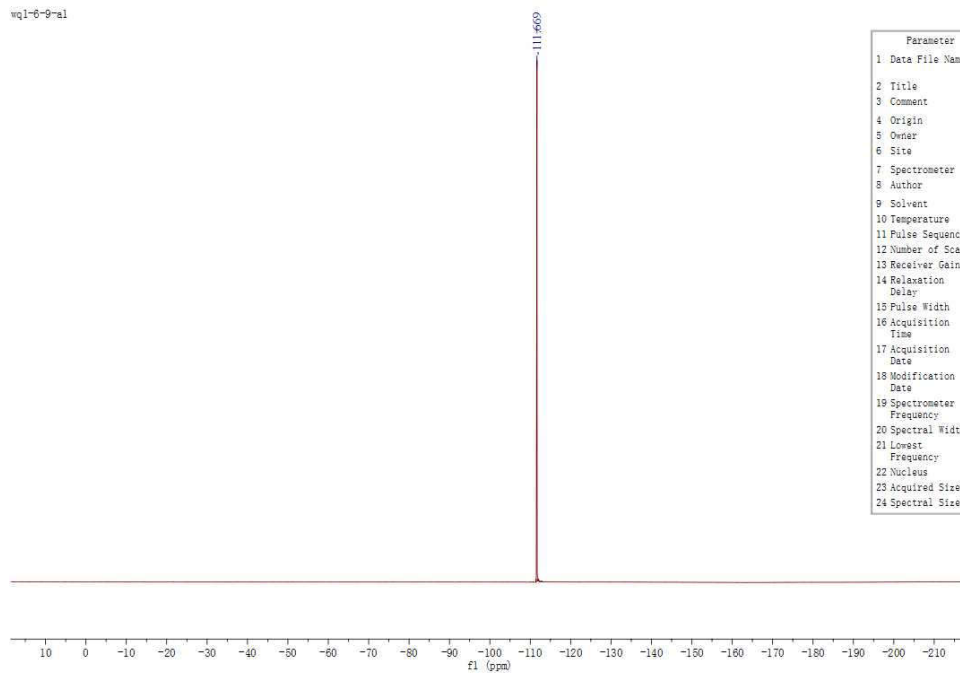

| Parameter                 | Value                       |
|---------------------------|-----------------------------|
| 1 Data File Name          | D:/pt/2021/wq1-6-9-a1/4/fid |
| 2 Title                   | wq1-6-9-a1                  |
| 3 Comment                 |                             |
| 4 Origin                  | Bruker BioSpin GmbH         |
| 5 Owner                   | nmsu                        |
| 6 Site                    |                             |
| 7 Spectrometer            | spect                       |
| 8 Author                  |                             |
| 9 Solvent                 | CDCl3                       |
| 10 Temperature            | 296.3                       |
| 11 Pulse Sequence         | zgpg30m.2                   |
| 12 Number of Scans        | 16                          |
| 13 Receiver Gain          | 197                         |
| 14 Relaxation Delay       | 1.0000                      |
| 15 Pulse Width            | 18.0000                     |
| 16 Acquisition Time       | 0.7340                      |
| 17 Acquisition Date       | 2021-06-08T23:55:41         |
| 18 Modification Date      | 2021-06-08T23:55:00         |
| 19 Spectrometer Frequency | 376.46                      |
| 20 Spectral Width         | 89295.7                     |
| 21 Lowest Frequency       | -82292.7                    |
| 22 Nucleus                | 1H                          |
| 23 Acquired Size          | 65536                       |
| 24 Spectral Size          | 131072                      |

wq1-6-9-1-F

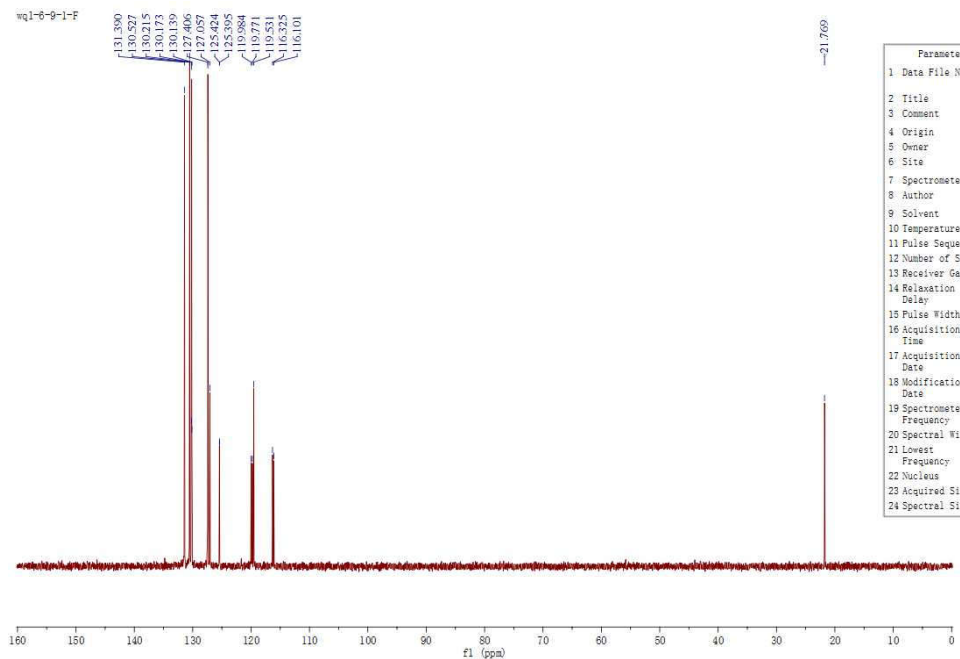

| Parameter                 | Value                        |
|---------------------------|------------------------------|
| 1 Data File Name          | D:/pt/2021/wq1-6-9-1-F/1/fid |
| 2 Title                   | wq1-6-9-1-F                  |
| 3 Comment                 |                              |
| 4 Origin                  | Bruker BioSpin GmbH          |
| 5 Owner                   | nmsu                         |
| 6 Site                    |                              |
| 7 Spectrometer            | spect                        |
| 8 Author                  |                              |
| 9 Solvent                 | CDCl3                        |
| 10 Temperature            | 297.4                        |
| 11 Pulse Sequence         | deptsq135                    |
| 12 Number of Scans        | 81                           |
| 13 Receiver Gain          | 197                          |
| 14 Relaxation Delay       | 2.0000                       |
| 15 Pulse Width            | 10.0000                      |
| 16 Acquisition Time       | 2.0316                       |
| 17 Acquisition Date       | 2021-09-15T16:29:00          |
| 18 Modification Date      | 2021-09-15T16:30:00          |
| 19 Spectrometer Frequency | 100.61                       |
| 20 Spectral Width         | 16129.0                      |
| 21 Lowest Frequency       | -16.0                        |
| 22 Nucleus                | 13C                          |
| 23 Acquired Size          | 32768                        |
| 24 Spectral Size          | 65536                        |



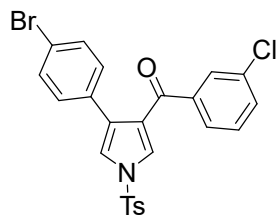

2s

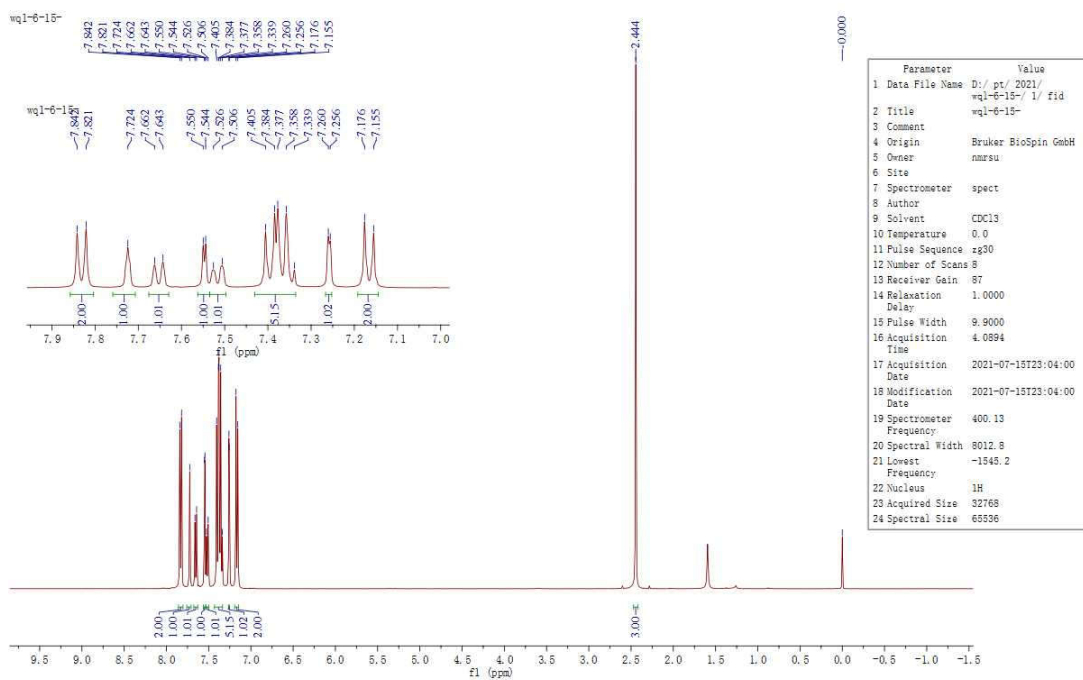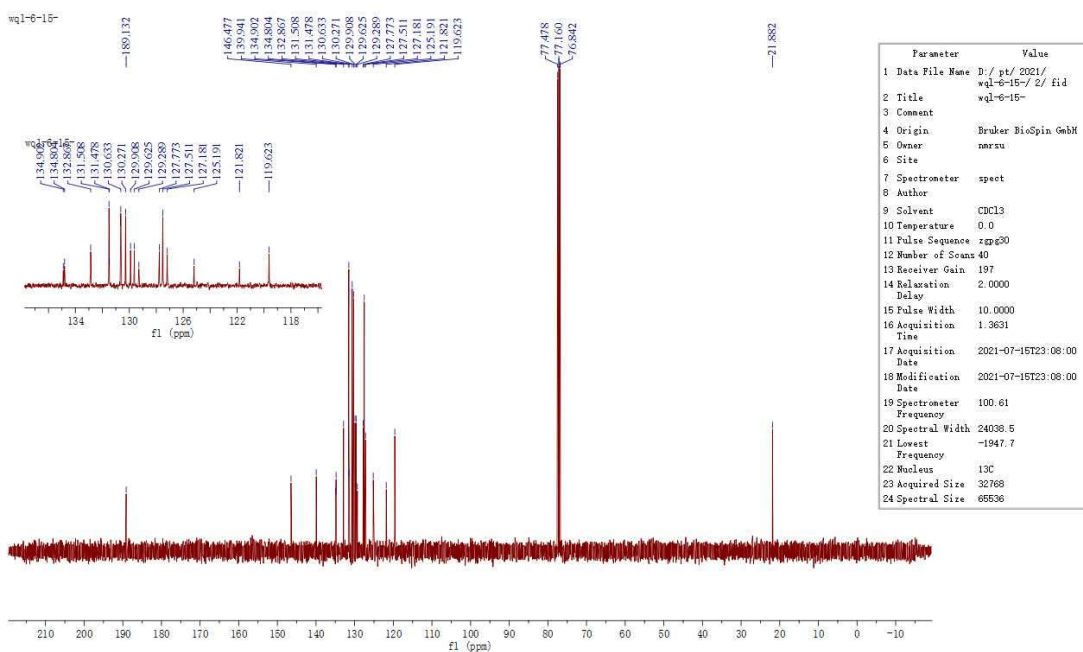



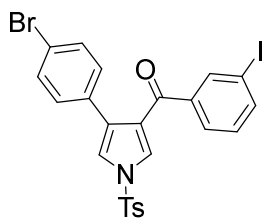

2t

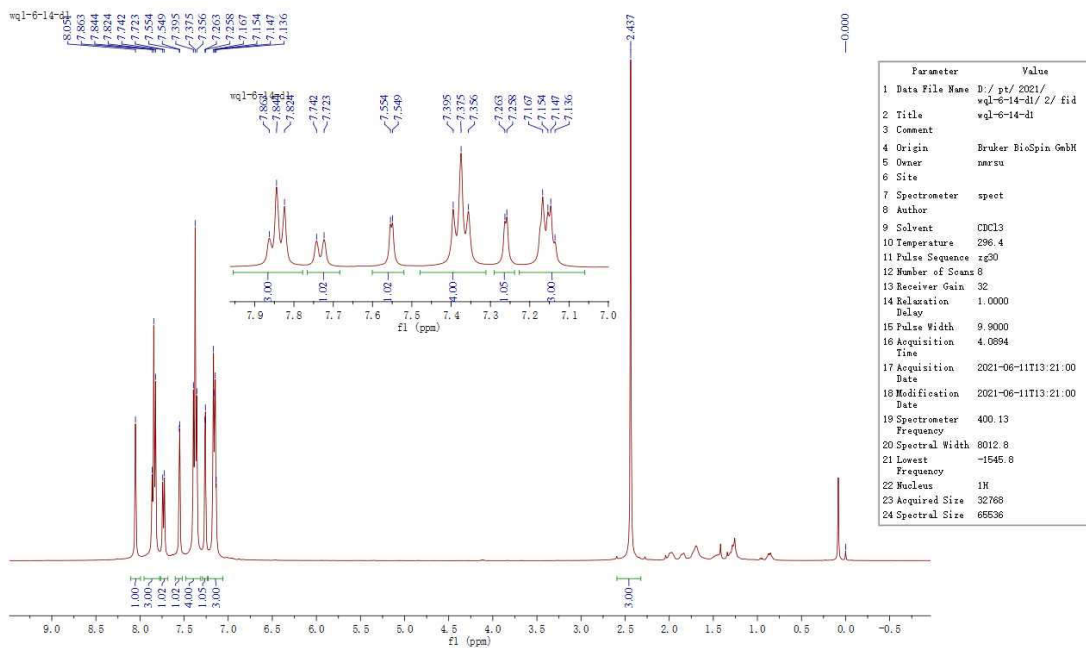

| Parameter          | Value                         |
|--------------------|-------------------------------|
| 1 Data File Name   | D:/pt/2021/wq1-6-14-d1/2/ f1d |
| 2 Title            | wq1-6-14-d1                   |
| 3 Comment          |                               |
| 4 Origin           | Bruker BioSpin GmbH           |
| 5 Owner            | nrsu                          |
| 6 Site             |                               |
| 7 Spectrometer     | spect                         |
| 8 Author           |                               |
| 9 Solvent          | CDCl3                         |
| 10 Temperature     | 296.4                         |
| 11 Pulse Sequence  | zg30                          |
| 12 Number of Scans | 8                             |
| 13 Receiver Gain   | 32                            |
| 14 Relaxation      | 1.0000                        |
| 15 Delay           |                               |
| 16 Pulse Width     | 9.9000                        |
| 17 Acquisition     | 4.0894                        |
| 18 Time            |                               |
| 19 Acquisition     | 2021-06-11T13:21:00           |
| 20 Date            |                               |
| 21 Modification    | 2021-06-11T13:21:00           |
| 22 Date            |                               |
| 23 Spectrometer    | 400.13                        |
| 24 Frequency       |                               |
| 25 Spectral Width  | 8012.0                        |
| 26 Lowest          | -1545.0                       |
| 27 Frequency       |                               |
| 28 Nucleus         | 1H                            |
| 29 Acquired Size   | 32768                         |
| 30 Spectral Size   | 65536                         |

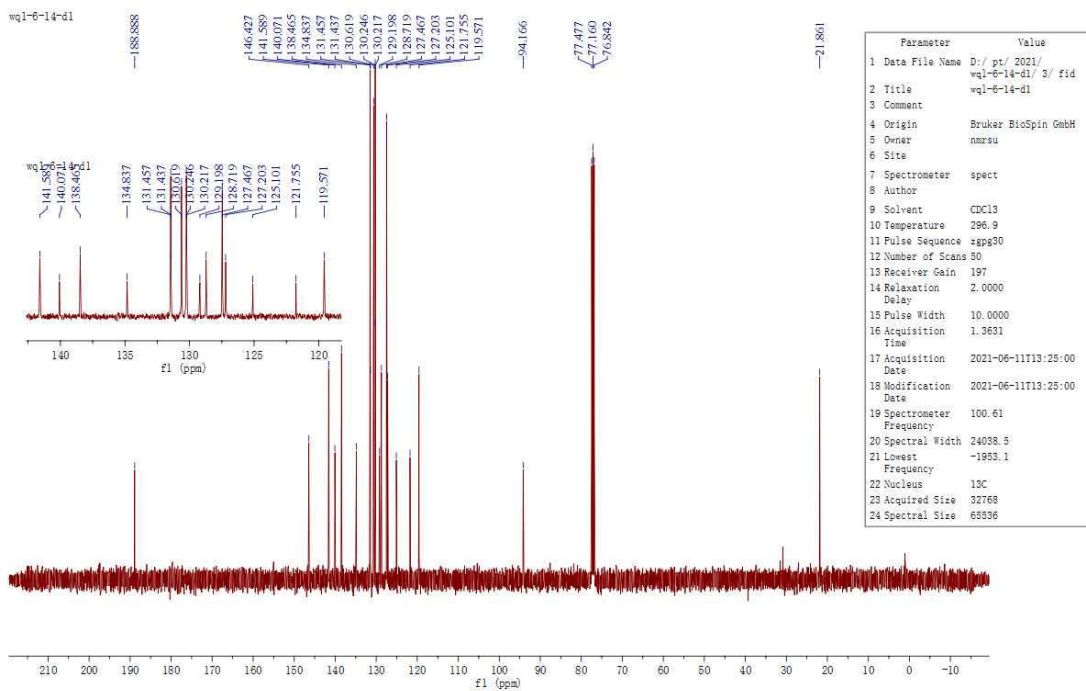

| Parameter          | Value                         |
|--------------------|-------------------------------|
| 1 Data File Name   | D:/pt/2021/wq1-6-14-d1/3/ f1d |
| 2 Title            | wq1-6-14-d1                   |
| 3 Comment          |                               |
| 4 Origin           | Bruker BioSpin GmbH           |
| 5 Owner            | nrsu                          |
| 6 Site             |                               |
| 7 Spectrometer     | spect                         |
| 8 Author           |                               |
| 9 Solvent          | CDCl3                         |
| 10 Temperature     | 296.9                         |
| 11 Pulse Sequence  | zgpg30                        |
| 12 Number of Scans | 80                            |
| 13 Receiver Gain   | 197                           |
| 14 Relaxation      | 2.0000                        |
| 15 Delay           |                               |
| 16 Pulse Width     | 10.0000                       |
| 17 Acquisition     | 1.3631                        |
| 18 Time            |                               |
| 19 Acquisition     | 2021-06-11T13:25:00           |
| 20 Date            |                               |
| 21 Modification    | 2021-06-11T13:25:00           |
| 22 Date            |                               |
| 23 Spectrometer    | 100.61                        |
| 24 Frequency       |                               |
| 25 Spectral Width  | 24038.5                       |
| 26 Lowest          | -1953.1                       |
| 27 Frequency       |                               |
| 28 Nucleus         | 13C                           |
| 29 Acquired Size   | 32768                         |
| 30 Spectral Size   | 65536                         |

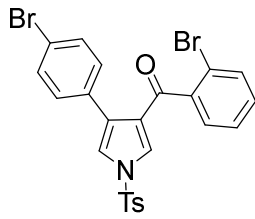

2u

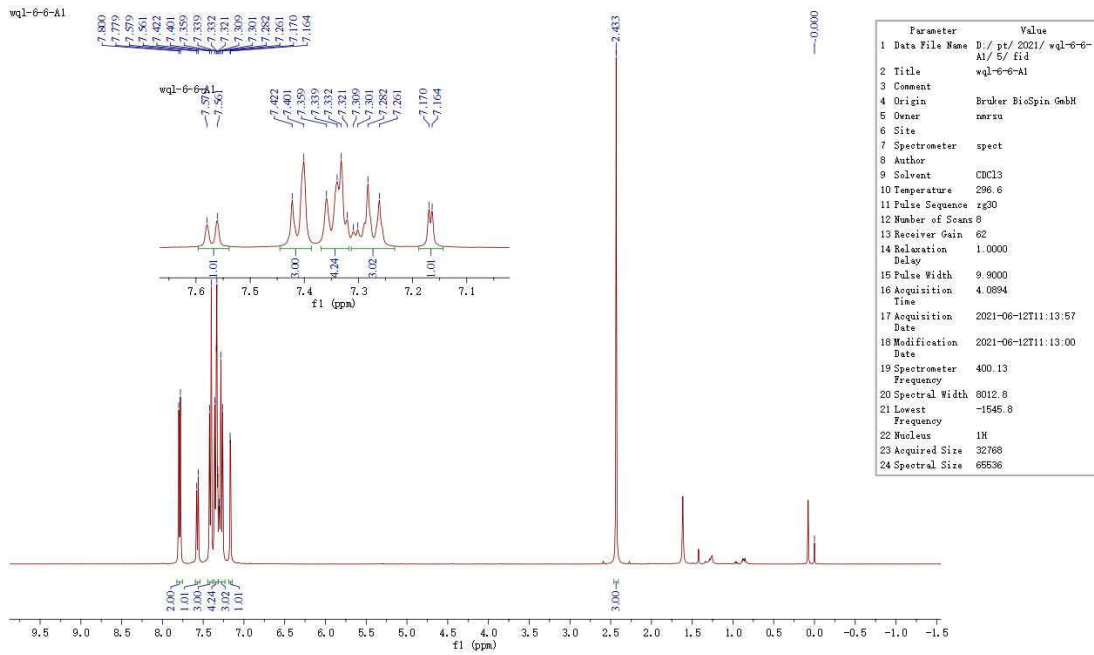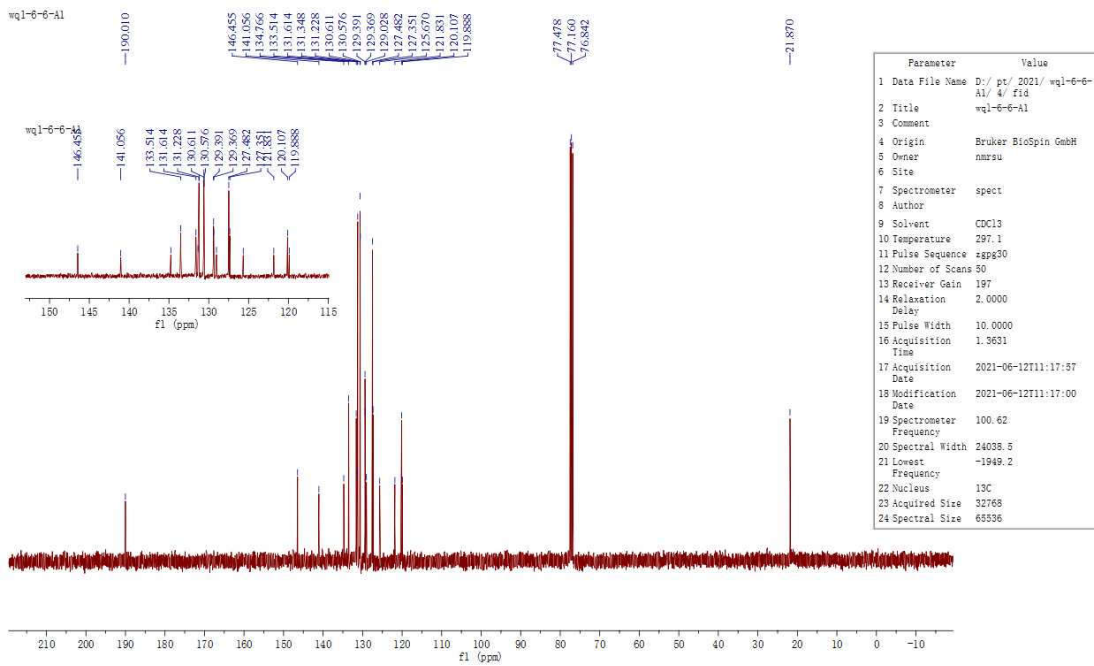

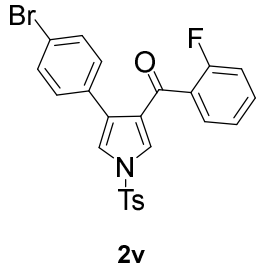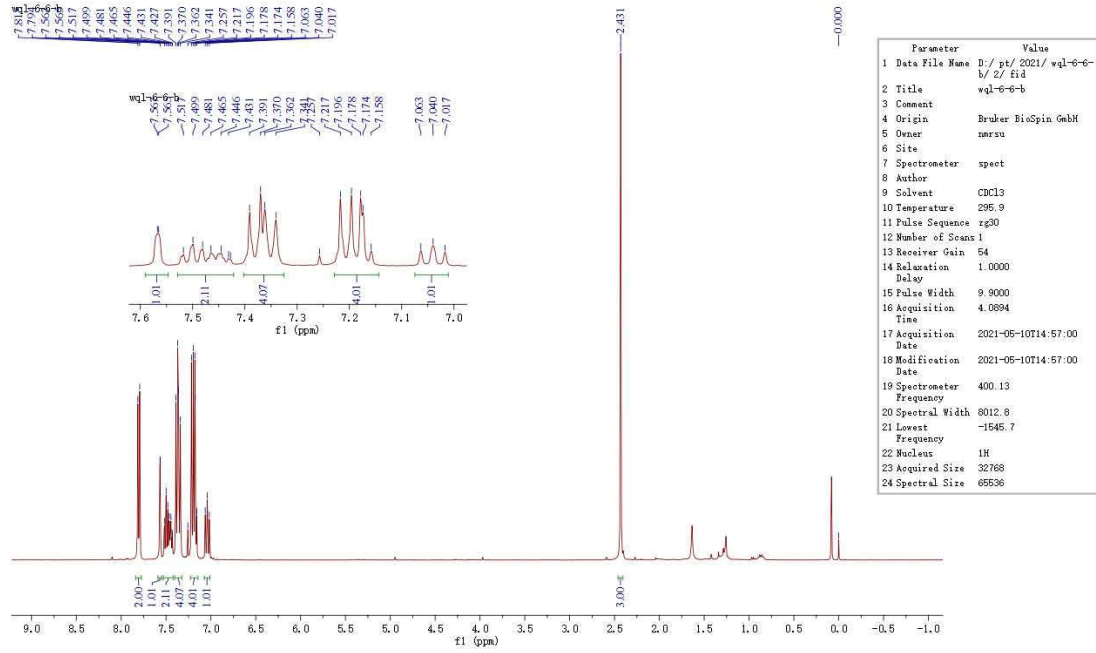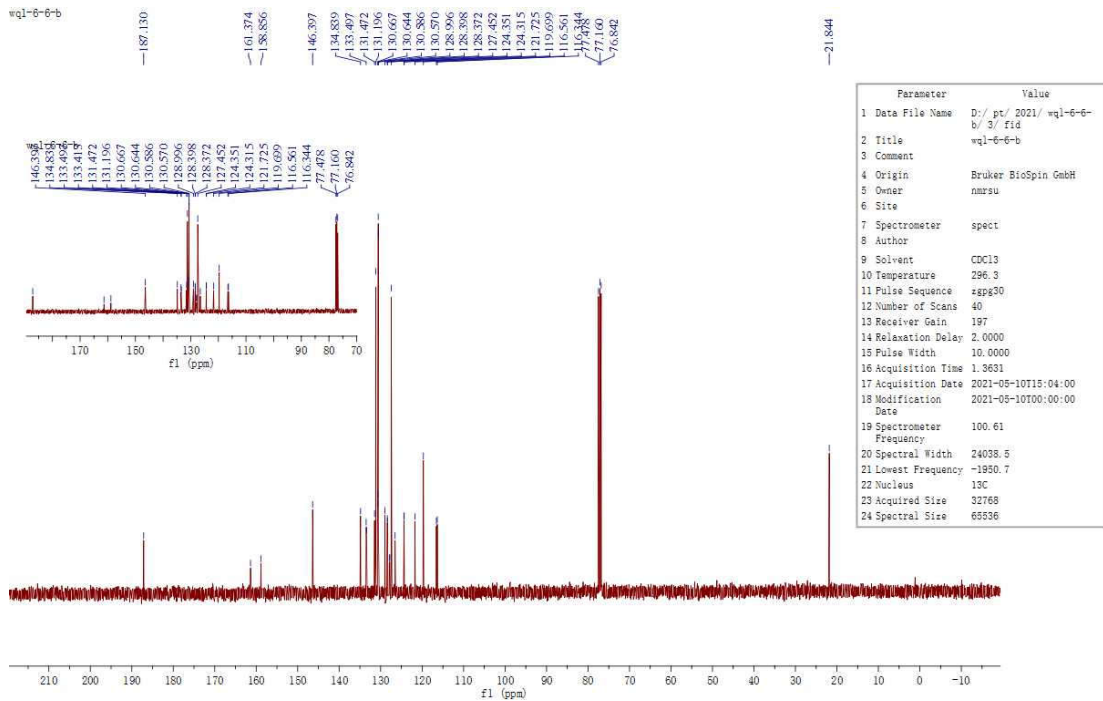

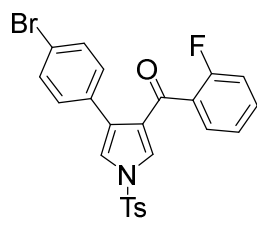

2v

wq1-6-6-B1

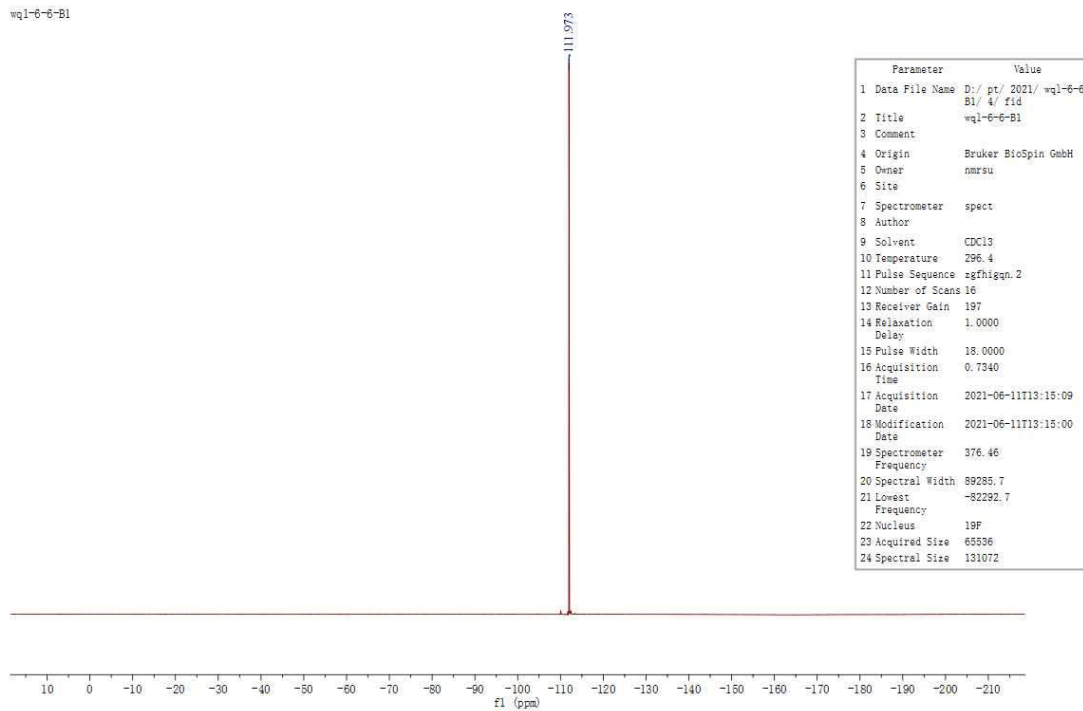

wq1-6-6-2-F

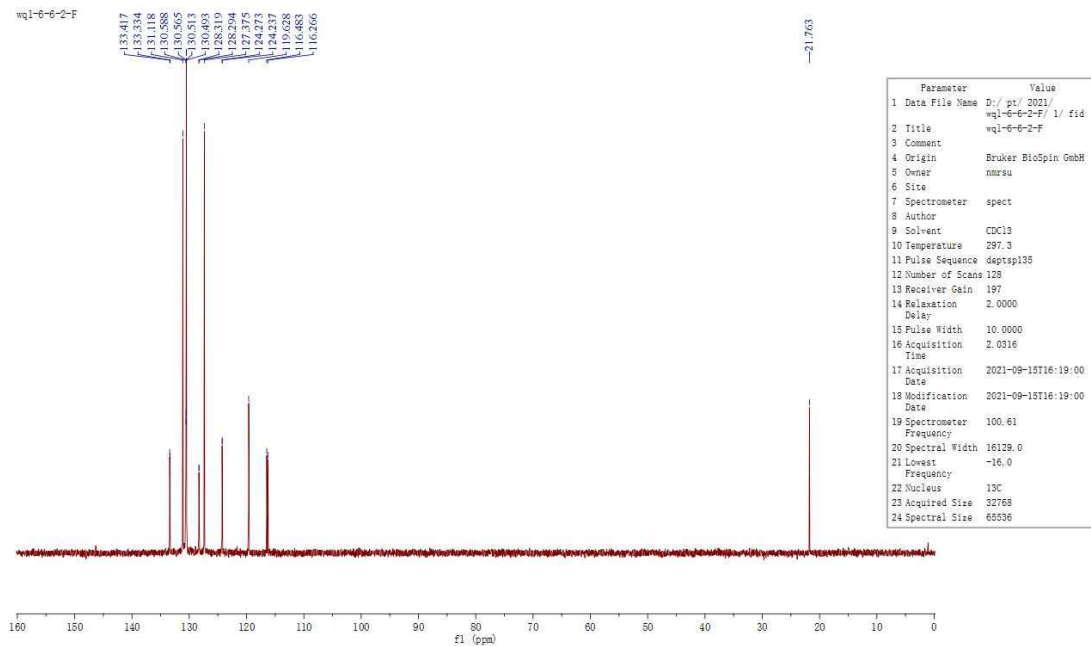

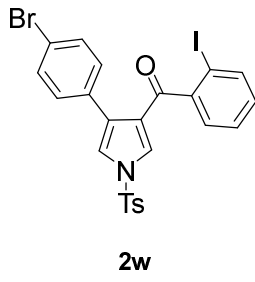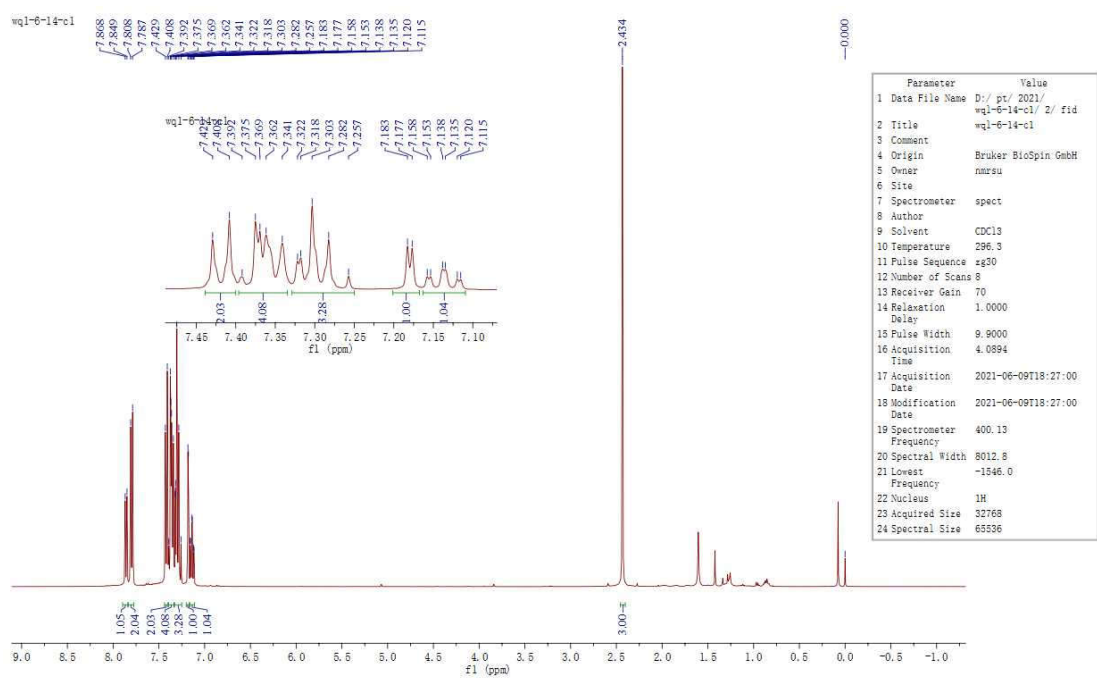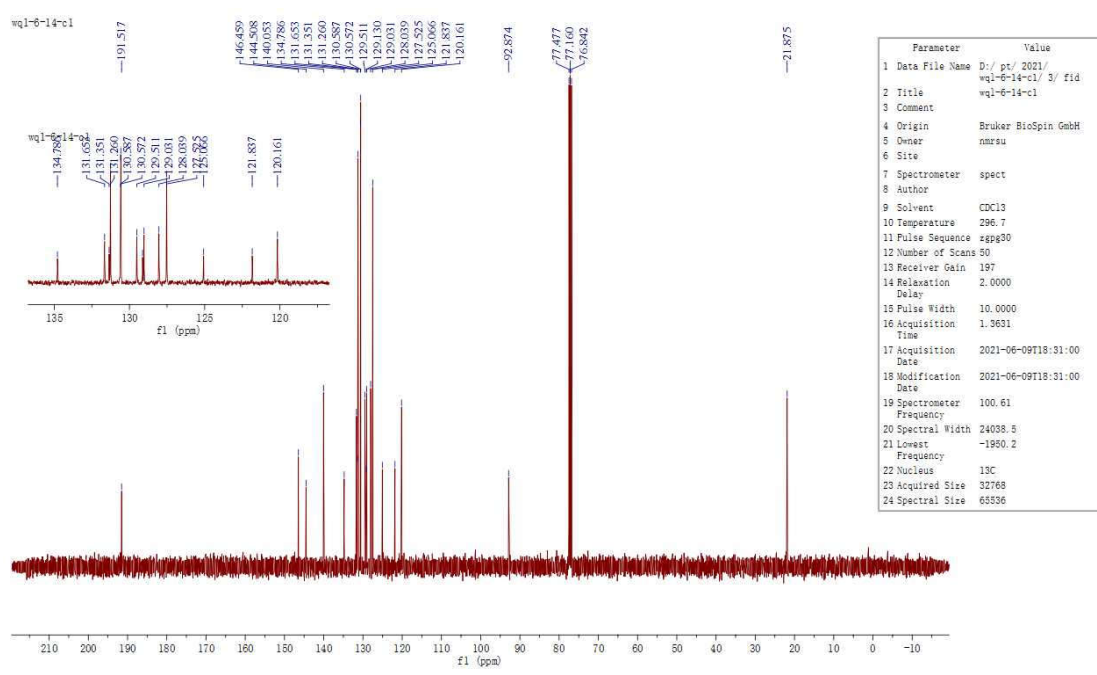

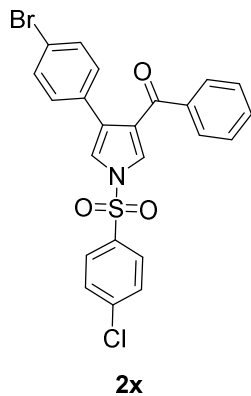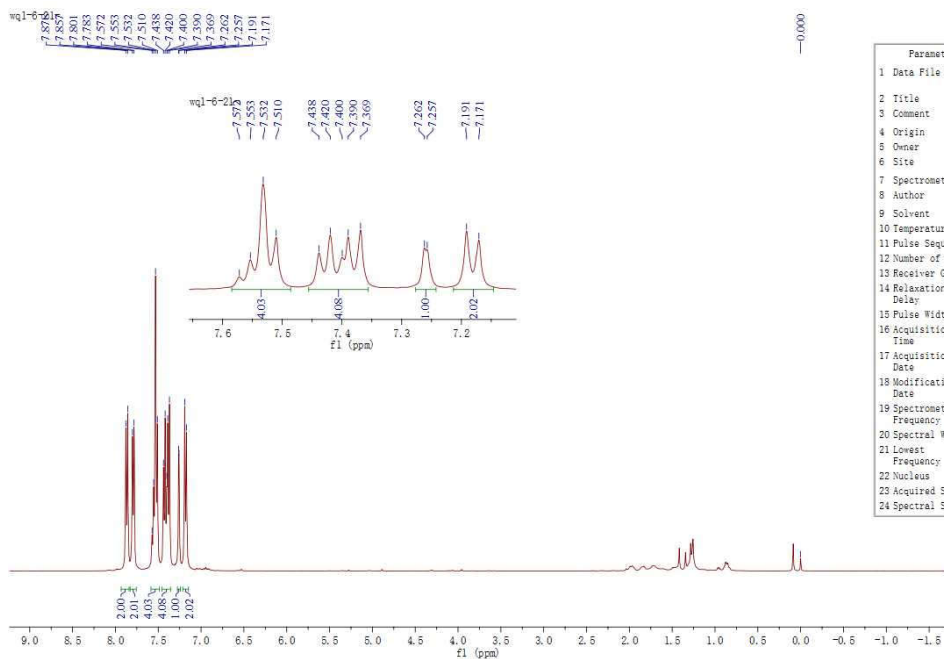

| Parameter                 | Value                           |
|---------------------------|---------------------------------|
| 1 Data File Name          | D:/ pt/ 2021/ wq1-6-21-/ 1/ fid |
| 2 Title                   | wq1-6-21-                       |
| 3 Comment                 |                                 |
| 4 Origin                  | Bruker BioSpin GmbH             |
| 5 Owner                   | nmsu                            |
| 6 Site                    |                                 |
| 7 Spectrometer            | spect                           |
| 8 Author                  |                                 |
| 9 Solvent                 | CDCl3                           |
| 10 Temperature            | 0.0                             |
| 11 Pulse Sequence         | zg30                            |
| 12 Number of Scans        | 8                               |
| 13 Receiver Gain          | 32                              |
| 14 Relaxation Delay       | 1.0000                          |
| 15 Pulse Width            | 9.9000                          |
| 16 Acquisition Time       | 4.0894                          |
| 17 Acquisition Date       | 2021-07-12T21:36:00             |
| 18 Modification Date      | 2021-07-12T21:36:00             |
| 19 Spectrometer Frequency | 400.13                          |
| 20 Spectral Width         | 8012.8                          |
| 21 Lowest Frequency       | -1847.9                         |
| 22 Nucleus                | 1H                              |
| 23 Acquired Size          | 32768                           |
| 24 Spectral Size          | 65536                           |

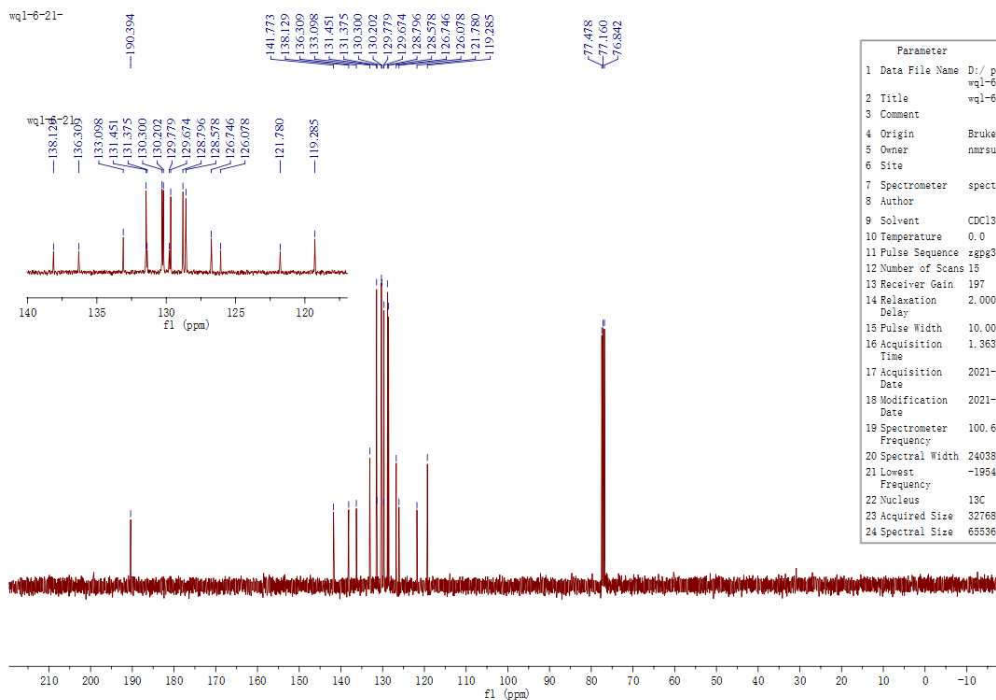

| Parameter                 | Value                           |
|---------------------------|---------------------------------|
| 1 Data File Name          | D:/ pt/ 2021/ wq1-6-21-/ 2/ fid |
| 2 Title                   | wq1-6-21-                       |
| 3 Comment                 |                                 |
| 4 Origin                  | Bruker BioSpin GmbH             |
| 5 Owner                   | nmsu                            |
| 6 Site                    |                                 |
| 7 Spectrometer            | spect                           |
| 8 Author                  |                                 |
| 9 Solvent                 | CDCl3                           |
| 10 Temperature            | 0.0                             |
| 11 Pulse Sequence         | zgpg30                          |
| 12 Number of Scans        | 15                              |
| 13 Receiver Gain          | 197                             |
| 14 Relaxation Delay       | 2.0000                          |
| 15 Pulse Width            | 10.0000                         |
| 16 Acquisition Time       | 1.9631                          |
| 17 Acquisition Date       | 2021-07-12T21:37:00             |
| 18 Modification Date      | 2021-07-12T21:38:00             |
| 19 Spectrometer Frequency | 100.61                          |
| 20 Spectral Width         | 24038.5                         |
| 21 Lowest Frequency       | -1954.0                         |
| 22 Nucleus                | 13C                             |
| 23 Acquired Size          | 32768                           |
| 24 Spectral Size          | 65536                           |
